# Supplementary material for: Transformation of masked benzyl alcohols to o-aminobenzaldehydes through C–H activation: a facile approach to quinazolines
Source: Royal Society of Chemistry journal article supplement (doi:10.1039/c6cc05560e), 2016-01-01

## Transformation of Masked Benzyl Alcohols to *o*-Aminobenzaldehydes through C-H Activation: A Facile Approach to Quinazolines

Xiaolan Chen,<sup>[a]</sup> Jian Han<sup>[a]</sup> Yan Zhu,<sup>[a]</sup> Chuanchen Yuan,<sup>[a]</sup> Jingyu Zhang\*<sup>[b]</sup> and Yingsheng Zhao\*<sup>[a]</sup>

[a] College of Chemistry, Chemical Engineering and Materials Science, Soochow University, Suzhou 215123, P. R. China

[b] College of Physics, Optoelectronics and Energy & Collaborative Innovation Center of Suzhou Nano Science and Technology, Soochow University, Suzhou 215006, P. R. China

### Supporting Information

#### Table of Contents

|                                                                                                                  |     |
|------------------------------------------------------------------------------------------------------------------|-----|
| 1. Reagents .....                                                                                                | S2  |
| 2. Instruments .....                                                                                             | S2  |
| 3. Preparation of various directing groups-protected benzyl alcohol substrates .....                             | S2  |
| 4. Preparation of ( <i>N,N</i> -dimethyl)oxamoyl amide-protected benzyl alcohol substrates .....                 | S3  |
| 4.1. Preparation of ( <i>N,N</i> -dimethyl)oxamoyl chloride <b>S2</b> .....                                      | S3  |
| 4.2 Preparation of Benzylhydroxylamine substrates <b>S1</b> .....                                                | S3  |
| 4.3 Preparation of masked benzyl alcohol substrates <b>1b–1r</b> .....                                           | S3  |
| 4.4 Preparation of masked benzyl alcohol substrates <b>1a</b> .....                                              | S3  |
| 5. Screening of directing groups .....                                                                           | S7  |
| 6. Screening of reaction conditions of intramolecular $\delta$ -C(sp <sup>2</sup> )-H amination .....            | S7  |
| 7. Palladium-Catalyzed Amination to get compound <b>2a-2p</b> .....                                              | S8  |
| 8. Palladium-Catalyzed Intramolecular $\delta$ -C(sp <sup>2</sup> )-H amination .....                            | S13 |
| 9. The removal and transformation of directing group .....                                                       | S16 |
| 9.1 The removal of directing group .....                                                                         | S16 |
| 9.2 Synthesis of quinoline or quinazoline derivatives <b>5-8</b> through transformation of directing group ..... | S16 |
| 10. Synthesis of quinazoline derivatives from aromatic alcohols .....                                            | S17 |
| 11. Preliminary mechanistic study: role of NFSI .....                                                            | S18 |
| 12. Proposed reaction mechanism .....                                                                            | S19 |
| 13. References .....                                                                                             | S19 |
| 14. NMR spectra .....                                                                                            | S20 |

**1. Reagents:** Unless otherwise noted, all reagents were purchased from commercial suppliers and used without further purification. Column chromatography purifications were performed using 300–400 mesh silica gel.

**2. Instruments:** NMR spectra were recorded on Varian Inova–400 MHz, Inova–300 MHz, Bruker DRX–400 or Bruker DRX–500 instruments and calibrated using residual solvent peaks as internal reference. Multiplicities are recorded as: s = singlet, d = doublet, t = triplet, dd = doublet of doublets, br s = broad singlet, m = multiplet. HRMS analysis were carried out using a Bruker micrOTOF–Q instrument or a TOF–MS instrument.

### 3. Preparation of masked benzyl alcohol substrates

#### Preparation of Benzylhydroxylamine substrates S1

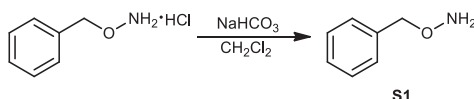

To a beaker of *o*-Benzoylhydroxylamine hydrochloride (4.79 g, 30 mmol, 1.0 eq) was added a solution of saturated sodium bicarbonate at room temperature until the effervescence ended. The organic material was extracted three times with CH<sub>2</sub>Cl<sub>2</sub> (25 ml per extraction). The combined organic layers were washed with brine (50 mL), dried over anhydrous Na<sub>2</sub>SO<sub>4</sub> and concentrated *in vacuo* to give *o*-Benzylhydroxylamine (**S1**).

#### 3.1 Preparation of S1<sup>[1]</sup>

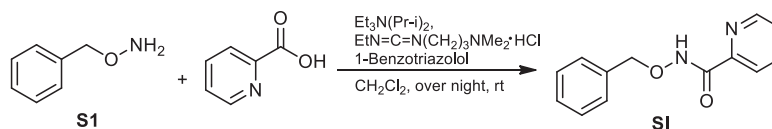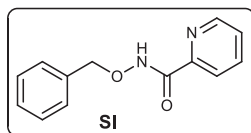

A mixture of **S1** (10 mmol, 1.0 eq), picolinic acid (1.1 eq), EDCI (1.1 eq), HOBT·H<sub>2</sub>O (1.1 eq), and DIPEA (3.0 eq) in anhydrous DCM (40 mL) was stirred at room temperature over night. Water was added and the mixture was extracted with DCM. The combined organic layers was washed with water and brine, dried over anhydrous Na<sub>2</sub>SO<sub>4</sub>, and concentrated *in vacuo*.

The resulting residue was purified by silica gel flash chromatography to give the desired product. Compound **S1** was prepared in 87% yield as white solid. <sup>1</sup>H NMR (400 MHz, CDCl<sub>3</sub>) δ 10.32 (br s, 1H), 8.43 (d, *J* = 4.1 Hz, 1H), 8.16 (d, *J* = 7.8 Hz, 1H), 7.83 (m, 1H), 7.45 – 7.42 (m, 2H), 7.41 – 7.31 (m, 4H), 5.04 (s, 2H); <sup>13</sup>C NMR (101 MHz, CDCl<sub>3</sub>) δ 162.04, 149.11, 148.28, 137.50, 135.33, 129.27, 128.80, 128.66, 126.75, 122.45, 78.63. HRMS Calcd for C<sub>13</sub>H<sub>12</sub>N<sub>2</sub>O<sub>2</sub> [M+H]<sup>+</sup>: 229.0977; Found: 229.0981.

#### 3.2 Preparation of S1<sup>[2]</sup>

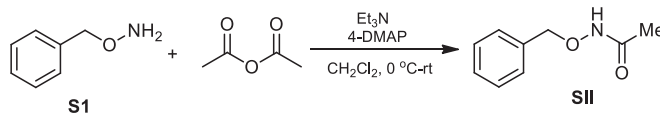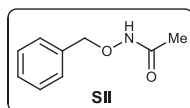

To a solution of **S1** (10 mmol, 1.0 eq) in DCM (40 mL) was added triethylamine (1.5 mL, 11 mmol) and 4-(dimethylamino)pyridine (1 mmol, 0.1 eq) at 0 °C. Acetic anhydride (1.0 mL, 11 mmol) was added dropwise, and the mixture was stirred for 10 min at 0 °C and 30 min at room temperature. The reaction was

washed with saturated aqueous NaHCO<sub>3</sub>, 1 M HCl, water, and brine. The organic layers was dried over anhydrous MgSO<sub>4</sub> and concentrated *in vacuo*, purified by flash column chromatography on silica gel to give the product **S1**, yield 78% as colourless oily liquid. <sup>1</sup>H NMR (400 MHz, CDCl<sub>3</sub>) δ 10.15 (br s, 1H), 7.36 – 7.29 (m, 5H), 4.83 (s, 2H), 1.79 (s, 3H); <sup>13</sup>C NMR (101 MHz, CDCl<sub>3</sub>) δ 168.25, 135.35, 128.94, 128.45, 128.35, 77.86, 19.58. HRMS Calcd for C<sub>9</sub>H<sub>11</sub>NNaO<sub>2</sub> [M+Na]<sup>+</sup>: 188.0687; Found: 188.0693.

#### 3.3 Preparation of S1<sup>[3]</sup>

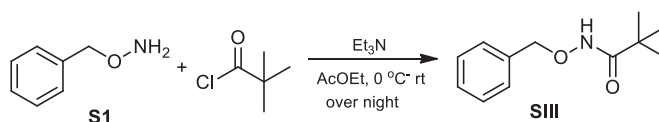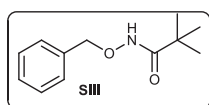

To a stirring solution of **S1** (10 mmol, 1.0 eq), Et<sub>3</sub>N (1.5 mL, 11 mmol) in EtOAc (50 mL), was added trimethylacetyl chloride (1.5 mL, 41 mmol) at 0 °C. The reaction mixture was stirred at 0 °C for 10 minutes. Then, the reaction mixture was stirred at room temperature overnight. After that, the reaction mixture was extracted with EtOAc, washed with brine and dried over anhydrous Na<sub>2</sub>SO<sub>4</sub>. Then, the extract was concentrated *in vacuo* and purified by flash column chromatography on silica gel to give the product **SIII**, yield 76% as white solid. <sup>1</sup>H NMR (400 MHz, CDCl<sub>3</sub>) δ 8.25 (br s, 1H), 7.41 – 7.34 (m, 5H), 4.90 (s, 2H), 1.15 (s, 9H); <sup>13</sup>C NMR (101 MHz, CDCl<sub>3</sub>) δ 176.19, 135.37, 129.54, 128.89, 128.70, 78.01, 38.16, 27.30. HRMS Calcd for C<sub>12</sub>H<sub>17</sub>NO<sub>2</sub> [M+H]<sup>+</sup>: 208.1338; Found: 208.1333.

### 3.4 Preparation of SIV

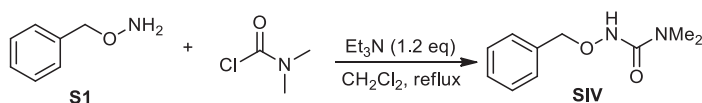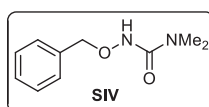

A stirred mixture of **S1** (10.0 mmol), dimethylcarbamoyl chloride (1.62 g, 15 mmol) and Et<sub>3</sub>N (2 mL) in CH<sub>2</sub>Cl<sub>2</sub> (30 mL) was heated under reflux over night. The mixture was poured onto H<sub>2</sub>O (25 mL) and the organic layer was separated, washed with H<sub>2</sub>O (30 mL), brine (30 mL) and dried over anhydrous Na<sub>2</sub>SO<sub>4</sub> and the solvent was removed *in vacuo*, purified by column chromatography on silica gel to give the product **SIV**, Yield 70% as white solid. <sup>1</sup>H NMR (400 MHz, CDCl<sub>3</sub>) δ 7.91 (br s, 1H), 7.38 (dd, *J* = 7.8, 1.6 Hz, 2H), 7.34 – 7.29 (m, 3H), 4.82 (s, 2H), 2.79 (s, 6H); <sup>13</sup>C NMR (101 MHz, CDCl<sub>3</sub>) δ 159.64, 136.14, 128.77, 128.14, 127.99, 77.76, 35.72. HRMS Calcd for C<sub>10</sub>H<sub>14</sub>N<sub>2</sub>O<sub>2</sub> [M+H]<sup>+</sup>: 195.1134; Found: 195.1139. HRMS Calcd for C<sub>10</sub>H<sub>14</sub>N<sub>2</sub>O<sub>2</sub> [M+H]<sup>+</sup>: 195.1134; Found: 195.1151.

## 4. General procedures for the preparation of (*N,N*-dimethyl)oxamoyl amide-protected benzyl alcohol substrates 1a–1r

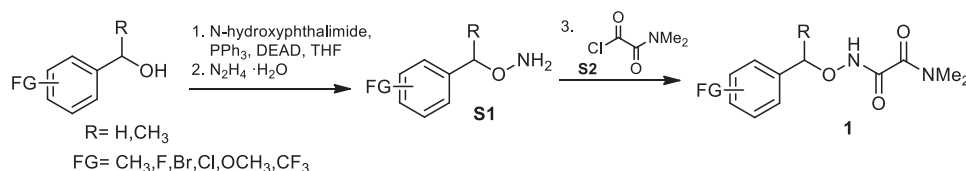

### 4.1 Preparation of (*N,N*-dimethyl)oxamoyl chloride S2<sup>[4]</sup>

**Step A:** A solution of dimethylamine hydrochloride (4.89 g, 60 mmol, 1.0 eq) in CH<sub>2</sub>Cl<sub>2</sub> (50 mL) with triethylamine (10 mL, 72 mmol, 1.2 eq), which need to add CH<sub>2</sub>Cl<sub>2</sub> to make sure that dimethylamine hydrochloride was dissolved completely, was added dropwise to a solution of oxalyl chloride (7.5 mL, 90 mmol, 1.5 eq) in CH<sub>2</sub>Cl<sub>2</sub> (100 mL) at 0 °C. The solution was warmed to room temperature and stirred over night. The excess of oxalyl chloride and the solvent were removed *in vacuo*, CH<sub>2</sub>Cl<sub>2</sub> (60 mL) was added and evaporated. This operation was performed twice to give **S2** as a pale yellow solid. The crude product was used in the next step without further operation.

### 4.2 Preparation of Benzylhydroxylamine substrates S1<sup>[5]</sup>

**Step B:** To a solution of benzyl alcohol (20 mmol, 1.0 eq), *N*-hydroxyphthalimide (22 mmol, 1.1 eq) and PPh<sub>3</sub> (22 mmol, 1.1 eq) in 40 mL anhydrous THF was added diethyl azodicarboxylate (22 mmol, 1.1 eq) dropwise over 5 minutes at room temperature. The reaction was monitored by TLC (silica gel, eluent: EtOAc/ petroleum ether = 1:2) and usually completed in 3 hours. Then hydrazine monohydrate (24 mmol, 1.2 eq) was added dropwise to the reaction mixture. The reaction was monitored by TLC (silica gel, eluent: EtOAc/petroleum ether=1:2) and usually completed in 30 minutes. On completion of the reaction, the mixture was filtered and silica gel (7.0 g) was added to the

filtrate. After removal of the solvent *in vacuo*, the residue was purified by flash column chromatography on silica gel to give the product **S1**.

#### 4. 3 preparation of marked benzyl alcohol substrates 1b–1r

**Step C:** A solution of (*N,N*-dimethyl)oxamoyl chloride **S2** (30 mmol, 1.5 eq) in CH<sub>2</sub>Cl<sub>2</sub> (50 mL) was added dropwise to a solution of the title compound **S1** from **Step B** with triethylamine (3.0 mL, 21 mmol, 1.1 eq) in CH<sub>2</sub>Cl<sub>2</sub> (40 mL) at 0 °C, and then the mixture was stirred at room temperature, over night before quenched by water (50 mL). The organic layer was separated and the aqueous layer was extracted with CH<sub>2</sub>Cl<sub>2</sub> (20 mL × 2). The combined organic layers were washed with brine (30 mL) and dried over anhydrous Na<sub>2</sub>SO<sub>4</sub>. After removal of the solvent *in vacuo*, purified by column chromatography on silica gel to give the product as white solid or colorless vitreous fluid.

#### 4. 4 preparation of masked benzyl alcohol substrates 1a

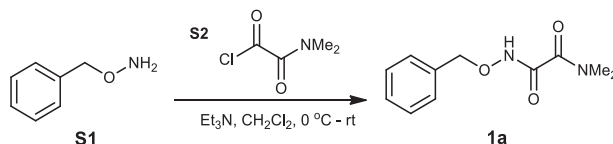

To a beaker of *o*-Benzoylhydroxylamine hydrochloride (4.79 g, 30 mmol, 1.0 eq) was added a solution of saturated sodium bicarbonate at room temperature until the effervescence ended. The organic material was extracted three times with CH<sub>2</sub>Cl<sub>2</sub> (25 mL per extraction). The combined organic layers were washed with brine (50 mL), dried over anhydrous Na<sub>2</sub>SO<sub>4</sub> and concentrated *in vacuo* to give *o*-Benzoylhydroxylamine (**S1**). Then according to the **step C** to get the compound **1a** as white solid, Yield 5.3 g, 80 %.

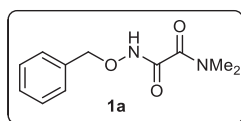

Compound **1a**: white solid. Yield 80%. <sup>1</sup>H NMR (400 MHz, CDCl<sub>3</sub>) δ 10.46 (br s, 1H), 7.42 (dd, *J* = 7.2, 1.9 Hz, 2H), 7.35 – 7.32 (m, 3H), 4.93 (s, 2H), 3.18 (s, 3H), 2.89 (s, 3H); <sup>13</sup>C NMR (101 MHz, CDCl<sub>3</sub>) δ 161.26, 159.10, 134.86, 129.38, 128.98, 128.69, 78.50, 38.08, 36.46. HRMS Calcd for C<sub>11</sub>H<sub>14</sub>N<sub>2</sub>O<sub>3</sub> [M+H]<sup>+</sup>: 223.1083; Found: 223.1092.

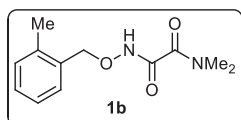

Compound **1b**: white solid. Yield 50%. <sup>1</sup>H NMR (400 MHz, CDCl<sub>3</sub>) δ 9.68 (br s, 1H), 7.38 – 7.30 (m, 2H), 6.97 – 6.88 (m, 2H), 5.02 (s, 2H), 3.85 (s, 3H), 3.31 (s, 3H), 2.96 (s, 3H); <sup>13</sup>C NMR (101 MHz, CDCl<sub>3</sub>) δ 161.19, 158.80, 158.22, 131.49, 130.61, 123.24, 120.62, 110.76, 73.78, 55.64, 38.13, 36.57. HRMS Calcd for C<sub>12</sub>H<sub>16</sub>N<sub>2</sub>O<sub>3</sub> [M+H]<sup>+</sup>: 237.1239, Found: 237.1249.

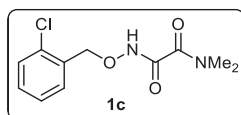

Compound **1c**: white solid. Yield 63%. <sup>1</sup>H NMR (400 MHz, CDCl<sub>3</sub>) δ 9.69 (br s, 1H), 7.54 – 7.49 (m, 1H), 7.42 – 7.38 (m, 1H), 7.32 – 7.28 (m, 2H), 5.11 (s, 2H), 3.34 (s, 3H), 2.98 (s, 3H); <sup>13</sup>C NMR (101 MHz, CDCl<sub>3</sub>) δ 160.88, 159.14, 134.59, 132.76, 131.30, 130.43, 129.81, 127.13, 75.46, 38.18, 36.73. HRMS Calcd for C<sub>11</sub>H<sub>13</sub>ClN<sub>2</sub>O<sub>3</sub> [M+H]<sup>+</sup>: 257.0693; Found: 257.0701.

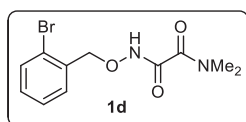

Compound **1d**: white solid. Yield 52%.  $^1\text{H}$  NMR (400 MHz,  $\text{CDCl}_3$ )  $\delta$  9.70 (br s, 1H), 7.46 (t,  $J = 6.9$  Hz, 1H), 7.35 (dd,  $J = 13.1, 6.3$  Hz, 1H), 7.15 (t,  $J = 7.4$  Hz, 1H), 7.07 (t,  $J = 9.0$  Hz, 1H), 5.03 (s, 2H), 3.32 (s, 3H), 2.97 (s, 3H);  $^{13}\text{C}$  NMR (101 MHz,  $\text{CDCl}_3$ )  $\delta$  161.02, 159.15, 134.51, 133.03, 131.23, 130.42, 127.73, 124.36, 77.54, 38.16, 36.64. HRMS Calcd for  $\text{C}_{11}\text{H}_{13}\text{BrN}_2\text{O}_3$   $[\text{M}+\text{H}]^+$ : 301.0188; Found: 301.0196.

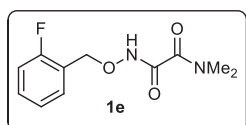

Compound **1e**: white solid. Yield 55%.  $^1\text{H}$  NMR (400 MHz,  $\text{CDCl}_3$ )  $\delta$  10.21 (br s, 1H), 7.45 (t,  $J = 7.1$  Hz, 1H), 7.35 – 7.28 (m, 1H), 7.11 (t,  $J = 7.5$  Hz, 1H), 7.03 (t,  $J = 9.1$  Hz, 1H), 5.00 (s, 2H), 3.24 (s, 3H), 2.91 (s, 3H);  $^{13}\text{C}$  NMR (101 MHz,  $\text{CDCl}_3$ )  $\delta$  161.47 (d,  $J_{\text{C-F}} = 247.0$  Hz), 161.35, 159.21, 131.83 (d,  $J_{\text{C-F}} = 4.0$  Hz), 130.90 (d,  $J_{\text{C-F}} = 8.0$  Hz), 124.26 (d,  $J_{\text{C-F}} = 3.0$  Hz), 122.17 (d,  $J_{\text{C-F}} = 14.0$  Hz), 115.51 (d,  $J_{\text{C-F}} = 21.0$  Hz), 71.61, 37.98, 36.27.  $^{19}\text{F}$  NMR (376 MHz,  $\text{CDCl}_3$ )  $\delta$  -117.88; HRMS Calcd for  $\text{C}_{11}\text{H}_{13}\text{FN}_2\text{O}_3$   $[\text{M}+\text{H}]^+$ : 241.0988; Found: 241.0998.

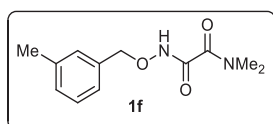

Compound **1f**: colorless vitreous fluid. Yield 64%.  $^1\text{H}$  NMR (400 MHz,  $\text{CDCl}_3$ )  $\delta$  10.02 (br s, 1H), 7.27 – 7.22 (m, 2H), 7.21 (d,  $J = 7.1$  Hz, 1H), 7.15 (d,  $J = 7.2$  Hz, 1H), 4.90 (s, 2H), 3.27 (s, 3H), 2.94 (s, 3H), 2.35 (s, 3H);  $^{13}\text{C}$  NMR (101 MHz,  $\text{CDCl}_3$ )  $\delta$  161.39, 159.10, 138.33, 134.73, 129.99, 129.65, 128.52, 126.35, 78.50, 38.01, 36.33, 21.36. HRMS Calcd for  $\text{C}_{12}\text{H}_{16}\text{N}_2\text{O}_3$   $[\text{M}+\text{H}]^+$ : 237.1239; Found: 237.1244.

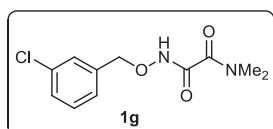

Compound **1g**: white solid. Yield 50%.  $^1\text{H}$  NMR (400 MHz,  $\text{CDCl}_3$ )  $\delta$  10.12 (br s, 1H), 7.41 (s, 1H), 7.32 – 7.28 (m, 3H), 4.90 (s, 2H), 3.28 (s, 3H), 2.94 (s, 3H);  $^{13}\text{C}$  NMR (101 MHz,  $\text{CDCl}_3$ )  $\delta$  161.22, 159.19, 136.99, 134.50, 129.99, 129.19, 129.03, 127.28, 77.54, 38.09, 36.48. HRMS Calcd for  $\text{C}_{11}\text{H}_{13}\text{ClN}_2\text{O}_3$   $[\text{M}+\text{H}]^+$ : 257.0693; Found: 257.0701.

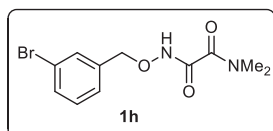

Compound **1h**: white solid. Yield 47%.  $^1\text{H}$  NMR (400 MHz,  $\text{CDCl}_3$ )  $\delta$  10.18 (br s, 1H), 7.62 (s, 1H), 7.51 (d,  $J = 7.9$  Hz, 1H), 7.39 (d,  $J = 7.5$  Hz, 1H), 7.32 – 7.27 (m, 1H), 4.94 (s, 2H), 3.33 (s, 3H), 3.00 (s, 3H);  $^{13}\text{C}$  NMR (101 MHz,  $\text{CDCl}_3$ )  $\delta$  161.40, 159.18, 137.25, 131.99, 131.82, 130.17, 127.70, 122.50, 77.35, 38.00, 36.29. HRMS Calcd for  $\text{C}_{11}\text{H}_{13}\text{BrN}_2\text{O}_3$   $[\text{M}+\text{H}]^+$ : 301.0188; Found: 301.0190.

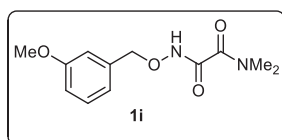

Compound **1i**: colorless oily liquid. Yield 61%.  $^1\text{H}$  NMR (400 MHz,  $\text{CDCl}_3$ )  $\delta$  10.25 (br s, 1H), 7.22 (t,  $J = 8.0$  Hz, 1H), 6.97 – 6.91 (m, 2H), 6.84 (dd,  $J = 8.2, 2.1$  Hz, 1H), 4.88 (s, 2H), 3.76 (s, 3H), 3.20 (s, 3H), 2.89 (s, 3H);  $^{13}\text{C}$  NMR (101 MHz,  $\text{CDCl}_3$ )  $\delta$  161.48, 159.71, 159.16, 136.38, 129.57, 121.35, 114.62, 114.23, 78.19, 55.25, 37.91, 36.13. HRMS Calcd for  $\text{C}_{12}\text{H}_{16}\text{N}_2\text{O}_4$   $[\text{M}+\text{H}]^+$ : 253.1188; Found: 253.1191.

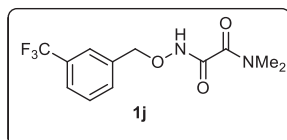

Compound **1j**: white solid. Yield 45%.  $^1\text{H}$  NMR (400 MHz,  $\text{CDCl}_3$ )  $\delta$  10.21 (br s, 1H), 7.67 (s, 1H), 7.63 – 7.58 (m, 2H), 7.48 (t,  $J = 7.7$  Hz, 1H), 4.98 (s, 2H), 3.26 (s, 3H), 2.94 (s, 3H);  $^{13}\text{C}$  NMR (101 MHz,  $\text{CDCl}_3$ )  $\delta$  161.28, 159.34, 136.03, 132.51, 131.01 (q,  $J_{\text{C-F}} = 33.0$  Hz), 129.22, 125.86 (d,  $J_{\text{C-F}} = 3.0$  Hz), 125.70 (d,  $J_{\text{C-F}} = 3.0$  Hz), 124.04 (q,  $J_{\text{C-F}} = 270.0$  Hz), 77.55, 38.05, 36.43.  $^{19}\text{F}$  NMR (376 MHz,  $\text{CDCl}_3$ )  $\delta$  -62.66. HRMS Calcd for  $\text{C}_{12}\text{H}_{13}\text{F}_3\text{N}_2\text{O}_3$   $[\text{M}+\text{H}]^+$ : 291.0957; Found: 291.0964.

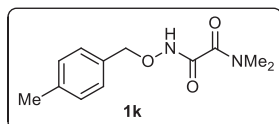

Compound **1k**: white solid. Yield 43%.  $^1\text{H}$  NMR (400 MHz,  $\text{CDCl}_3$ )  $\delta$  9.55 (br s, 1H), 7.31 (d,  $J = 7.8$  Hz, 2H), 7.18 (d,  $J = 7.8$  Hz, 2H), 4.90 (s, 2H), 3.32 (s, 3H), 2.97 (s, 3H), 2.36 (s, 3H);  $^{13}\text{C}$  NMR (101 MHz,  $\text{CDCl}_3$ )  $\delta$  161.05, 158.98, 139.00, 131.75, 129.51, 129.45, 78.44, 38.15, 36.64, 21.39. HRMS Calcd for  $\text{C}_{12}\text{H}_{16}\text{N}_2\text{O}_3$   $[\text{M}+\text{H}]^+$ : 237.1239; Found: 237.1246.

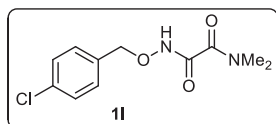

Compound **1l**: white solid. Yield 66%.  $^1\text{H}$  NMR (400 MHz,  $\text{CDCl}_3$ )  $\delta$  9.86 (br s, 1H), 7.38 – 7.33 (m, 4H), 4.91 (s, 2H), 3.31 (s, 3H), 2.96 (s, 3H);  $^{13}\text{C}$  NMR (101 MHz,  $\text{CDCl}_3$ )  $\delta$  161.17, 159.15, 134.94, 133.41, 130.72, 128.89, 77.62, 38.11, 36.52. HRMS Calcd for  $\text{C}_{11}\text{H}_{13}\text{ClN}_2\text{O}_3$   $[\text{M}+\text{H}]^+$ : 257.0693; Found: 257.0700.

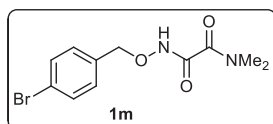

Compound **1m**: white solid. Yield 73%.  $^1\text{H}$  NMR (400 MHz,  $\text{CDCl}_3$ )  $\delta$  10.03 (br s, 1H), 7.48 (d,  $J = 8.4$  Hz, 2H), 7.29 (d,  $J = 8.2$  Hz, 2H), 4.87 (s, 2H), 3.27 (s, 3H), 2.94 (s, 3H);  $^{13}\text{C}$  NMR (101 MHz,  $\text{CDCl}_3$ )  $\delta$  161.29, 159.17, 133.93, 131.79, 130.96, 123.07, 77.59, 38.07, 36.40. HRMS Calcd for  $\text{C}_{11}\text{H}_{13}\text{BrN}_2\text{O}_3$   $[\text{M}+\text{H}]^+$ : 301.0188; Found: 301.0196.

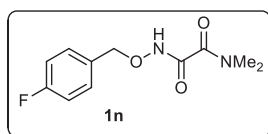

Compound **1n**: white solid. Yield 57%.  $^1\text{H}$  NMR (400 MHz,  $\text{CDCl}_3$ )  $\delta$  9.99 (br s, 1H), 7.40 (dd,  $J$  = 8.0, 5.7 Hz, 2H), 7.04 (dd,  $J$  = 12.0, 5.3 Hz, 2H), 4.89 (s, 2H), 3.27 (s, 3H), 2.94 (s, 3H);  $^{13}\text{C}$  NMR (101 MHz,  $\text{CDCl}_3$ )  $\delta$  162.94 (d,  $J_{\text{C-F}}$  = 246.0 Hz), 161.61, 159.20, 131.24 (d,  $J_{\text{C-F}}$  = 8.0 Hz), 130.79 (d,  $J_{\text{C-F}}$  = 3.0 Hz), 115.37 (d,  $J_{\text{C-F}}$  = 22.0 Hz), 77.43, 37.85, 36.01;  $^{19}\text{F}$  NMR (376 MHz,  $\text{CDCl}_3$ )  $\delta$  -112.85. HRMS Calcd for  $\text{C}_{11}\text{H}_{13}\text{FN}_2\text{O}_3$   $[\text{M}+\text{H}]^+$ : 241.0988; Found: 241.0996.

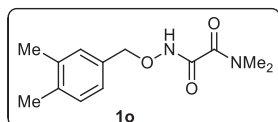

Compound **1o**: white solid. Yield 62%.  $^1\text{H}$  NMR (400 MHz,  $\text{CDCl}_3$ )  $\delta$  9.67 (br s, 1H), 7.18 (s, 1H), 7.12 (s, 2H), 4.87 (s, 2H), 3.31 (s, 3H), 2.96 (s, 3H), 2.25 (d,  $J$  = 1.2 Hz, 6H);  $^{13}\text{C}$  NMR (101 MHz,  $\text{CDCl}_3$ )  $\delta$  161.18, 158.98, 137.57, 137.00, 132.15, 130.71, 129.94, 126.94, 78.48, 38.10, 36.53, 19.78, 19.67. HRMS Calcd for  $\text{C}_{13}\text{H}_{18}\text{N}_2\text{O}_3$   $[\text{M}+\text{H}]^+$ : 251.1396; Found: 251.1395.

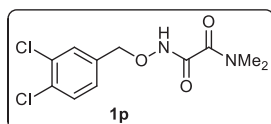

Compound **1p**: white solid. Yield 68%.  $^1\text{H}$  NMR (400 MHz,  $\text{CDCl}_3$ )  $\delta$  10.03 (br s, 1H), 7.46 (s, 1H), 7.37 (d,  $J$  = 8.2 Hz, 1H), 7.20 (d,  $J$  = 3.4 Hz, 1H), 4.82 (s, 2H), 3.24 (s, 3H), 2.90 (s, 3H);  $^{13}\text{C}$  NMR (101 MHz,  $\text{CDCl}_3$ )  $\delta$  161.15, 159.25, 135.23, 133.04, 132.75, 131.02, 130.69, 128.41, 38.11, 36.51. HRMS Calcd for  $\text{C}_{11}\text{H}_{12}\text{Cl}_2\text{N}_2\text{O}_3$   $[\text{M}+\text{H}]^+$ : 291.0303; Found: 291.0315.

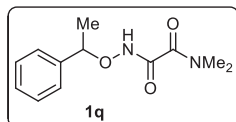

Compound **1q**: white solid. Yield 70%.  $^1\text{H}$  NMR (400 MHz,  $\text{CDCl}_3$ )  $\delta$  9.54 (br s, 1H), 7.38-7.30 (m, 5H), 5.00 (q,  $J$  = 6.5 Hz, 1H), 3.20 (s, 3H), 2.89 (s, 3H), 1.58 (d,  $J$  = 6.6 Hz, 3H);  $^{13}\text{C}$  NMR (101 MHz,  $\text{CDCl}_3$ )  $\delta$  161.32, 158.97, 140.41, 128.70, 128.64, 126.96, 83.95, 37.96, 36.30, 20.94. HRMS Calcd for  $\text{C}_{12}\text{H}_{16}\text{N}_2\text{O}_3$   $[\text{M}+\text{H}]^+$ : 237.1239; Found: 237.1248.

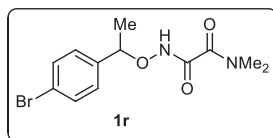

Compound **1r**: colorless vitreous fluid. Yield 73%.  $^1\text{H}$  NMR (400 MHz,  $\text{CDCl}_3$ )  $\delta$  10.11 (br s, 1H), 7.47 (d,  $J$  = 8.4 Hz, 2H), 7.28 (d,  $J$  = 8.3 Hz, 2H), 4.98 (q,  $J$  = 6.5 Hz, 1H), 3.17 (s, 3H), 2.87 (s, 3H), 1.55 (d,  $J$  = 6.6 Hz, 3H);  $^{13}\text{C}$  NMR (101 MHz,  $\text{CDCl}_3$ )  $\delta$  161.31, 159.03, 139.59, 131.78, 128.73, 122.53, 83.19, 37.99, 36.31, 20.87. HRMS Calcd for  $\text{C}_{12}\text{H}_{15}\text{BrN}_2\text{O}_3$   $[\text{M}+\text{H}]^+$ : 315.0344; Found: 315.0357.

## 5. Screening of directing groups.



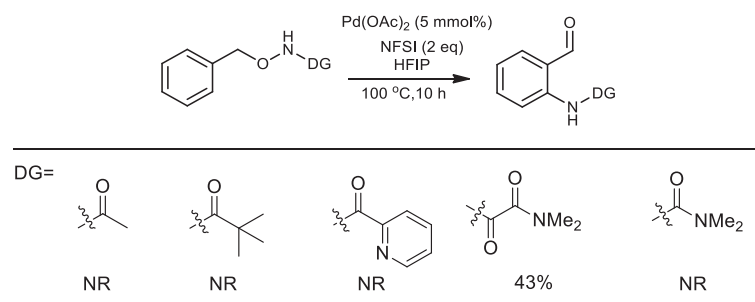

[a] Reactions were carried out on a 0.2 mmol scale, using NFSI (2 eq) as an oxidant, using HFIP (1.5 mL) as the solvent. Yields were based on GC. NFSI = N-Fluorobenzenesulphonimide.

## 6. Screening of reaction conditions of intramolecular $\delta$ -C(sp<sup>2</sup>)-H amination.<sup>[a]</sup>

| entry             | oxidant                                                | oxidant                                 | additive  | yield (%) <sup>[f,g]</sup><br>2a : 3a |    |
|-------------------|--------------------------------------------------------|-----------------------------------------|-----------|---------------------------------------|----|
| 1                 | PhI(OAc) <sub>2</sub> (2 equiv)                        |                                         |           | 0                                     | 12 |
| 2                 | K <sub>2</sub> S <sub>2</sub> O <sub>8</sub> (2 equiv) |                                         |           | 16                                    | 30 |
| 3                 | NFSI (2 equiv)                                         |                                         |           | 43                                    | 56 |
| 4 <sup>[b]</sup>  | NFSI (2 equiv)                                         |                                         |           | 76                                    | 11 |
| 5 <sup>[b]</sup>  | NFSI (2.5 equiv)                                       |                                         |           | 80                                    | 10 |
| 6 <sup>[b]</sup>  | NFSI (2.5 equiv)                                       |                                         | NaOAc     | 91(82)                                | 3  |
| 7                 | H <sub>2</sub> O <sub>2</sub> (4 equiv)                |                                         |           | 32                                    | 60 |
| 8                 | K <sub>2</sub> S <sub>2</sub> O <sub>8</sub> (2 equiv) | TBPB (4 equiv)                          |           | 18                                    | 37 |
| 9                 | K <sub>2</sub> S <sub>2</sub> O <sub>8</sub> (2 equiv) | DTBP (4 equiv)                          |           | 38                                    | 50 |
| 10                | K <sub>2</sub> S <sub>2</sub> O <sub>8</sub> (2 equiv) | H <sub>2</sub> O <sub>2</sub> (4 equiv) |           | 25                                    | 68 |
| 11 <sup>[c]</sup> | K <sub>2</sub> S <sub>2</sub> O <sub>8</sub> (2 equiv) | H <sub>2</sub> O <sub>2</sub> (4 equiv) |           | 0                                     | 0  |
| 12 <sup>[d]</sup> | K <sub>2</sub> S <sub>2</sub> O <sub>8</sub> (2 equiv) | H <sub>2</sub> O <sub>2</sub> (4 equiv) |           | 22                                    | 32 |
| 13 <sup>[e]</sup> | K <sub>2</sub> S <sub>2</sub> O <sub>8</sub> (2 equiv) | H <sub>2</sub> O <sub>2</sub> (4 equiv) |           | 10                                    | 17 |
| 14                | K <sub>2</sub> S <sub>2</sub> O <sub>8</sub> (2 equiv) | H <sub>2</sub> O <sub>2</sub> (4 equiv) | PivOH     | 14                                    | 80 |
| 15                | K <sub>2</sub> S <sub>2</sub> O <sub>8</sub> (2 equiv) | H <sub>2</sub> O <sub>2</sub> (4 equiv) | Ac-Val-OH | 22                                    | 74 |
| 16                | K <sub>2</sub> S <sub>2</sub> O <sub>8</sub> (2 equiv) | H <sub>2</sub> O <sub>2</sub> (4 equiv) | PhCOOH    | 75                                    | 73 |
| 17                | K <sub>2</sub> S <sub>2</sub> O <sub>8</sub> (2 equiv) | H <sub>2</sub> O <sub>2</sub> (4 equiv) | DCB       | 7                                     | 89 |

**Reaction conditions:** [a] **1a** (0.1 mmol, 1.0 equiv), Pd(OAc)<sub>2</sub> (0.005 mmol), oxidant (0.2 mmol, 2.0 equiv), HFIP (1.5 mL), 100 °C, 10 h; [b] 24 h; [c] Without Pd(OAc)<sub>2</sub>; [d] Using 1,4-dioxane as solvent; [e] Using DCE as solvent. [f] Yield was based on GC using tridecane as the internal standard. [g] Isolated yield. NFSI = N-Fluorobenzenesulphonimide. HFIP = hexafluoroisopropanol. TBPB = tert-butyl peroxybenzoate. DTBP = di-*t*-butylperoxide. H<sub>2</sub>O<sub>2</sub> (35 wt.% solution in water). DCB = 3,5-dichlorobenzoic acid.

## 7. Palladium-Catalyzed Amination Using NFSI As An Oxidant.

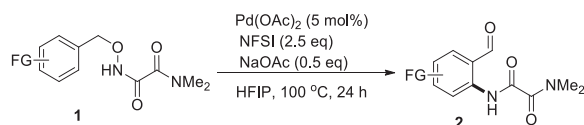

A mixture of **1** (0.2 mmol, 1.0 eq), Pd(OAc)<sub>2</sub> (2.2 mg, 0.05 eq), NFSI (157.6 mg, 0.5 mmol, 2.5 eq), NaOAc (8.2 mg, 0.1 mmol, 0.5 eq) and HFIP (3 mL) in a 25 mL glass vial sealed with PTFE cap was heated at 100 °C for 24 hours. The reaction mixture was cooled to room temperature, The crude



reaction mixture was diluted with EtOAc (6 mL) and filtered on a pad of Celite. Then a spoon of silica gel (0.2 g) was added and the filtrate was concentrated *in vacuo*. The resulting residue was purified by column chromatography to give the product **2a-2p**.

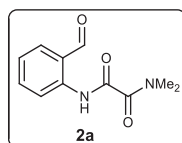

Compound **2a**: white solid.  $^1\text{H}$  NMR (400 MHz,  $\text{CDCl}_3$ )  $\delta$  12.32 (br s, 1H), 9.89 (s, 1H), 8.62 (d,  $J$  = 8.4 Hz, 1H), 7.66 (dd,  $J$  = 7.6, 1.6 Hz, 1H), 7.56 – 7.51 (m, 1H), 7.21 (m,  $J$  = 7.5, 1.0 Hz, 1H), 3.36 (s, 3H), 3.02 (s, 3H).  $^{13}\text{C}$  NMR (101 MHz,  $\text{CDCl}_3$ )  $\delta$  194.64, 161.43, 160.13, 139.00, 136.03, 135.60, 123.85, 122.62, 119.62, 38.31, 37.21. HRMS Calcd for  $\text{C}_{11}\text{H}_{12}\text{N}_2\text{O}_3$   $[\text{M}+\text{H}]^+$ : 221.0926; Found: 221.0936.

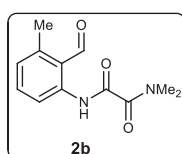

Compound **2b**: white solid.  $^1\text{H}$  NMR (400 MHz,  $\text{CDCl}_3$ )  $\delta$  12.77 (br s, 1H), 10.51 (s, 1H), 8.56 (d,  $J$  = 8.5 Hz, 1H), 7.48 (t,  $J$  = 8.0 Hz, 1H), 7.00 (d,  $J$  = 7.5 Hz, 1H), 3.41 (s, 3H), 3.10 (s, 3H), 2.68 (s, 3H);  $^{13}\text{C}$  NMR (101 MHz,  $\text{CDCl}_3$ )  $\delta$  193.81, 162.00, 160.52, 143.43, 140.04, 135.99, 127.02, 120.47, 118.53, 38.53, 37.41, 19.32. HRMS Calcd for  $\text{C}_{12}\text{H}_{14}\text{N}_2\text{O}_3$   $[\text{M}+\text{H}]^+$ : 235.1083; Found: 235.1084.

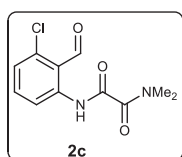

Compound **2c**: white solid.  $^1\text{H}$  NMR (400 MHz,  $\text{CDCl}_3$ )  $\delta$  12.81 (br s, 1H), 10.63 (s, 1H), 8.67 (d,  $J$  = 8.5 Hz, 1H), 7.53 (t,  $J$  = 8.3 Hz, 1H), 7.23 (dd,  $J$  = 8.0, 0.9 Hz, 1H), 3.43 (s, 3H), 3.12 (s, 3H);  $^{13}\text{C}$  NMR (101 MHz,  $\text{CDCl}_3$ )  $\delta$  193.57, 161.50, 160.44, 141.45, 140.42, 136.43, 125.81, 119.04, 118.80, 38.58, 37.62. HRMS Calcd for  $\text{C}_{11}\text{H}_9\text{ClN}_2\text{O}_3$   $[\text{M}+\text{H}]^+$ : 255.0536; Found: 255.0544.

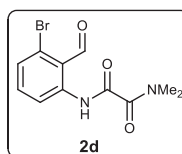

Compound **2d**: white solid.  $^1\text{H}$  NMR (400 MHz,  $\text{CDCl}_3$ )  $\delta$  12.81 (br s, 1H), 10.53 (s, 1H), 8.75 – 8.69 (m, 1H), 7.46 – 7.42 (m, 2H), 3.43 (s, 3H), 3.12 (s, 3H);  $^{13}\text{C}$  NMR (101 MHz,  $\text{CDCl}_3$ )  $\delta$  196.07, 161.48, 160.31, 141.50, 136.49, 130.03, 129.33, 119.79, 119.49, 38.58, 37.63. HRMS Calcd for  $\text{C}_{11}\text{H}_9\text{BrN}_2\text{O}_3$   $[\text{M}+\text{H}]^+$ : 299.0031; Found: 299.0045.

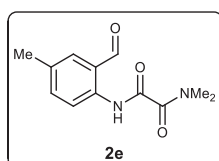

Compound **2e**: white solid.  $^1\text{H}$  NMR (400 MHz,  $\text{CDCl}_3$ )  $\delta$  12.28 (br s, 1H), 9.91 (s, 1H), 8.57 (d,  $J$  = 8.5 Hz, 1H), 7.49 (d,  $J$  = 1.8 Hz, 1H), 7.41 (dd,  $J$  = 8.5, 2.0 Hz, 1H), 3.41 (s, 3H), 3.08 (s, 3H), 2.39 (s, 3H);  $^{13}\text{C}$  NMR (101 MHz,  $\text{CDCl}_3$ )  $\delta$  194.83, 161.79, 160.18, 136.86, 136.48, 136.41, 133.84, 122.84, 119.94, 38.51, 37.43, 20.65. HRMS Calcd for  $\text{C}_{12}\text{H}_{14}\text{N}_2\text{O}_3$   $[\text{M}+\text{H}]^+$ : 235.1083; Found: 235.1093.

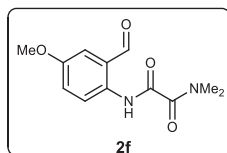

Compound **2f**: white solid.  $^1\text{H}$  NMR (400 MHz,  $\text{CDCl}_3$ )  $\delta$  12.16 (br s, 1H), 9.94 (s, 1H), 8.66 (d,  $J$  = 9.0 Hz, 1H), 7.22 (d,  $J$  = 3.0 Hz, 1H), 7.18 (dd,  $J$  = 9.0, 3.0 Hz, 1H), 3.88 (s, 3H), 3.44 (s, 3H), 3.11 (s, 3H);  $^{13}\text{C}$  NMR (101 MHz,  $\text{CDCl}_3$ )  $\delta$  194.35, 161.88, 159.93, 155.99, 132.78, 123.91, 121.73, 121.54, 120.02, 55.87, 38.58, 37.52. HRMS Calcd for  $\text{C}_{12}\text{H}_{14}\text{N}_2\text{O}_4$   $[\text{M}+\text{H}]^+$ : 251.1032; Found: 251.1039.

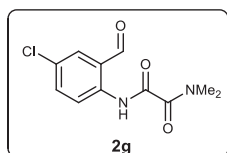

Compound **2g**: white solid.  $^1\text{H}$  NMR (400 MHz,  $\text{CDCl}_3$ )  $\delta$  12.38 (br s, 1H), 9.93 (s, 1H), 8.71 (d,  $J$  = 9.0 Hz, 1H), 7.70 (d,  $J$  = 2.5 Hz, 1H), 7.59 (dd,  $J$  = 9.0, 2.5 Hz, 1H), 3.45 (s, 3H), 3.12 (s, 3H);  $^{13}\text{C}$  NMR (101 MHz,  $\text{CDCl}_3$ )  $\delta$  193.46, 161.29, 160.20, 137.80, 135.67, 135.31, 129.25, 123.96, 121.54, 38.60, 37.70. HRMS Calcd for  $\text{C}_{11}\text{H}_{11}\text{ClN}_2\text{O}_3$   $[\text{M}+\text{H}]^+$ : 255.0536; Found: 255.0537.

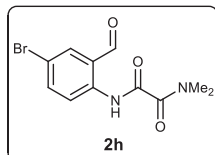

Compound **2h**: white solid.  $^1\text{H}$  NMR (400 MHz,  $\text{CDCl}_3$ )  $\delta$  12.39 (br s, 1H), 9.92 (s, 1H), 8.65 (d,  $J$  = 8.9 Hz, 1H), 7.84 (d,  $J$  = 2.4 Hz, 1H), 7.73 (dd,  $J$  = 8.9, 2.3 Hz, 1H), 3.45 (s, 3H), 3.11 (s, 3H);  $^{13}\text{C}$  NMR (101 MHz,  $\text{CDCl}_3$ )  $\delta$  193.41, 161.28, 160.21, 138.57, 138.33, 138.25, 124.28, 121.76, 116.43, 38.61, 37.71. HRMS Calcd for  $\text{C}_{11}\text{H}_{11}\text{BrN}_2\text{O}_3$   $[\text{M}+\text{H}]^+$ : 299.0031; Found: 299.0034.

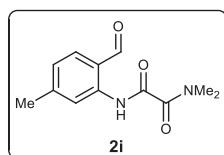

Compound **2i**: white solid.  $^1\text{H}$  NMR (400 MHz,  $\text{CDCl}_3$ )  $\delta$  12.42 (br s, 1H), 9.92 (s, 1H), 8.56 (s, 1H), 7.60 (d,  $J$  = 7.8 Hz, 1H), 7.11 (d,  $J$  = 7.1 Hz, 1H), 3.43 (s, 3H), 3.11 (s, 3H), 2.46 (s, 3H);  $^{13}\text{C}$  NMR (101 MHz,  $\text{CDCl}_3$ )  $\delta$  194.22, 161.81, 160.46, 147.62, 139.33, 136.29, 125.01, 120.93, 120.45, 38.57, 37.51, 22.55. HRMS Calcd for  $\text{C}_{12}\text{H}_{14}\text{N}_2\text{O}_3$   $[\text{M}+\text{H}]^+$ : 235.1083; Found: 235.1093.

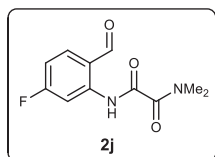

Compound **2j**: white solid.  $^1\text{H}$  NMR (400 MHz,  $\text{CDCl}_3$ )  $\delta$  12.62 (br s, 1H), 9.93 (s, 1H), 8.51 (dd,  $J = 11.6, 2.1$  Hz, 1H), 7.73 (dd,  $J = 8.5, 6.2$  Hz, 1H), 6.98 (m, 1H), 3.45 (s, 3H), 3.12 (s, 3H);  $^{13}\text{C}$  NMR (101 MHz,  $\text{CDCl}_3$ )  $\delta$  193.27, 167.05 (d,  $J_{\text{C-F}} = 256.0$  Hz), 161.20, 160.48, 141.65 (d,  $J_{\text{C-F}} = 14.0$  Hz), 138.57 (d,  $J_{\text{C-F}} = 12.0$  Hz), 119.75 (d,  $J_{\text{C-F}} = 2.0$  Hz), 111.36 (d,  $J_{\text{C-F}} = 23.0$  Hz), 107.63 (d,  $J_{\text{C-F}} = 29.0$  Hz), 38.58, 37.66;  $^{19}\text{F}$  NMR (376 MHz,  $\text{CDCl}_3$ )  $\delta$  -98.05. HRMS Calcd for  $\text{C}_{11}\text{H}_{11}\text{FN}_2\text{O}_3$   $[\text{M}+\text{H}]^+$ : 239.0832; Found: 239.0840.

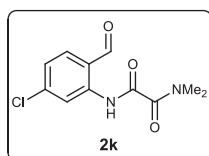

Compound **2k**: white solid.  $^1\text{H}$  NMR (400 MHz,  $\text{CDCl}_3$ )  $\delta$  12.51 (br s, 1H), 9.93 (s, 1H), 8.98 (d,  $J = 1.4$  Hz, 1H), 7.57 (d,  $J = 8.2$  Hz, 1H), 7.45 (dd,  $J = 8.2, 1.8$  Hz, 1H), 3.45 (s, 3H), 3.12 (s, 3H);  $^{13}\text{C}$  NMR (101 MHz,  $\text{CDCl}_3$ )  $\delta$  193.81, 161.17, 160.28, 140.03, 137.04, 131.43, 127.35, 123.07, 121.57, 38.63, 37.74. HRMS Calcd for  $\text{C}_{11}\text{H}_{11}\text{ClN}_2\text{O}_3$   $[\text{M}+\text{H}]^+$ : 255.0536; Found: 255.0550.

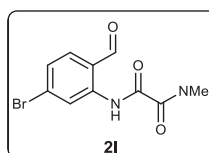

Compound **2l**: white solid.  $^1\text{H}$  NMR (400 MHz,  $\text{CDCl}_3$ )  $\delta$  12.53 (br s, 1H), 9.94 (s, 1H), 8.81 (d,  $J = 1.8$  Hz, 1H), 7.66 (d,  $J = 8.2$  Hz, 1H), 7.28 (dd,  $J = 8.5, 1.4$  Hz, 1H), 3.45 (s, 3H), 3.12 (s, 3H);  $^{13}\text{C}$  NMR (101 MHz,  $\text{CDCl}_3$ )  $\delta$  193.59, 161.18, 160.33, 142.59, 140.18, 137.05, 124.34, 121.25, 120.14, 38.62, 37.72. HRMS Calcd for  $\text{C}_{11}\text{H}_{11}\text{BrN}_2\text{O}_3$   $[\text{M}+\text{H}]^+$ : 299.0031; Found: 299.0042.

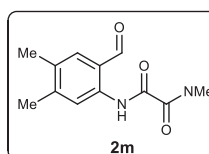

Compound **2m**: white solid.  $^1\text{H}$  NMR (400 MHz,  $\text{CDCl}_3$ )  $\delta$  12.31 (br s, 1H), 9.89 (s, 1H), 8.52 (s, 1H), 7.43 (s, 1H), 3.43 (s, 3H), 3.10 (s, 3H), 2.36 (s, 3H), 2.31 (s, 3H);  $^{13}\text{C}$  NMR (101 MHz,  $\text{CDCl}_3$ )  $\delta$  194.33, 161.93, 160.24, 146.17, 137.19, 136.93, 132.73, 121.22, 121.10, 38.55, 37.47, 20.84, 19.18. HRMS Calcd for  $\text{C}_{13}\text{H}_{16}\text{N}_2\text{O}_3$   $[\text{M}+\text{H}]^+$ : 249.1239; Found: 249.1253.

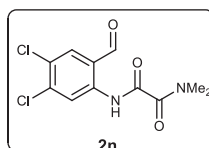

Compound **2n**: white solid.  $^1\text{H}$  NMR (400 MHz,  $\text{CDCl}_3$ )  $\delta$  12.45 (br s, 1H), 9.90 (s, 1H), 8.95 (s, 1H), 7.78 (s, 1H), 3.46 (s, 3H), 3.12 (s, 3H);  $^{13}\text{C}$  NMR (101 MHz,  $\text{CDCl}_3$ )  $\delta$  192.56, 160.89, 160.12, 140.72, 138.10, 136.78, 127.73, 122.46, 121.96, 38.66, 37.86. HRMS Calcd for  $\text{C}_{11}\text{H}_{10}\text{Cl}_2\text{N}_2\text{O}_3$   $[\text{M}+\text{H}]^+$ : 289.0147; Found: 289.0151.

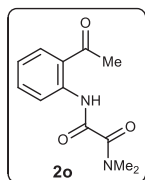

Compound **2o**: white solid.  $^1\text{H}$  NMR (400 MHz,  $\text{CDCl}_3$ )  $\delta$  12.89 (br s, 1H), 8.76 (dd,  $J$  = 8.4, 0.6 Hz, 1H), 7.98 (dd,  $J$  = 8.0, 1.4 Hz, 1H), 7.65 – 7.59 (m, 1H), 7.26 – 7.21 (m, 1H), 3.46 (s, 3H), 3.14 (s, 3H), 2.71 (s, 3H);  $^{13}\text{C}$  NMR (101 MHz,  $\text{CDCl}_3$ )  $\delta$  201.99, 162.21, 160.49, 139.44, 134.82, 131.75, 123.54, 123.28, 120.83, 38.48, 37.30, 28.60. HRMS Calcd for  $\text{C}_{12}\text{H}_{14}\text{N}_2\text{O}_3$   $[\text{M}+\text{H}]^+$ : 235.1083; Found: 235.1093.

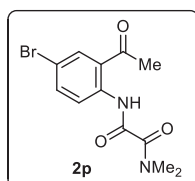

Compound **2p**: white solid.  $^1\text{H}$  NMR (400 MHz,  $\text{CDCl}_3$ )  $\delta$  12.94 (br s, 1H), 8.97 (d,  $J$  = 1.9 Hz, 1H), 7.77 (d,  $J$  = 8.5 Hz, 1H), 7.33 (dd,  $J$  = 8.5, 1.9 Hz, 1H), 3.43 (s, 3H), 3.10 (s, 3H), 2.64 (s, 3H);  $^{13}\text{C}$  NMR (101 MHz,  $\text{CDCl}_3$ )  $\delta$  201.21, 161.64, 160.35, 140.35, 132.76, 129.73, 126.66, 123.62, 121.73, 38.54, 37.52, 28.59. HRMS Calcd for  $\text{C}_{12}\text{H}_{13}\text{BrN}_2\text{O}_3$   $[\text{M}+\text{H}]^+$ : 313.0188; Found: 313.0200.

## 8. Palladium-catalyzed Intramolecular $\delta\text{-C}(\text{sp}^2)\text{-H}$ amination using two oxidants.

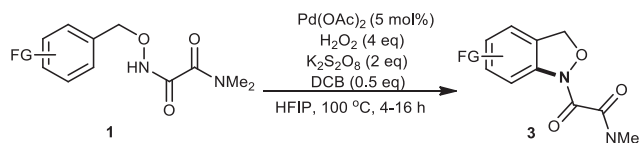

A mixture of **1** (0.2 mmol, 1.0 eq),  $\text{Pd}(\text{OAc})_2$  (2.2 mg, 0.05 eq),  $\text{K}_2\text{S}_2\text{O}_8$  (241.6 mg, 2 eq),  $\text{H}_2\text{O}_2$  (68.0  $\mu\text{L}$ , 0.8 mmol, 4 eq) and HFIP (3 mL) in a 25 mL glass vial sealed with PTFE cap was heated at 100  $^\circ\text{C}$  or 110  $^\circ\text{C}$  for 4-16 hours. The reaction mixture was cooled to room temperature and concentrated *in vacuo*. The resulting residue was purified by column chromatography on silica gel to give the product **3a-3l**.

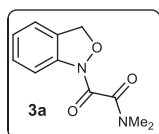

Compound **3a**: Pale yellow oily liquid.  $^1\text{H}$  NMR (400 MHz,  $\text{CDCl}_3$ )  $\delta$  7.85 (d,  $J$  = 7.9 Hz, 1H), 7.36 (t,  $J$  = 7.2 Hz, 1H), 7.23 (dd,  $J$  = 12.1, 4.6 Hz, 2H), 5.47 (s, 2H), 3.08 (s, 3H), 3.06 (s, 3H);  $^{13}\text{C}$  NMR (101 MHz,  $\text{CDCl}_3$ )  $\delta$  162.94, 158.69, 134.99, 128.96, 127.88, 126.20, 121.65, 114.18, 73.51, 37.09, 33.80. HRMS Calcd for  $\text{C}_{11}\text{H}_{12}\text{N}_2\text{O}_3$   $[\text{M}+\text{H}]^+$ : 221.0926; Found: 221.0920.

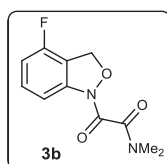

Compound **3b**: Yellow oily liquid.  $^1\text{H}$  NMR (400 MHz,  $\text{CDCl}_3$ )  $\delta$  7.62 (d,  $J$  = 7.5 Hz, 1H), 7.38–7.32 (m, 1H), 6.93 (t,  $J$  = 8.6 Hz, 1H), 5.51 (s, 2H), 3.08 (s, 3H), 3.06 (s, 3H);  $^{13}\text{C}$  NMR (101 MHz,  $\text{CDCl}_3$ )

$\delta$  162.63, 159.03, 156.70 (d,  $J_{C-F} = 247.0$  Hz), 137.45 (d,  $J_{C-F} = 3.0$  Hz), 131.42 (d,  $J_{C-F} = 7.0$  Hz), 114.60 (d,  $J_{C-F} = 24.0$  Hz), 113.22 (d,  $J_{C-F} = 19.0$  Hz), 110.08 (d,  $J_{C-F} = 2.0$  Hz), 71.33, 37.13, 33.90;  $^{19}\text{F}$  NMR (376 MHz,  $\text{CDCl}_3$ )  $\delta$  -116.90. HRMS Calcd for  $\text{C}_{11}\text{H}_{11}\text{FN}_2\text{O}_3[\text{M}+\text{H}]^+$ : 239.0832; Found: 239.0841.

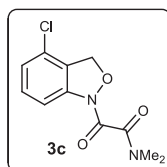

Compound **3c**: Yellow oily liquid.  $^1\text{H}$  NMR (400 MHz,  $\text{CDCl}_3$ )  $\delta$  7.72 (d,  $J = 7.6$  Hz, 1H), 7.31 (t,  $J = 8.0$  Hz, 1H), 7.18 (d,  $J = 8.0$  Hz, 1H), 5.47 (s, 2H), 3.07 (s, 3H), 3.06 (s, 3H);  $^{13}\text{C}$  NMR (101 MHz,  $\text{CDCl}_3$ )  $\delta$  162.55, 159.10, 136.47, 130.72, 128.01, 126.50, 126.08, 112.32, 73.10, 37.11, 33.88. HRMS Calcd for  $\text{C}_{11}\text{H}_{11}\text{ClN}_2\text{O}_3[\text{M}+\text{H}]^+$ : 255.0536; Found: 255.0539.

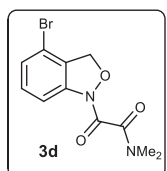

Compound **3d**: Yellow oily liquid.  $^1\text{H}$  NMR (400 MHz,  $\text{CDCl}_3$ )  $\delta$  7.76 (d,  $J = 7.6$  Hz, 1H), 7.33 (d,  $J = 7.8$  Hz, 1H), 7.24 (t,  $J = 7.9$  Hz, 1H), 5.42 (s, 2H), 3.07 (s, 3H), 3.06 (s, 3H);  $^{13}\text{C}$  NMR (101 MHz,  $\text{CDCl}_3$ )  $\delta$  162.46, 159.09, 136.19, 130.76, 128.78, 128.58, 115.48, 112.72, 74.37, 37.05, 33.82. HRMS Calcd for  $\text{C}_{11}\text{H}_{11}\text{BrN}_2\text{O}_3[\text{M}+\text{H}]^+$ : 299.0031; Found: 299.0042.

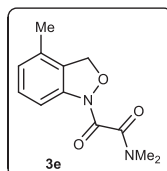

Compound **3e**: Pale yellow oily liquid.  $^1\text{H}$  NMR (400 MHz,  $\text{CDCl}_3$ )  $\delta$  7.65 (d,  $J = 7.8$  Hz, 1H), 7.27–7.23 (m, 1H), 7.00 (d,  $J = 7.6$  Hz, 1H), 5.41 (s, 2H), 3.06 (s, 3H), 3.04 (s, 3H), 2.25 (s, 3H).  $^{13}\text{C}$  NMR (101 MHz,  $\text{CDCl}_3$ )  $\delta$  163.06, 158.66, 134.72, 132.20, 129.15, 127.25, 126.76, 111.57, 73.07, 37.13, 33.85, 18.68. HRMS Calcd for  $\text{C}_{12}\text{H}_{14}\text{N}_2\text{O}_3[\text{M}+\text{H}]^+$ : 235.1083; Found: 235.1089.

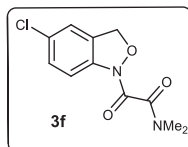

Compound **3f**: Yellow oily liquid.  $^1\text{H}$  NMR (400 MHz,  $\text{CDCl}_3$ )  $\delta$  7.77 (d,  $J = 8.3$  Hz, 1H), 7.33 (d,  $J = 8.4$  Hz, 1H), 7.23 (s, 1H), 5.44 (s, 2H), 3.07 (s, 3H), 3.05 (s, 3H);  $^{13}\text{C}$  NMR (101 MHz,  $\text{CDCl}_3$ )  $\delta$  162.65, 158.85, 133.94, 131.51, 129.77, 129.17, 122.12, 115.12, 73.12, 37.16, 33.93. HRMS Calcd for  $\text{C}_{11}\text{H}_{11}\text{ClN}_2\text{O}_3[\text{M}+\text{H}]^+$ : 255.0536; Found: 255.0537.

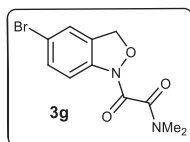

Compound **3g**: Yellow oily liquid.  $^1\text{H}$  NMR (400 MHz,  $\text{CDCl}_3$ )  $\delta$  7.72 (d,  $J = 8.3$  Hz, 1H), 7.47 (d,  $J = 8.3$  Hz, 1H), 7.39 (s, 1H), 5.44 (s, 2H), 3.07 (s, 3H), 3.05 (s, 3H);  $^{13}\text{C}$  NMR (101 MHz,  $\text{CDCl}_3$ )  $\delta$  162.63, 158.89, 134.42, 132.07, 130.07, 124.99, 118.87, 115.48, 72.99, 37.16, 33.92. HRMS Calcd for  $\text{C}_{11}\text{H}_{11}\text{BrN}_2\text{O}_3$   $[\text{M}+\text{H}]^+$ : 299.0031; Found: 299.0040.

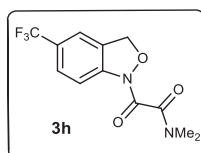

Compound **3h**: Yellow oily liquid.  $^1\text{H}$  NMR (400 MHz,  $\text{CDCl}_3$ )  $\delta$  7.92 (d,  $J = 8.1$  Hz, 1H), 7.64 (d,  $J = 8.3$  Hz, 1H), 7.52 (s, 1H), 5.52 (s, 2H), 3.08 (s, 3H), 3.06 (s, 3H);  $^{13}\text{C}$  NMR (101 MHz,  $\text{CDCl}_3$ )  $\delta$  162.36, 159.26, 137.81, 128.61 (q,  $J_{\text{C-F}} = 32.0$  Hz), 127.86 (d,  $J_{\text{C-F}} = 6.0$  Hz), 126.87 (q,  $J_{\text{C-F}} = 3.0$  Hz), 123.77 (d,  $J_{\text{C-F}} = 270.0$  Hz), 119.21, 114.04, 73.20, 37.09, 33.88;  $^{19}\text{F}$  NMR (376 MHz,  $\text{CDCl}_3$ )  $\delta$  -61.97. HRMS Calcd for  $\text{C}_{12}\text{H}_{11}\text{F}_3\text{N}_2\text{O}_3$   $[\text{M}+\text{H}]^+$ : 289.0800; Found: 289.0813.

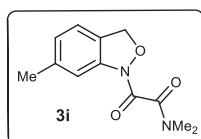

Compound **3i**: Pale yellow oily liquid.  $^1\text{H}$  NMR (400 MHz,  $\text{CDCl}_3$ )  $\delta$  7.68 (s, 1H), 7.11 (d,  $J = 7.7$  Hz, 1H), 7.02 (d,  $J = 7.7$  Hz, 1H), 5.41 (s, 2H), 3.06 (s, 3H), 3.04 (s, 3H), 2.39 (s, 3H);  $^{13}\text{C}$  NMR (101 MHz,  $\text{CDCl}_3$ )  $\delta$  163.04, 158.60, 139.42, 135.23, 126.97, 125.13, 121.28, 114.75, 73.52, 37.12, 33.85, 21.57. HRMS Calcd for  $\text{C}_{12}\text{H}_{14}\text{N}_2\text{O}_3$   $[\text{M}+\text{H}]^+$ : 235.1083; Found: 235.1088.

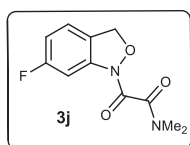

Compound **3j**: Brown oily liquid.  $^1\text{H}$  NMR (400 MHz,  $\text{CDCl}_3$ )  $\delta$  7.59 (d,  $J = 8.2$  Hz, 1H), 7.18 (dd,  $J = 8.2, 4.9$  Hz, 1H), 6.92 (m, 1H), 5.43 (s, 2H), 3.07 (s, 3H), 3.05 (s, 3H);  $^{13}\text{C}$  NMR (101 MHz,  $\text{CDCl}_3$ )  $\delta$  162.98 (d,  $J_{\text{C-F}} = 245.0$  Hz), 162.56, 158.91, 136.39 (d,  $J_{\text{C-F}} = 12.0$  Hz), 123.19 (d,  $J_{\text{C-F}} = 3.0$  Hz), 122.59 (d,  $J_{\text{C-F}} = 10.0$  Hz), 113.01 (d,  $J_{\text{C-F}} = 24.0$  Hz), 102.68 (d,  $J_{\text{C-F}} = 29.0$  Hz), 73.37, 37.12, 33.88.  $^{19}\text{F}$  NMR (376 MHz,  $\text{CDCl}_3$ )  $\delta$  -111.63. HRMS Calcd for  $\text{C}_{11}\text{H}_{11}\text{FN}_2\text{O}_3$   $[\text{M}+\text{H}]^+$ : 239.0832; Found: 239.0838.

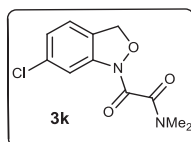

Compound **3k**: Brown oily liquid.  $^1\text{H}$  NMR (400 MHz,  $\text{CDCl}_3$ )  $\delta$  7.87 (s, 1H), 7.20 (dd,  $J = 8.1, 1.7$  Hz, 1H), 7.16 (d,  $J = 8.1$  Hz, 1H), 5.43 (s, 2H), 3.07 (s, 3H), 3.05 (s, 3H);  $^{13}\text{C}$  NMR (101 MHz,  $\text{CDCl}_3$ )  $\delta$  162.53, 158.97, 136.27, 134.95, 126.36, 126.27, 122.50, 114.58, 73.36, 37.14, 33.91. HRMS Calcd for  $\text{C}_{11}\text{H}_{11}\text{ClN}_2\text{O}_3$   $[\text{M}+\text{H}]^+$ : 255.0536; Found: 255.0548.

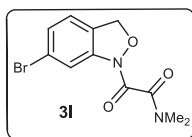

Compound **3l**: Brown oily liquid.  $^1\text{H}$  NMR (400 MHz,  $\text{CDCl}_3$ )  $\delta$  8.02 (s, 1H), 7.35 (dd,  $J$  = 8.0, 1.6 Hz, 1H), 7.12 (d,  $J$  = 8.0 Hz, 1H), 5.41 (s, 2H), 3.07 (s, 3H), 3.05 (s, 2H);  $^{13}\text{C}$  NMR (101 MHz,  $\text{CDCl}_3$ )  $\delta$  162.47, 158.90, 136.33, 129.14, 126.95, 122.90, 122.47, 117.18, 73.37, 37.08, 33.85. HRMS Calcd for  $\text{C}_{11}\text{H}_{11}\text{BrN}_2\text{O}_3$   $[\text{M}+\text{H}]^+$ : 299.0031; Found: 299.0041.

## 9. The removal and transformation of directing group.

### 9.1 The removal of directing group<sup>[6]</sup>

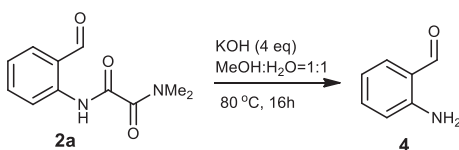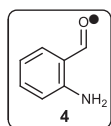

Compound **4**: **2a** (66.0 mg, 0.3 mmol, 1.0 eq) was dissolved in a mixture of MeOH/ $\text{H}_2\text{O}$  (1:1) 2 mL, KOH (67.3 mg, 1.2 mmol, 4.0 eq) was then added. The mixture was heated to 80 °C and stirred for 16 hours. Water was added and the mixture was extracted with DCM. The combined organic layers were washed with water and brine, dried over anhydrous  $\text{Na}_2\text{SO}_4$ , and concentrated *in vacuo*. The residue was purified by column chromatography on silica gel to give the product **4** (30.9 mg, yield 88%), Pale yellow solid  $^1\text{H}$  NMR (400 MHz,  $\text{CDCl}_3$ )  $\delta$  9.86 (s, 1H), 7.47 (d,  $J$  = 7.6 Hz, 1H), 7.29 (dd,  $J$  = 15.3, 7.8 Hz, 1H), 6.74 (t,  $J$  = 7.3 Hz, 1H), 6.64 (d,  $J$  = 8.3 Hz, 1H), 6.14 (br s, 2H);  $^{13}\text{C}$  NMR (101 MHz,  $\text{CDCl}_3$ )  $\delta$  194.16, 150.00, 135.79, 135.27, 118.86, 116.40, 116.09.  $\text{C}_7\text{H}_7\text{NO}$  CAS: 529-23-7.

### 9.2 Synthesis of quinoline or quinazoline derivatives **5**, **6**, **7**, **8** through transformation of directing group.

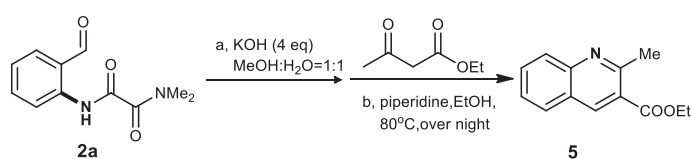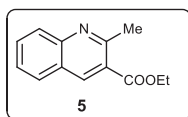

Compound **5**<sup>[7]</sup>: **Step A**: **2a** (66.0 mg, 0.3 mmol, 1.0 eq) was dissolved in a mixture of MeOH/ $\text{H}_2\text{O}$ =1:1 (2 mL), KOH (67.3 mg, 1.2 mmol, 4.0 eq) was added. The mixture was heated to 80 °C and stirred for 16 hours. Water (1 mL) was added and the mixture was extracted with DCM. The combined organic layers were washed with water and brine, dried over anhydrous  $\text{Na}_2\text{SO}_4$ , and concentrated *in vacuo*. The residue was purified by column chromatography on silica gel to give *o*-Aminobenzaldehyde. **Step B**: The title compound (30.9 mg, 0.26 mmol) from **step A** and molecular sieves 4 Å (0.1 g), absolute ethanol (1 mL), ethyl acetoacetate (40.0  $\mu\text{L}$ , 0.31 mmol, 1.2 equiv) and piperidine in catalytic amount was stirred at 60 °C for 24 hours. The solution was diluted with  $\text{CH}_2\text{Cl}_2$  and molecular sieves were filtered on a pad of Celite. The mixture was concentrated *in vacuo* and the resulting residue was purified by flash column chromatography to give the product **5** as a yellow solid (48.4 mg, yield 75 %).  $^1\text{H}$  NMR (400 MHz,  $\text{CDCl}_3$ )  $\delta$  8.69 (s, 1H), 8.01 (d,  $J$  = 8.5 Hz, 1H), 7.82 (d,  $J$  = 8.0 Hz, 1H), 7.74 (m, 1H), 7.50 (t,  $J$  = 7.5 Hz, 1H), 4.41 (q,  $J$  = 7.1 Hz, 2H), 2.97 (s, 3H), 1.43 (t,  $J$  =



7.1 Hz, 3H);  $^{13}\text{C}$  NMR (101 MHz,  $\text{CDCl}_3$ )  $\delta$  166.50, 158.45, 148.61, 139.86, 131.63, 128.53, 128.46, 126.50, 125.75, 123.91, 61.38, 25.71, 14.35. HRMS Calcd for  $\text{C}_{13}\text{H}_{13}\text{NO}_2$   $[\text{M}+\text{H}]^+$ : 216.1025; Found: 216.1037.  $\text{C}_{13}\text{H}_{13}\text{NO}_2$  CAS: 15785-08-7.

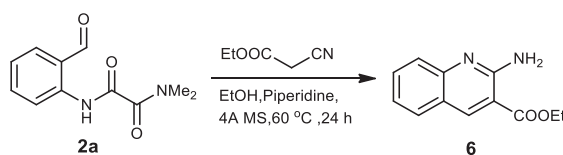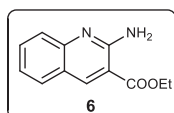

Compound **6**<sup>[8]</sup>: A mixture of **2a** (66.0 mg, 0.3 mmol, 1.0 equiv), molecular sieves 4 Å (0.1 g), absolute methanol (2 mL), ethyl cyanoacetate (38  $\mu\text{L}$ , 0.36 mmol, 1.2 equiv) and piperidine in catalytic amount was stirred at 60 °C for 24 hours. The solution was diluted with  $\text{CH}_2\text{Cl}_2$  and molecular sieves were filtered on a pad of Celite. The mixture was concentrated under vacuum and the resulting residue was purified by flash column chromatography to give the product **6** as a yellow solid (56.4 mg, yield 87%).  $^1\text{H}$  NMR (400 MHz,  $\text{CDCl}_3$ )  $\delta$  8.68 (s, 1H), 7.65 (d,  $J$  = 8.0 Hz, 1H), 7.62 – 7.56 (m, 2H), 7.22 (m, 1H), 6.67 (br s, 2H), 4.40 (q,  $J$  = 7.1 Hz, 2H), 1.43 (t,  $J$  = 7.1 Hz, 3H);  $^{13}\text{C}$  NMR (101 MHz,  $\text{CDCl}_3$ )  $\delta$  166.65, 156.72, 150.23, 142.66, 132.62, 129.11, 125.63, 122.76, 122.47, 110.34, 61.42, 14.38.  $\text{C}_{12}\text{H}_{12}\text{N}_2\text{O}_2$  CAS: 36926-83-7.

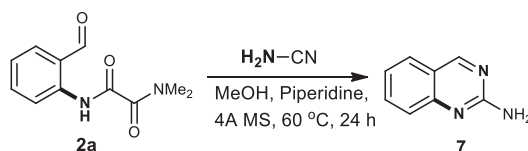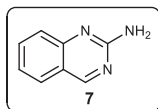

Compound **7**<sup>[8]</sup>: A mixture of **2a** (66.0 mg, 0.3 mmol, 1.0 equiv), molecular sieves 4 Å (0.1 g), absolute methanol (2 mL), cyanamide (24  $\mu\text{L}$ , 0.36 mmol, 1.2 equiv) and piperidine in catalytic amount was stirred at 60 °C for 24 hours. The solution was diluted with  $\text{CH}_2\text{Cl}_2$  and molecular sieves were filtered on a pad of Celite. The mixture was concentrated under vacuum and the resulting residue was purified by flash column chromatography to give the product **7** as a yellow solid (31.4 mg, yield 72%).  $^1\text{H}$  NMR (400 MHz,  $\text{CDCl}_3$ )  $\delta$  9.04 (s, 1H), 7.75 – 7.69 (m, 2H), 7.58 (d,  $J$  = 8.9 Hz, 1H), 7.32 – 7.27 (m, 1H), 5.29 (br s, 2H);  $^{13}\text{C}$  NMR (101 MHz,  $\text{CDCl}_3$ )  $\delta$  162.69, 160.25, 152.06, 134.63, 127.70, 125.53, 123.44, 120.52.  $\text{C}_8\text{H}_7\text{N}_3$  CAS :1687-51-0

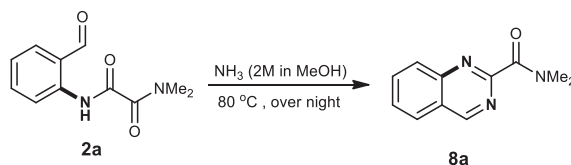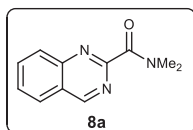

Compound **8a**<sup>[9]</sup>: A solution of Ammonia (2 M in methanol)(0.5 ml, 1.0 mmol) was dropwise with reusable syringe in a 25 ml glass vial with **2a** (66.0 mg, 0.3 mmol, 1.0 eq) at 0 °C in 5 mins. Then the tube was sealed and heated at 80 °C, over night. The mixture was cooled to room temperature and filtered on a pad of Celite. The filtrate was concentrated *in vacuo*, and the resulting residue was purified by flash column chromatography to give the product **8**, yield 92 % . Colorless oily liquid .  $^1\text{H}$  NMR (400 MHz,  $\text{CDCl}_3$ )  $\delta$  9.45 (s, 1H), 8.06 (d,  $J$  = 8.5 Hz, 1H), 7.95 (t,  $J$  = 7.7 Hz, 2H), 7.70 (t,  $J$  = 7.5 Hz, 1H), 3.17 (s, 3H), 2.97 (s, 3H);  $^{13}\text{C}$  NMR (101 MHz,  $\text{CDCl}_3$ )  $\delta$  167.18, 161.00, 158.62, 149.78,

134.95, 128.80, 128.69, 127.32, 124.27, 38.46, 35.13. HRMS Calcd for  $C_{11}H_{11}N_3O$   $[M+H]^+$ : 202.0980; Found: 202.0989.  $C_{11}H_{11}N_3O$  CAS:1373887-71-8.

## 10. Synthesis of quinazolines from benzyl alcohols in one pot.

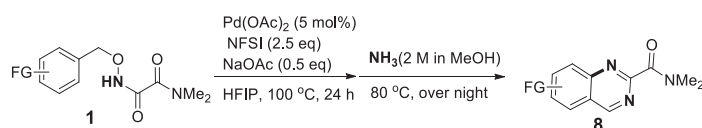

A mixture of (*N,N*-dimethyl)oxamoyl amide-protected benzyl alcohol substrate (0.3 mmol, 1.0 eq),  $Pd(OAc)_2$  (2.2 mg, 0.05 eq), NFSI (156.7 mg, 0.75 mmol, 2.5 eq), NaOAc (12.3 mg, 0.15 mmol, 0.5 eq) and HFIP (4.5 mL) in a 25 mL glass vial sealed and heated at 100 °C for 24 hours. Then the reaction mixture was cooled to room temperature, a solution of 0.5 ml ammonia (2 M in methanol) was dropwised with reusable syringe at 0 °C in 5 mins, After stirring another 5 mins, the glass vial was heated at 80 °C, over night. The mixture was cooled and filtered on a pad of Celite. The filtrate was concentrated *in vacuo*, and the resulting residue was purified by flash column chromatography to give the product **8a-8f**.

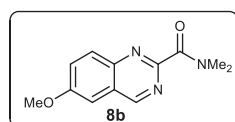

Compound **8b**: Pale yellow oily liquid.  $^1H$  NMR (400 MHz,  $CDCl_3$ )  $\delta$  9.36 (s, 1H), 7.99 (d,  $J$  = 9.2 Hz, 1H), 7.61 (dd,  $J$  = 9.2, 2.8 Hz, 1H), 7.18 (d,  $J$  = 2.7 Hz, 1H), 3.98 (s, 3H), 3.20 (s, 3H), 3.01 (s, 3H);  $^{13}C$  NMR (101 MHz,  $CDCl_3$ )  $\delta$  167.44, 159.39, 159.13, 156.80, 146.08, 130.29, 128.21, 125.53, 103.93, 55.99, 38.64, 35.33. HRMS Calcd for  $C_{12}H_{13}N_3O_2$   $[M+H]^+$ : 232.1086; Found: 232.1094.

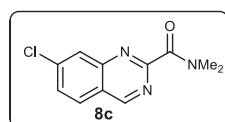

Compound **8c**: White solid.  $^1H$  NMR (400 MHz,  $CDCl_3$ )  $\delta$  9.46 (s, 1H), 8.09 (d,  $J$  = 1.8 Hz, 1H), 7.94 (d,  $J$  = 8.7 Hz, 1H), 7.69 (dd,  $J$  = 8.7, 1.9 Hz, 1H), 3.21 (s, 3H), 3.01 (s, 3H);  $^{13}C$  NMR (101 MHz,  $CDCl_3$ )  $\delta$  166.84, 160.80, 159.50, 150.33, 141.43, 130.14, 128.64, 127.88, 122.65, 38.47, 35.21. HRMS Calcd for  $C_{11}H_{10}ClN_3O$   $[M+H]^+$ : 236.0591; Found: 236.0602.

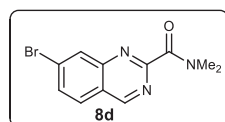

Compound **8d**: White solid.  $^1H$  NMR (400 MHz,  $CDCl_3$ )  $\delta$  9.45 (s, 1H), 8.28 (d,  $J$  = 0.7 Hz, 1H), 7.85 (d,  $J$  = 8.6 Hz, 1H), 7.82 (dd,  $J$  = 8.7, 1.7 Hz, 1H), 3.20 (s, 3H), 2.99 (s, 3H);  $^{13}C$  NMR (101 MHz,  $CDCl_3$ )  $\delta$  166.84, 160.98, 159.47, 150.42, 132.69, 131.31, 130.04, 128.51, 122.90, 38.49, 35.23. HRMS Calcd for  $C_{11}H_{10}BrN_3O$   $[M+H]^+$ : 280.0085; Found: 280.0084.

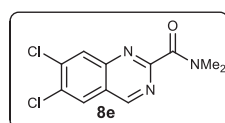

Compound **8e**: White solid.  $^1\text{H}$  NMR (400 MHz,  $\text{CDCl}_3$ )  $\delta$  9.41 (s, 1H), 8.22 (s, 1H), 8.10 (s, 1H), 3.20 (s, 3H), 2.98 (s, 3H);  $^{13}\text{C}$  NMR (101 MHz,  $\text{CDCl}_3$ )  $\delta$  166.60, 159.97, 159.51, 148.44, 140.40, 133.86, 130.08, 127.90, 123.18, 38.48, 35.26. HRMS Calcd for  $\text{C}_{11}\text{H}_9\text{Cl}_2\text{N}_3\text{O}$   $[\text{M}+\text{H}]^+$ : 270.0201; Found: 270.0214.

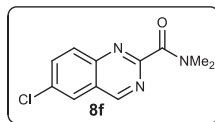

Compound **8f**: White solid.  $^1\text{H}$  NMR (400 MHz,  $\text{CDCl}_3$ )  $\delta$  9.40 (s, 1H), 8.03 (d,  $J = 9.0$  Hz, 1H), 7.96 (d,  $J = 2.1$  Hz, 1H), 7.88 (dd,  $J = 9.0, 2.3$  Hz, 1H), 3.18 (s, 3H), 2.98 (s, 3H);  $^{13}\text{C}$  NMR (101 MHz,  $\text{CDCl}_3$ )  $\delta$  166.85, 160.09, 158.80, 148.30, 136.02, 134.64, 130.49, 126.01, 124.73, 38.48, 35.22. HRMS Calcd for  $\text{C}_{11}\text{H}_{10}\text{ClN}_3\text{O}$   $[\text{M}+\text{H}]^+$ : 236.0591; Found: 236.0600.

## 11. Preliminary mechanism study: role of NFSI

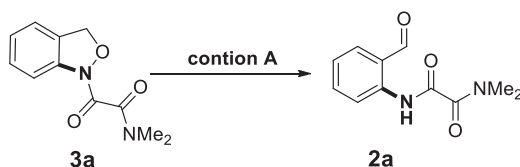

| Entry            | $\text{Pd}(\text{OAc})_2$ | NFSI   | NaOAc  | GC (%) | Yield (%) |
|------------------|---------------------------|--------|--------|--------|-----------|
| 1                | 5 mol %                   | —      | —      |        |           |
| 2                | —                         | 2.5 eq | —      | 53     |           |
| 3                | —                         | —      | 0.5 eq | 0      |           |
| 4                | 5 mol %                   | 2.5 eq | —      | 64     |           |
| 5                | 5 mol %                   | 2.5 eq | 0.5 eq | 83     |           |
| 6 <sup>[a]</sup> | —                         | 2.5 eq | —      | 67     |           |
| 7 <sup>[a]</sup> | —                         | 2.5 eq | 0.5 eq | 80     |           |

**Condition A:** **3a** (0.1 mmol, 1eq),  $\text{Pd}(\text{OAc})_2$  (0.005 mmol), NFSI (0.25 mmol, 2.5 eq), NaOAc (0.05 mmol, 0.5 eq), 12 h. [a] 24 h. Yield was base on GC using tridecane as the internal standard.

## 12. Proposed catalytic cycle for Palladium-catalyzed

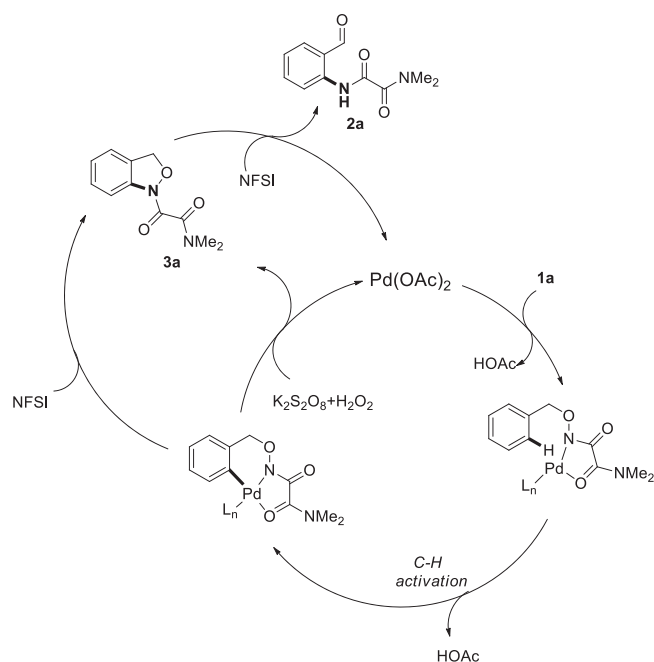

### 13. References

- [1] G. He, C. Lu, Y.S. Zhao, William A. Nack and G. Chen, *Org. Lett.*, 2012, **14**, 2944–2947.
- [2] Lukas O. Dialer, Svetlana V. Selivanova, Carmen J. Müller, A. Müller, T. Stellfeld, K. Graham, Ludger M. Dinkelborg, Stefanie D. Krämer, R. Schibli, M. Reiher and Simon M. Ametamey, *J. Med. Chem.*, 2013, **56**, 7552–7563.
- [3] L. H. Zhou, W. J. Lu, *Org. Lett.*, 2014, **16**, 508–511.
- [4] C. Wang, C. P. Chen, J. Y. Zhang, J. Han, Q. Wang, K. Guo, P. Liu, M. Y. Guan, Y. M. Yao, and Y. S. Zhao, *Angew. Chem. Int. Ed.* 2014, **53**, 9884–9888.
- [5] K Guo, X. L. Chen, M. Y. Guan and Y. S. Zhao, *Org. Lett.* 2015, **17**, 1802–1805.
- [6] W. Williams, X. Sun and D. Jebaratnam, *J. Org. Chem.* 1997, **62**, 4364–4369.
- [7] Q. Shen, L. M. Wang, J. J. Yu, M. T. Liu, J. Qiu, L. Fang and F. L. Guo, *Synthesis*. 2012, **44**, 389–392.
- [8] G. Viault, D. Gree, T. Roisnel, S. Chandrasekhar and R. Gree, *Tetrahedron*, 2009, **65**, 10149–10154.
- [9] Edmondson, Scott, D.. novel pyrrolidine derived beta 3 adrenergic receptor agonist [P]. US2011025690, 2011-03-03.

## 14. NMR spectra

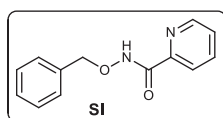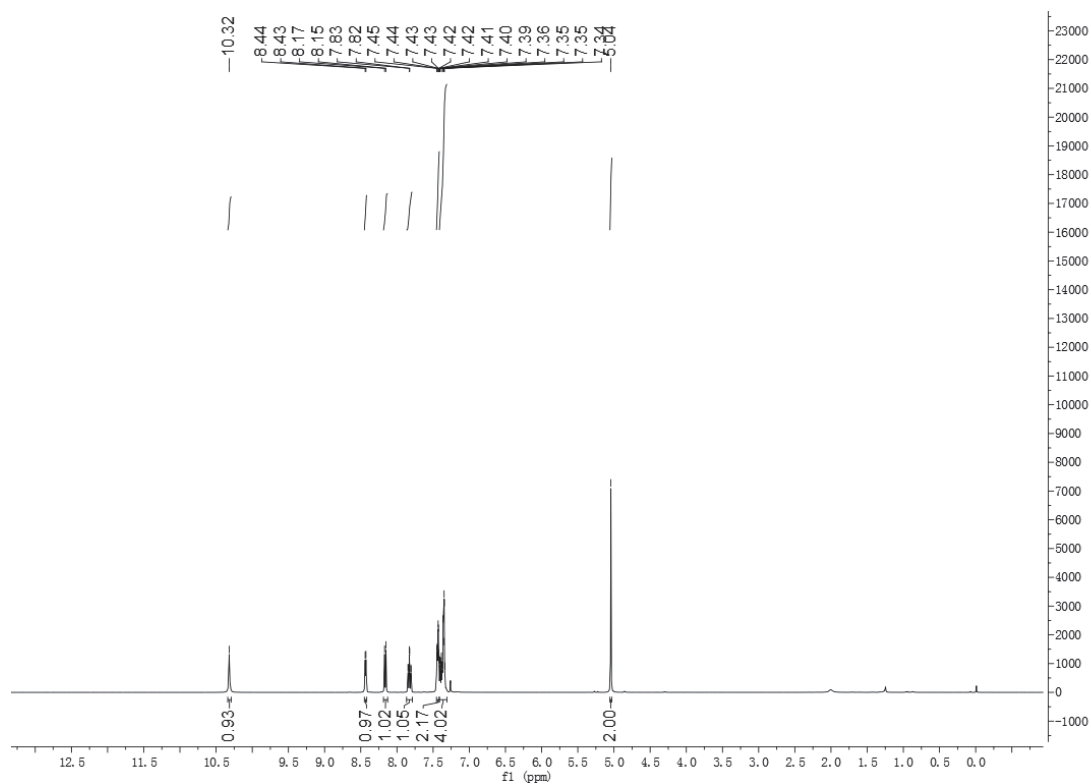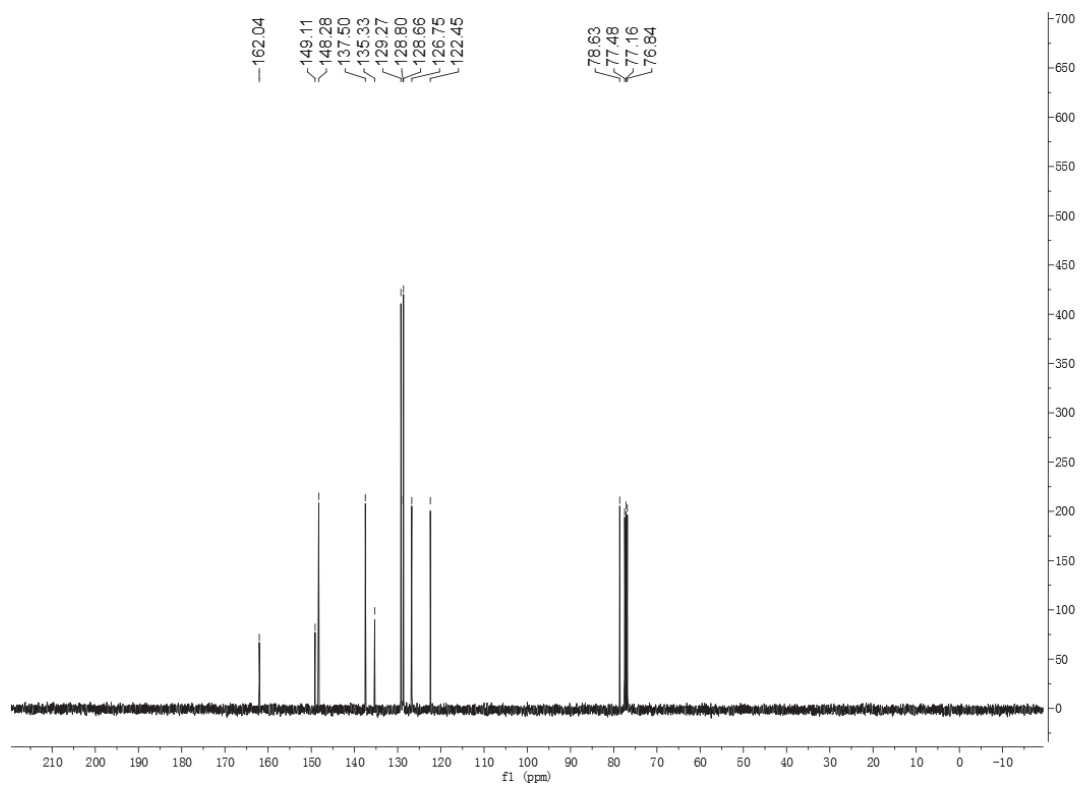

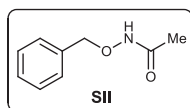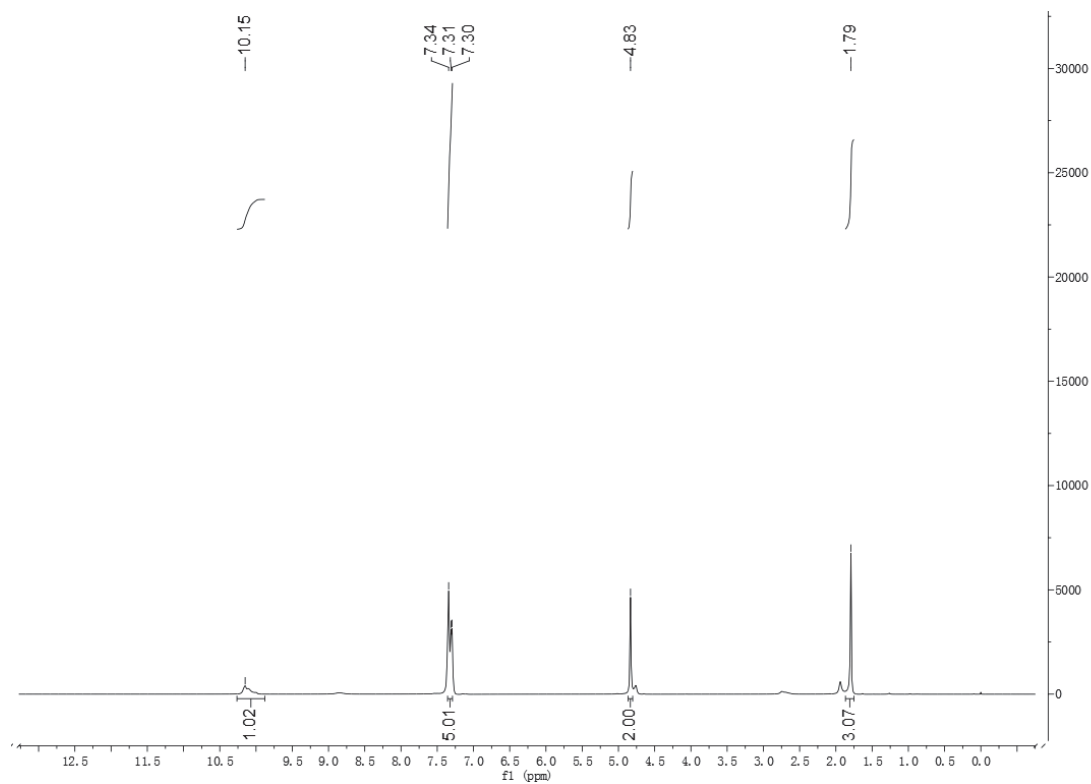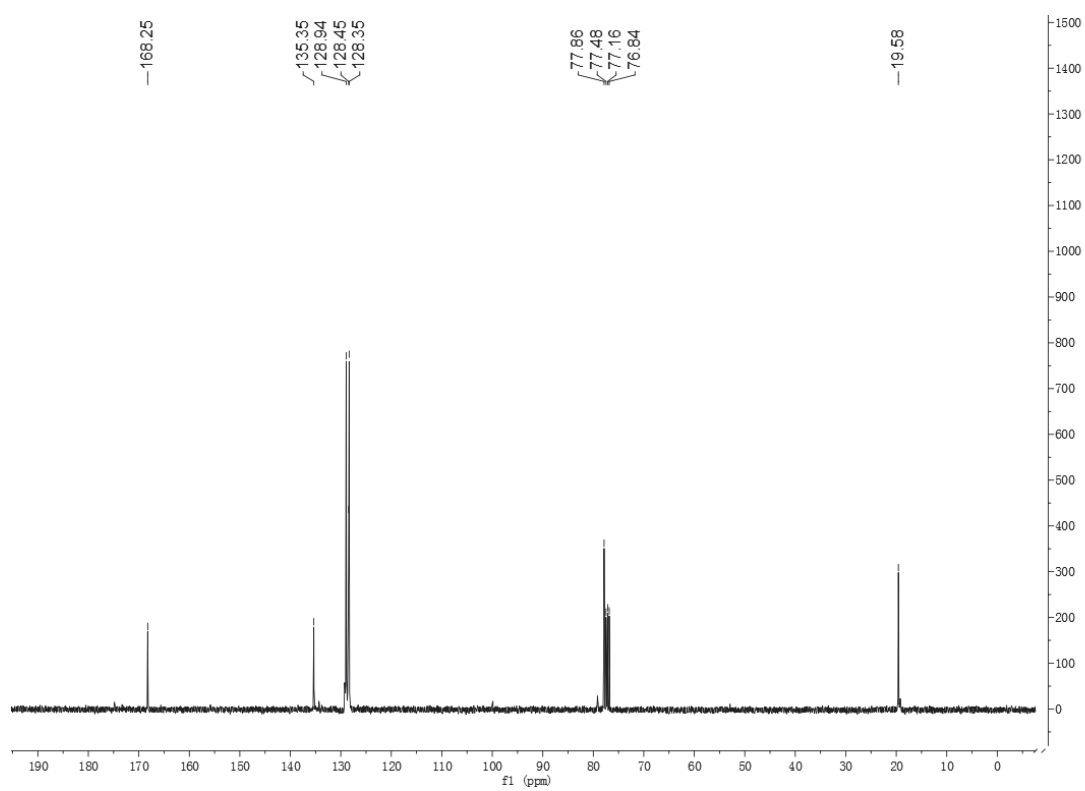

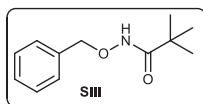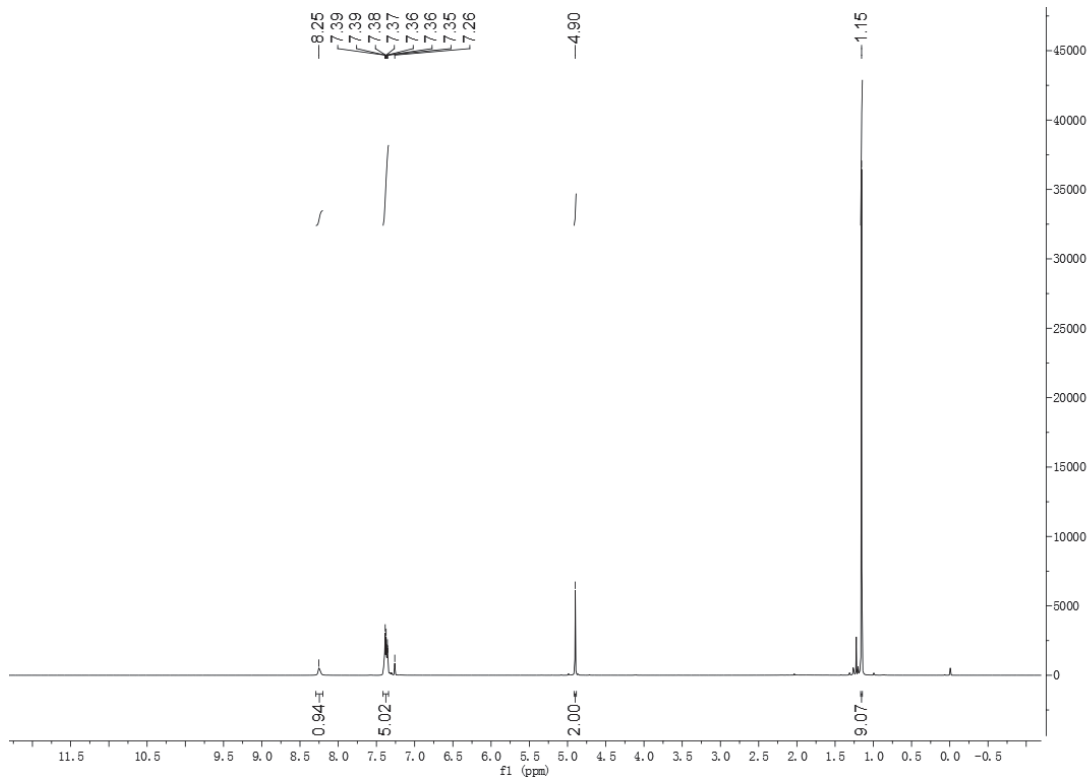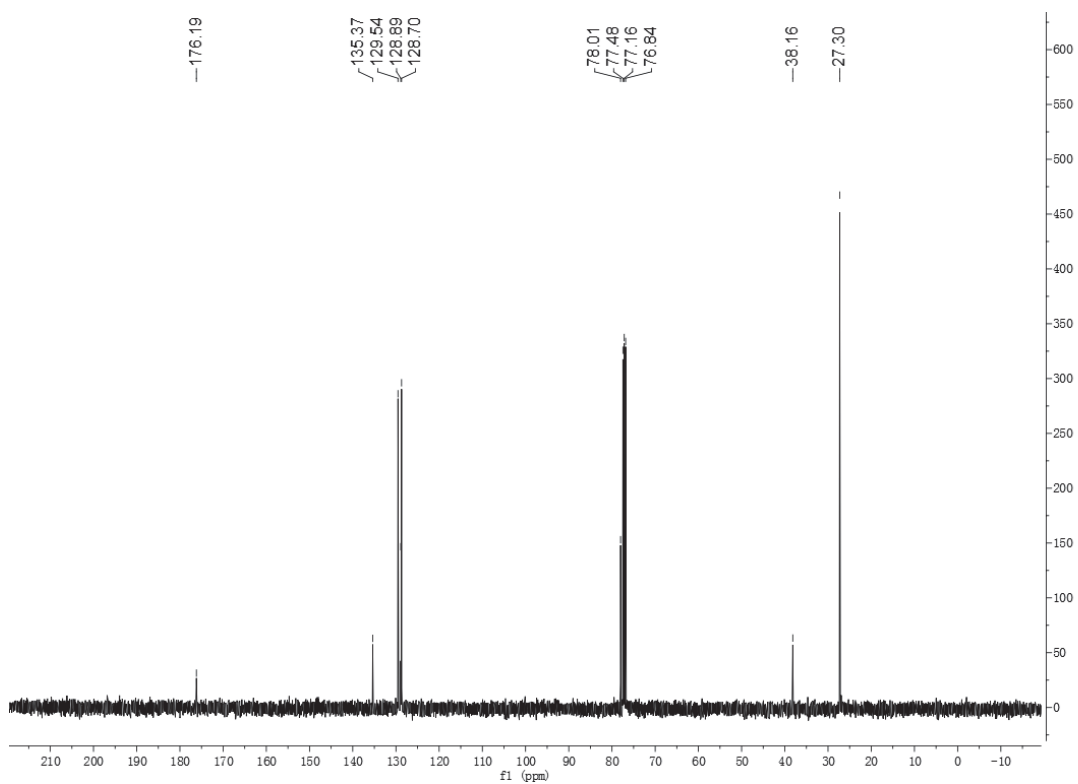



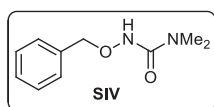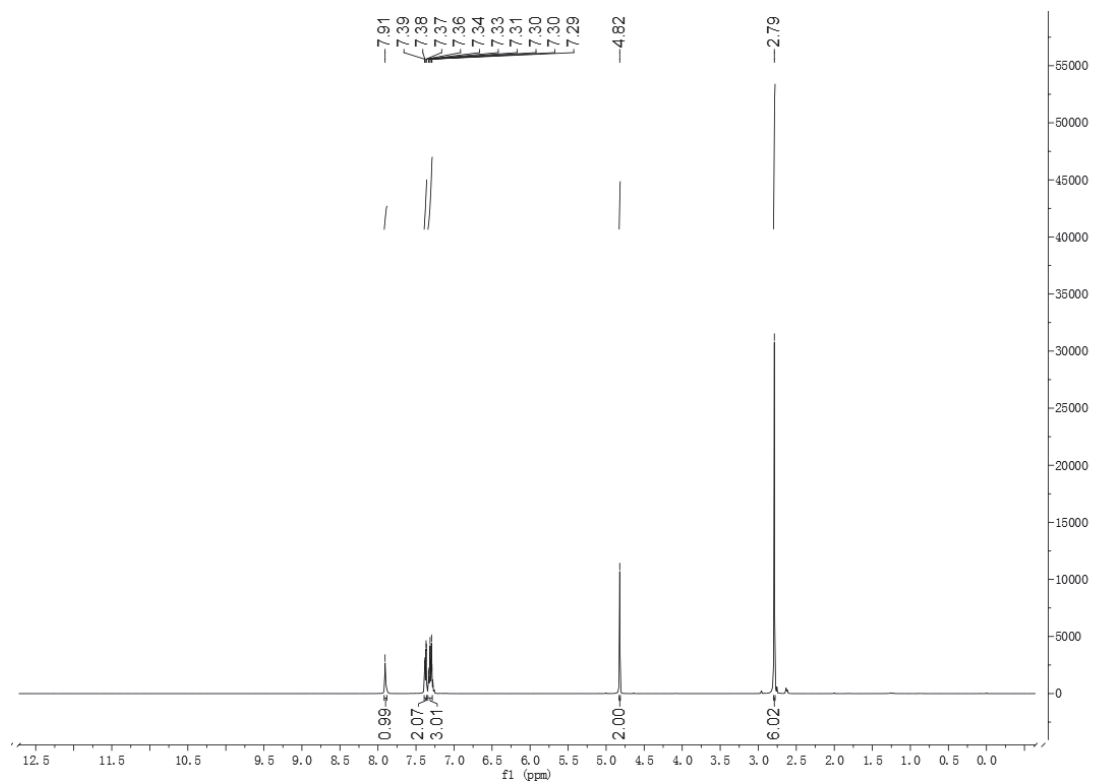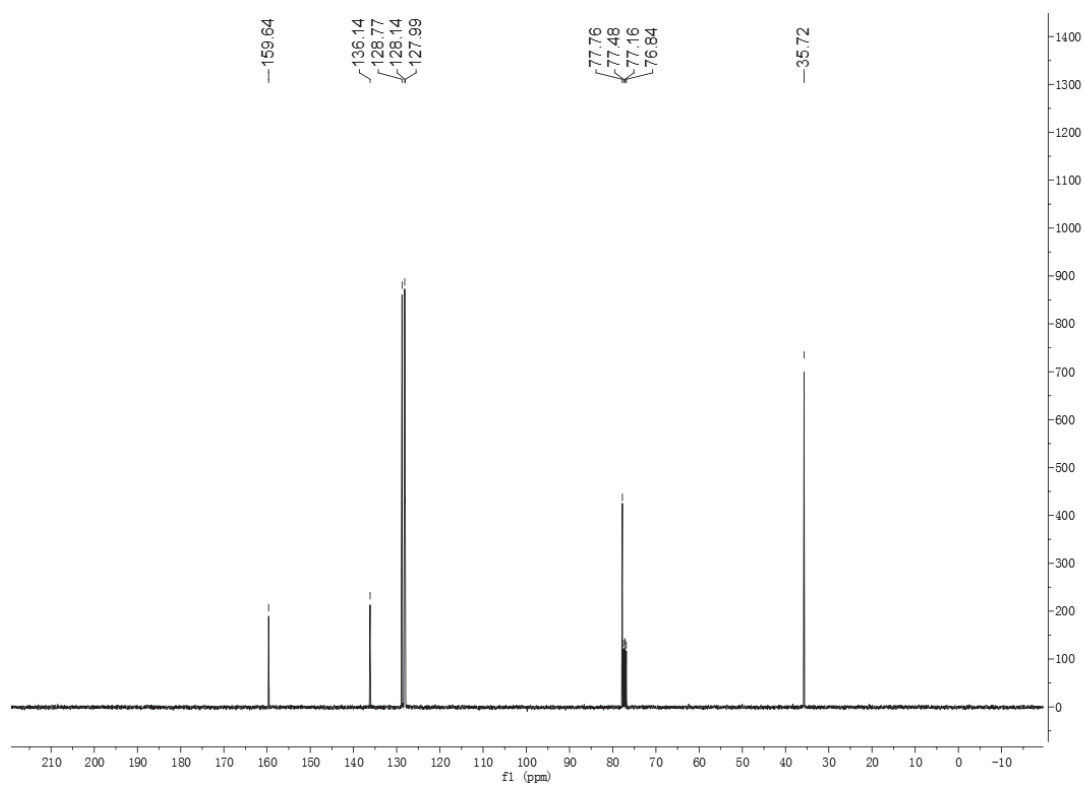

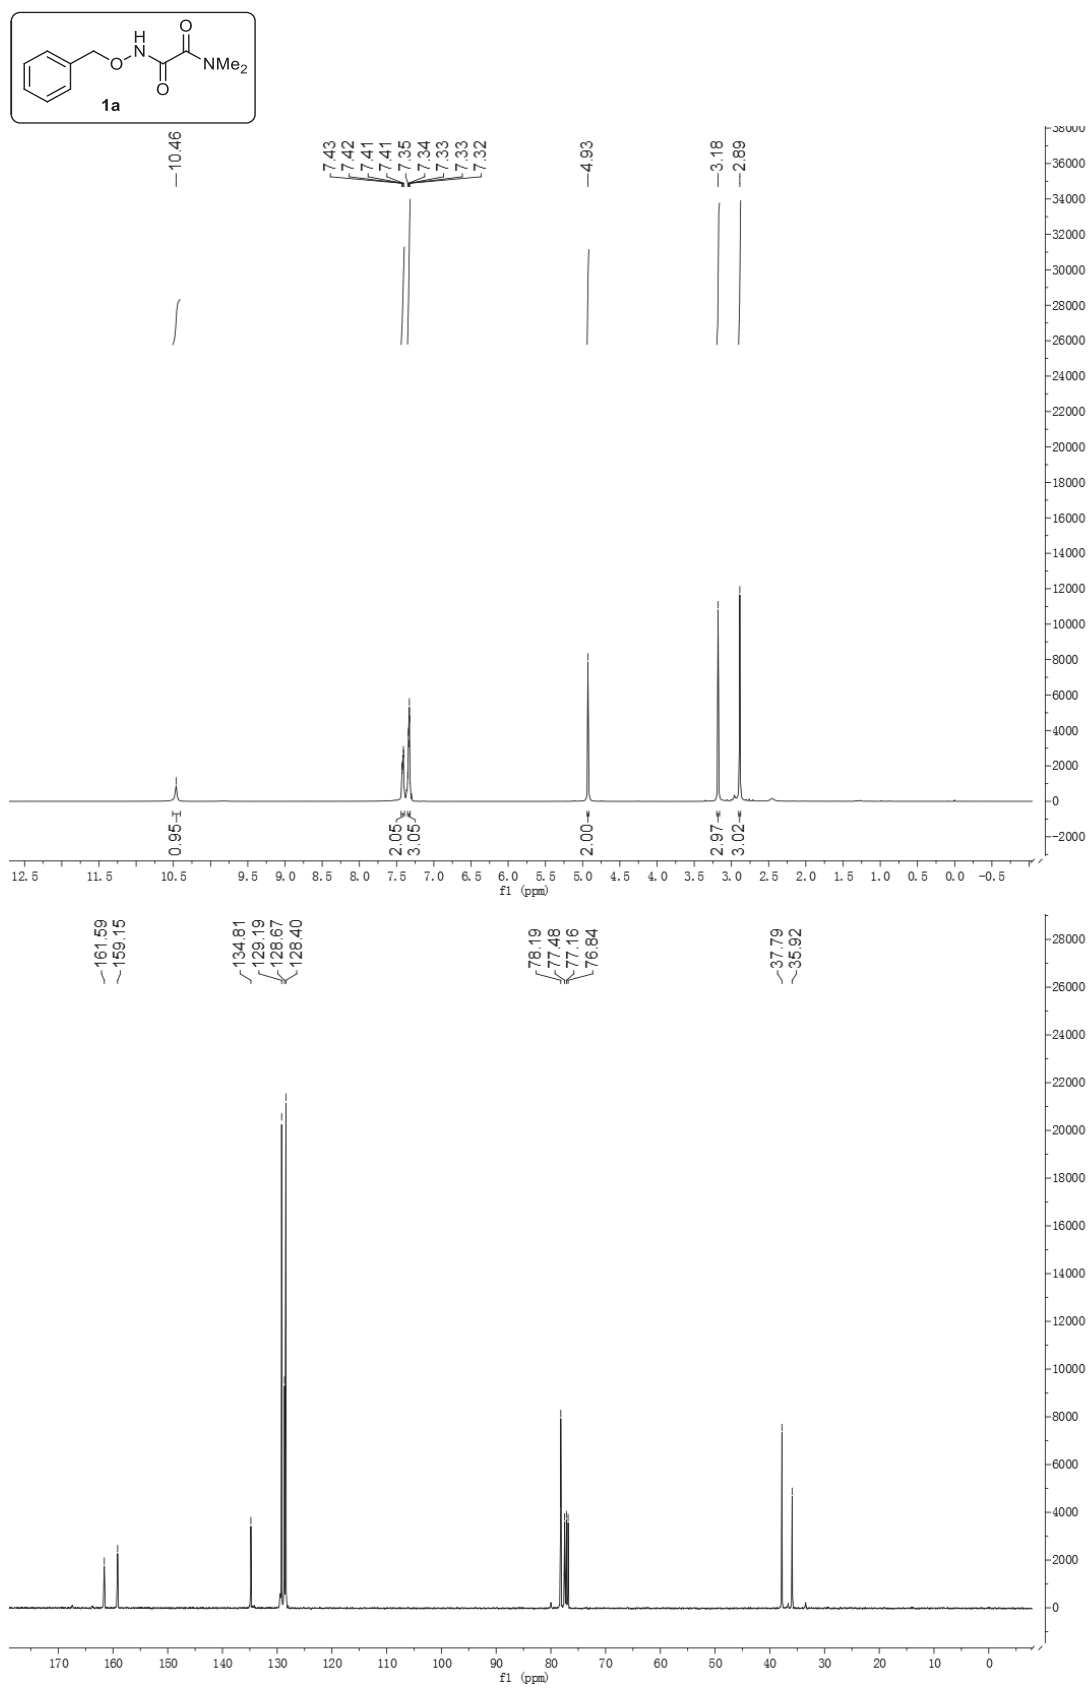

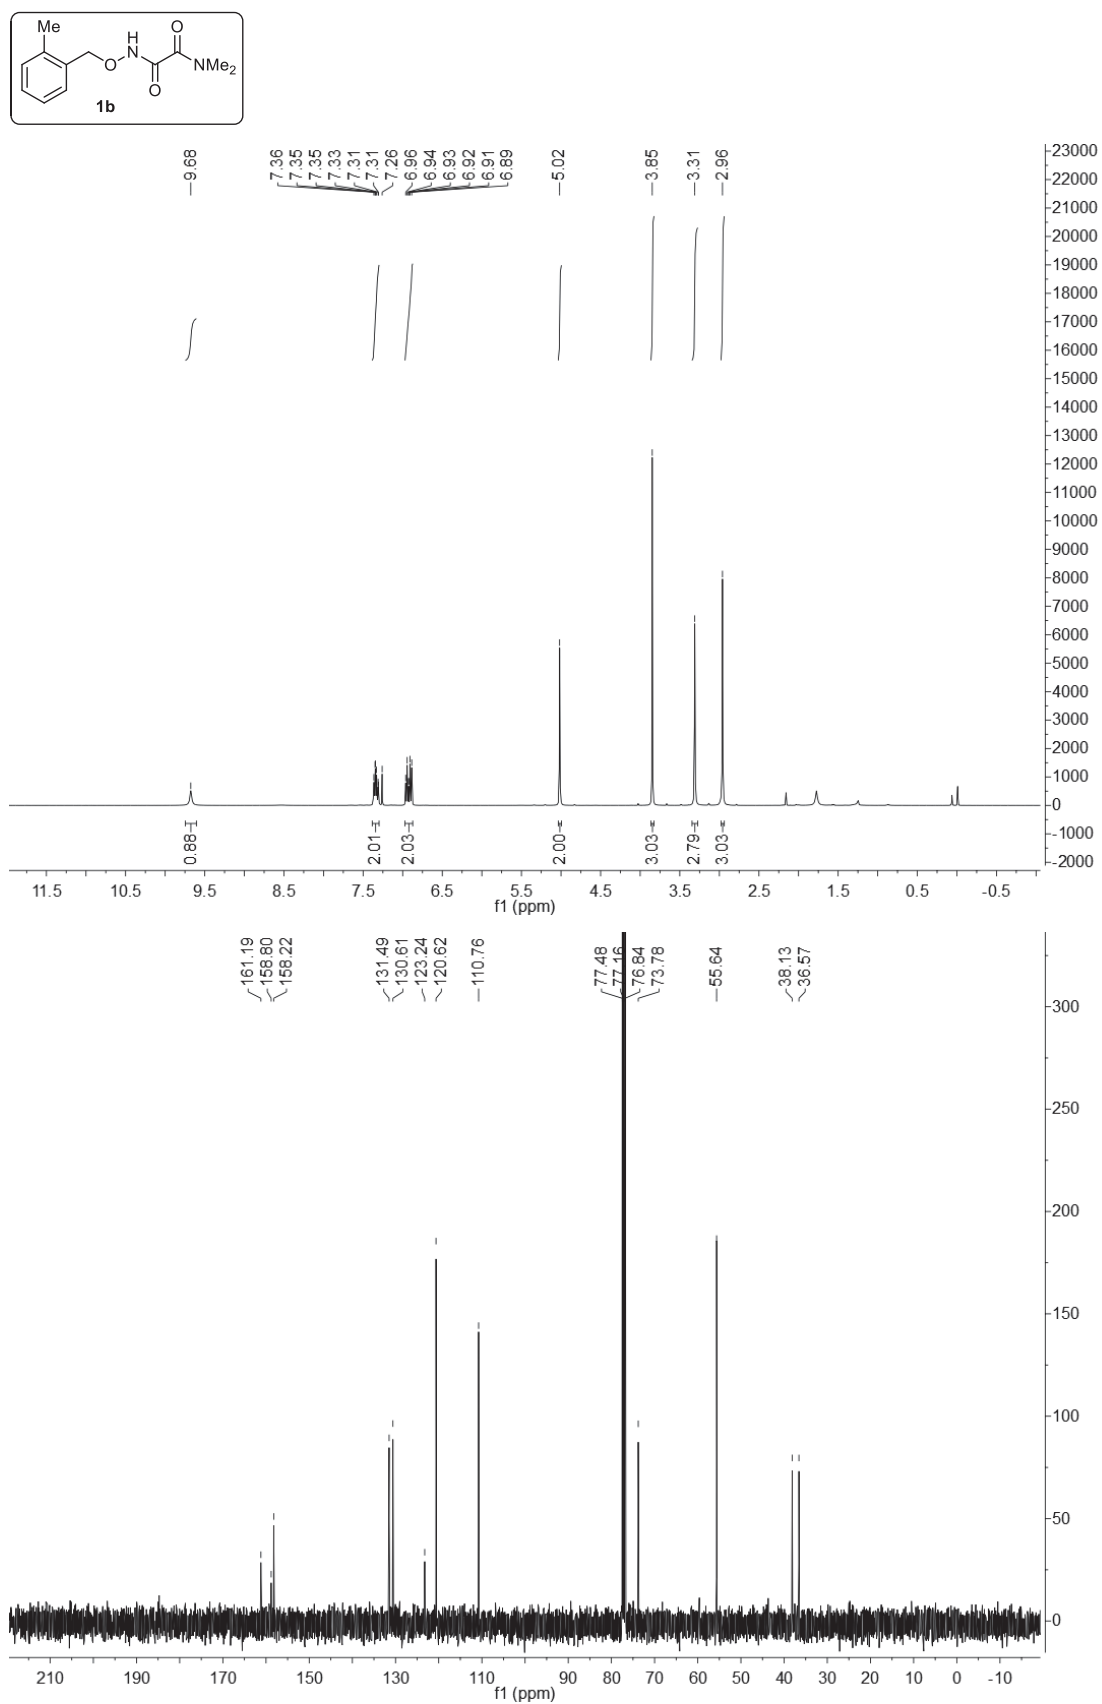

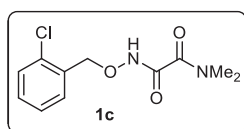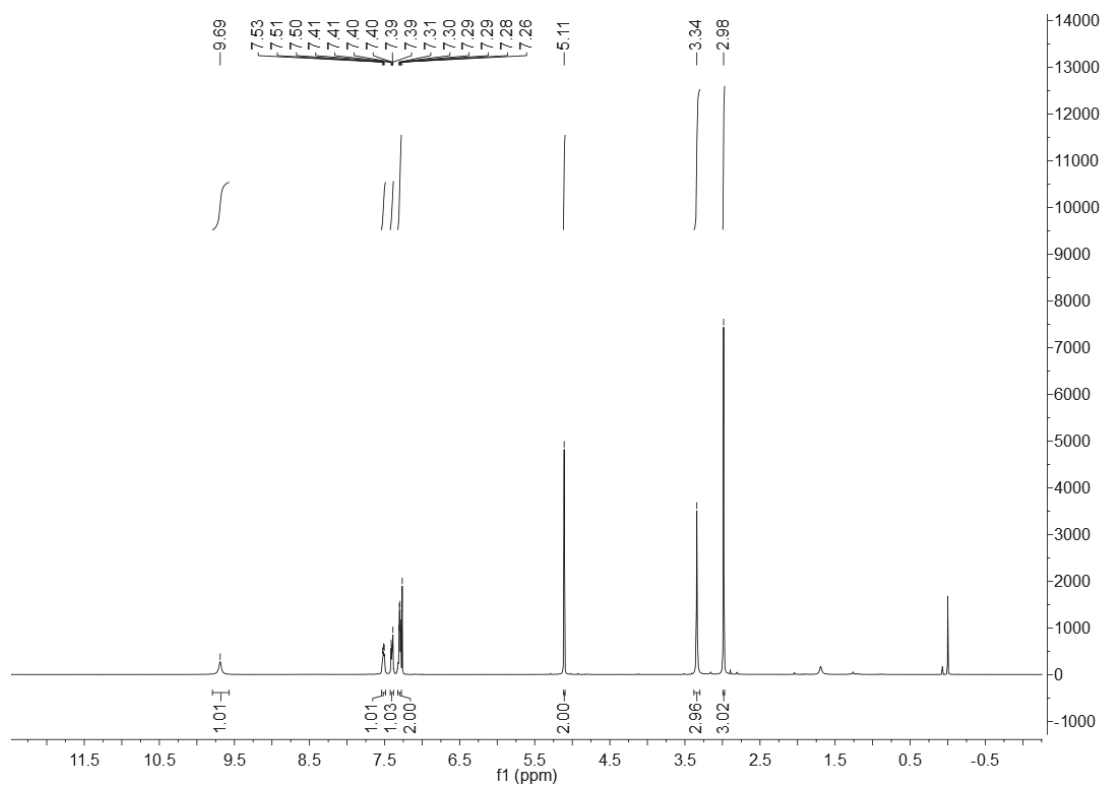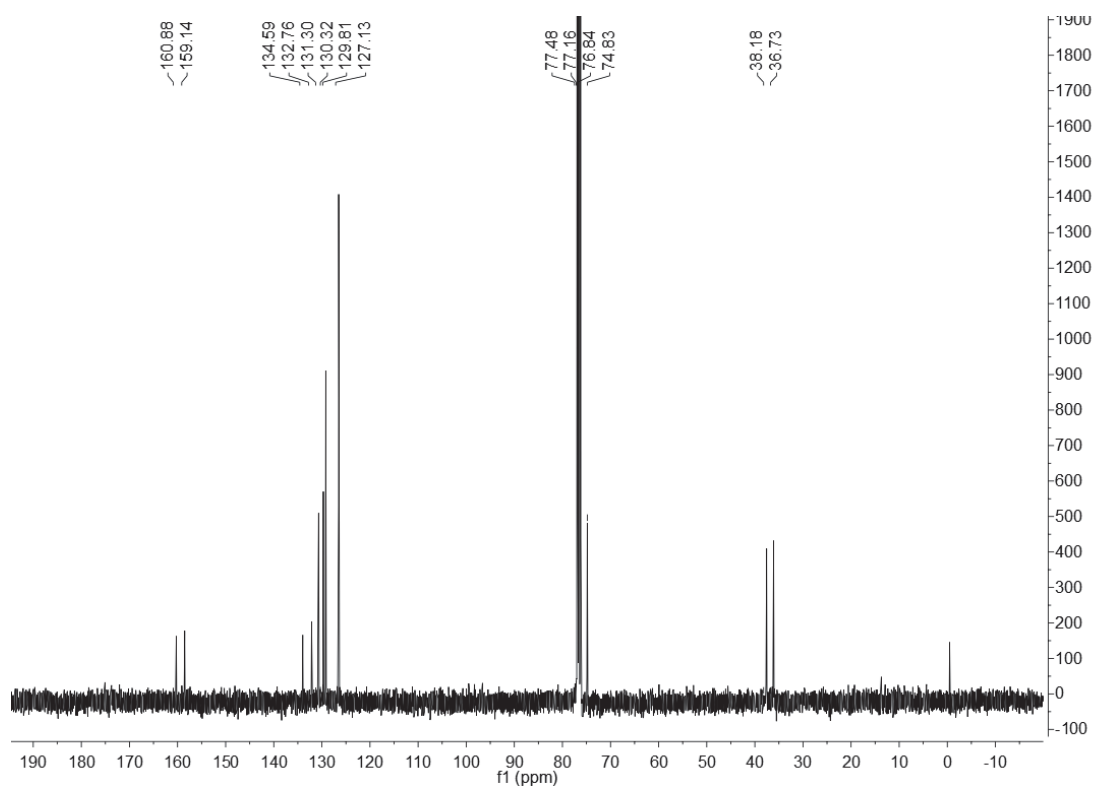

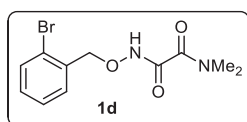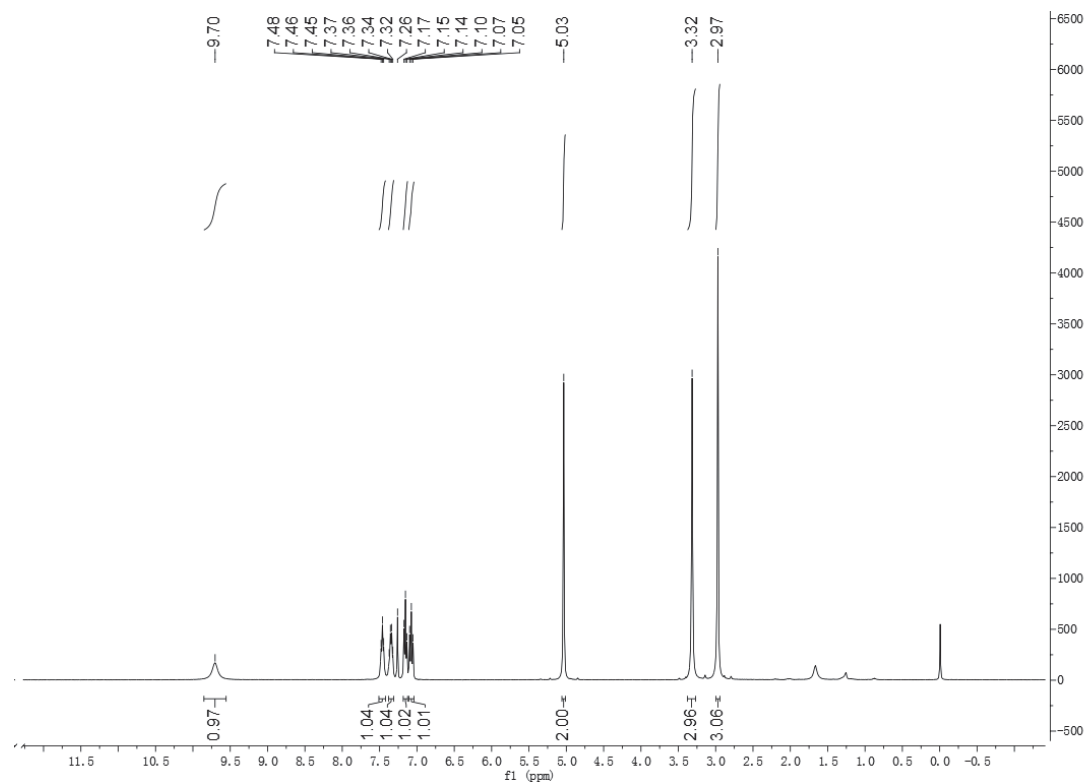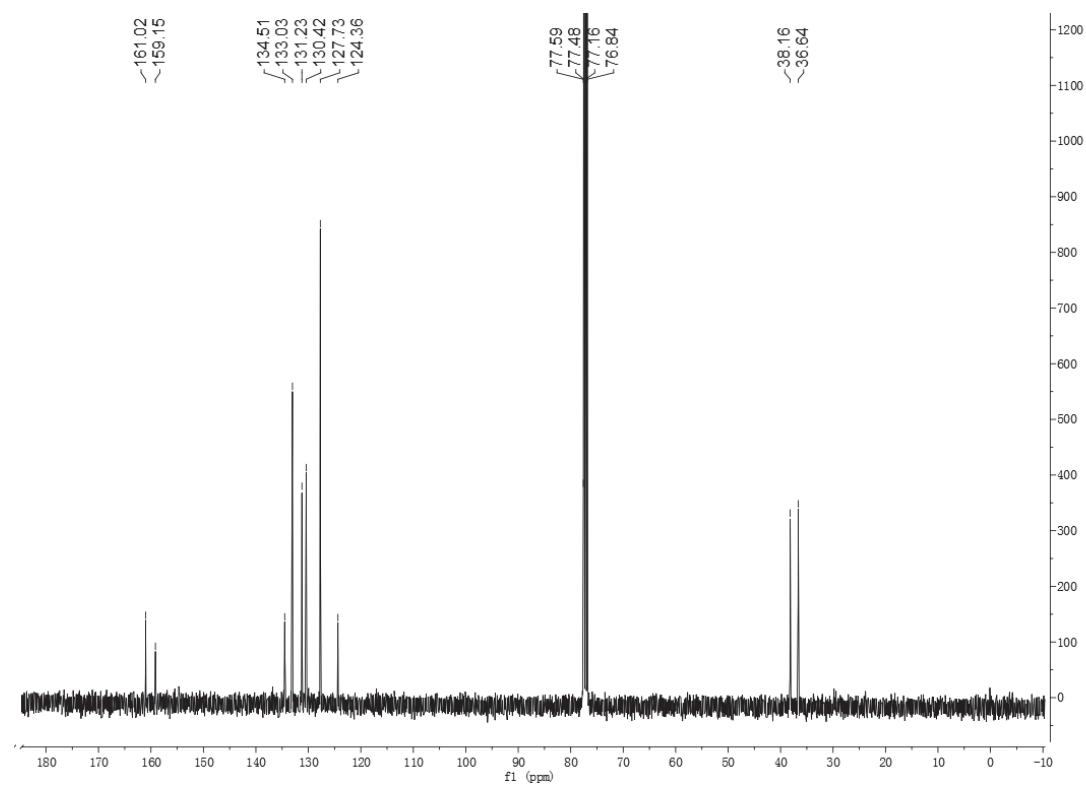

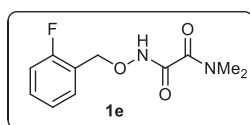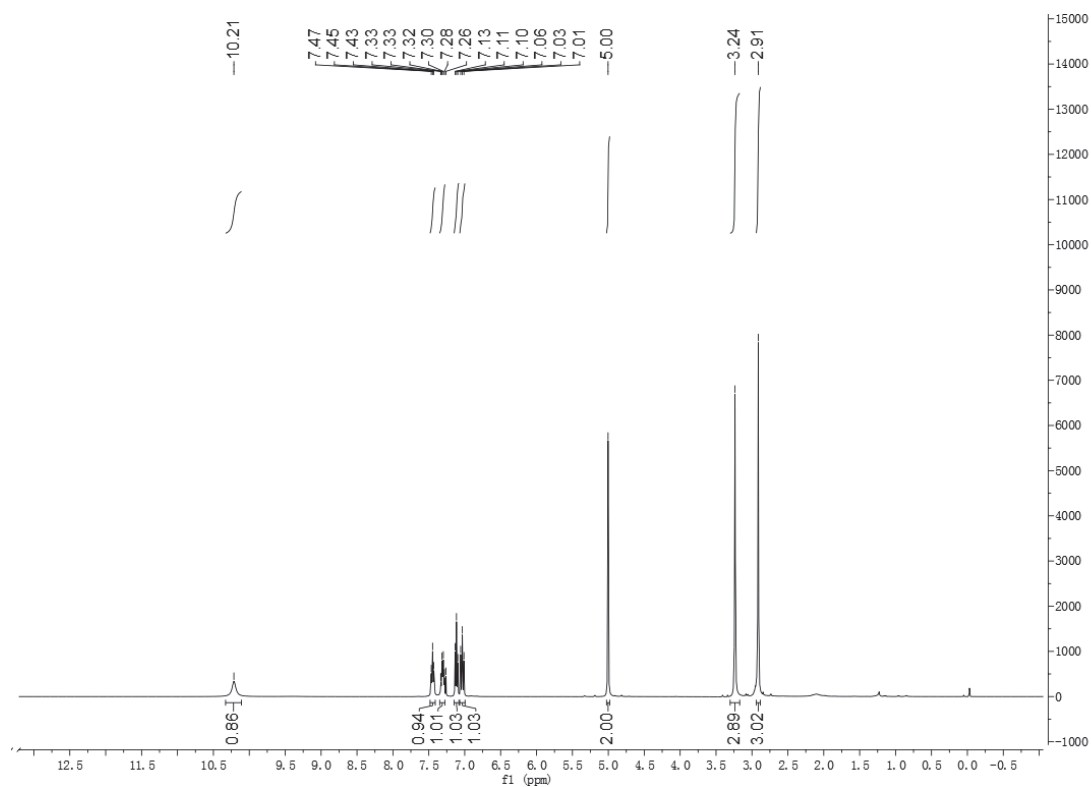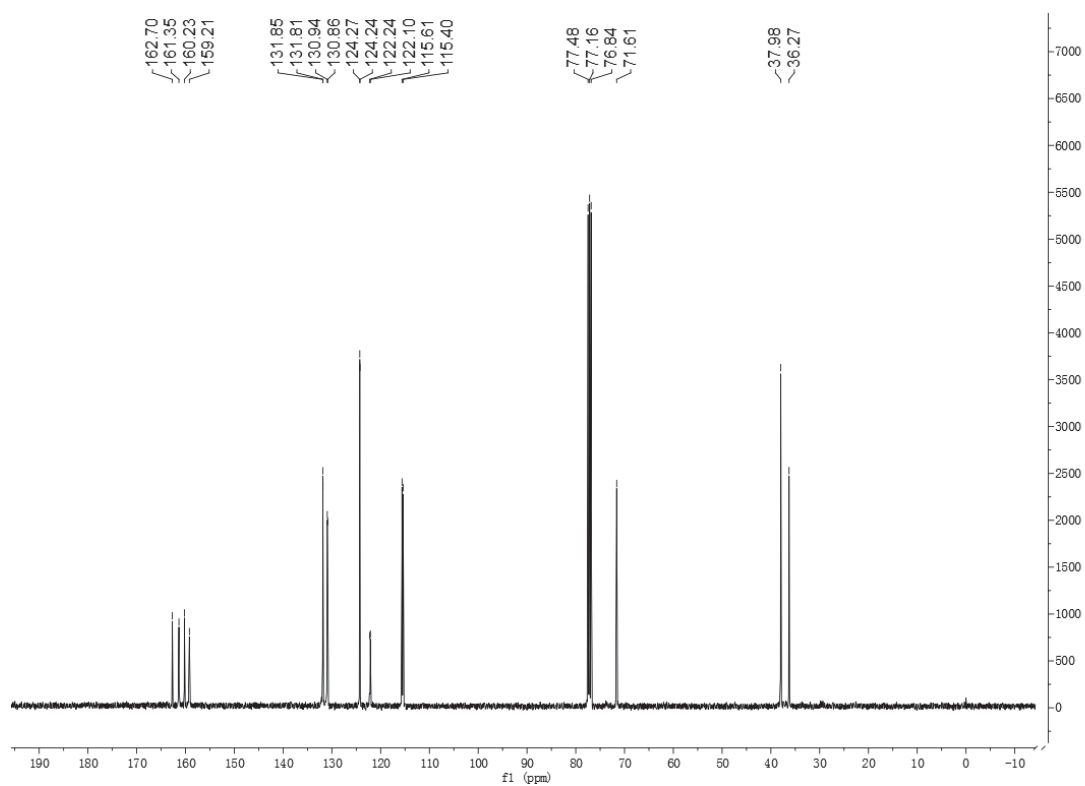

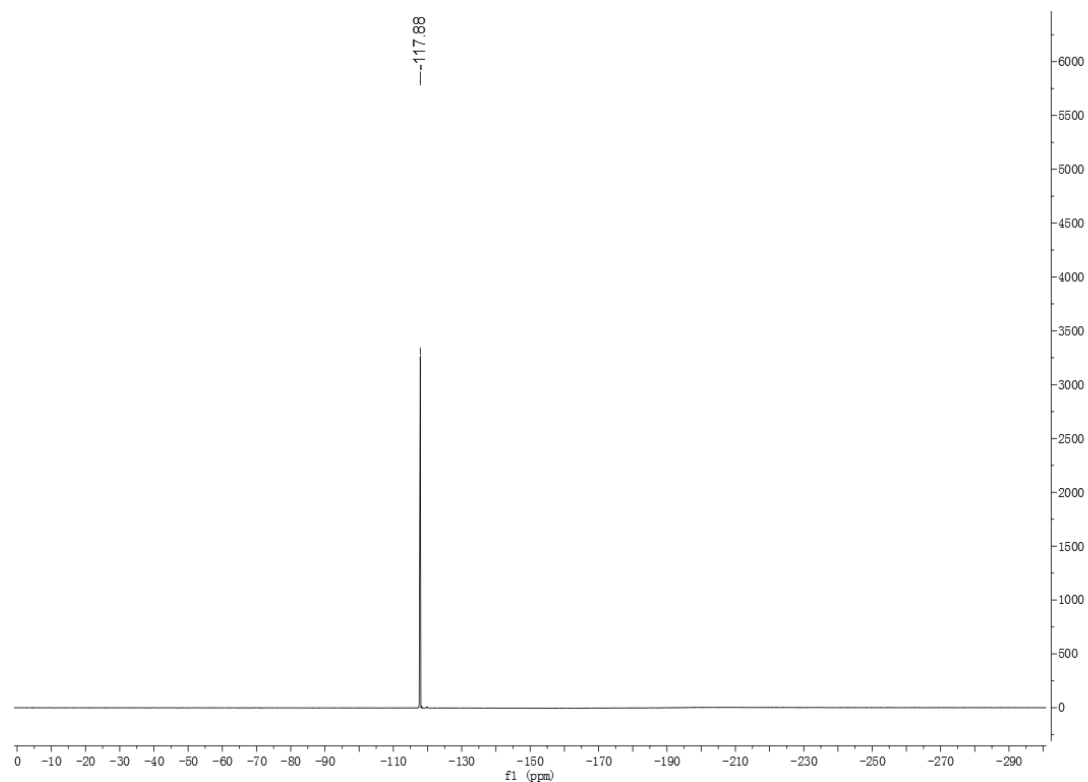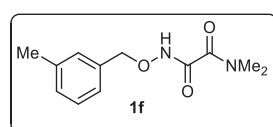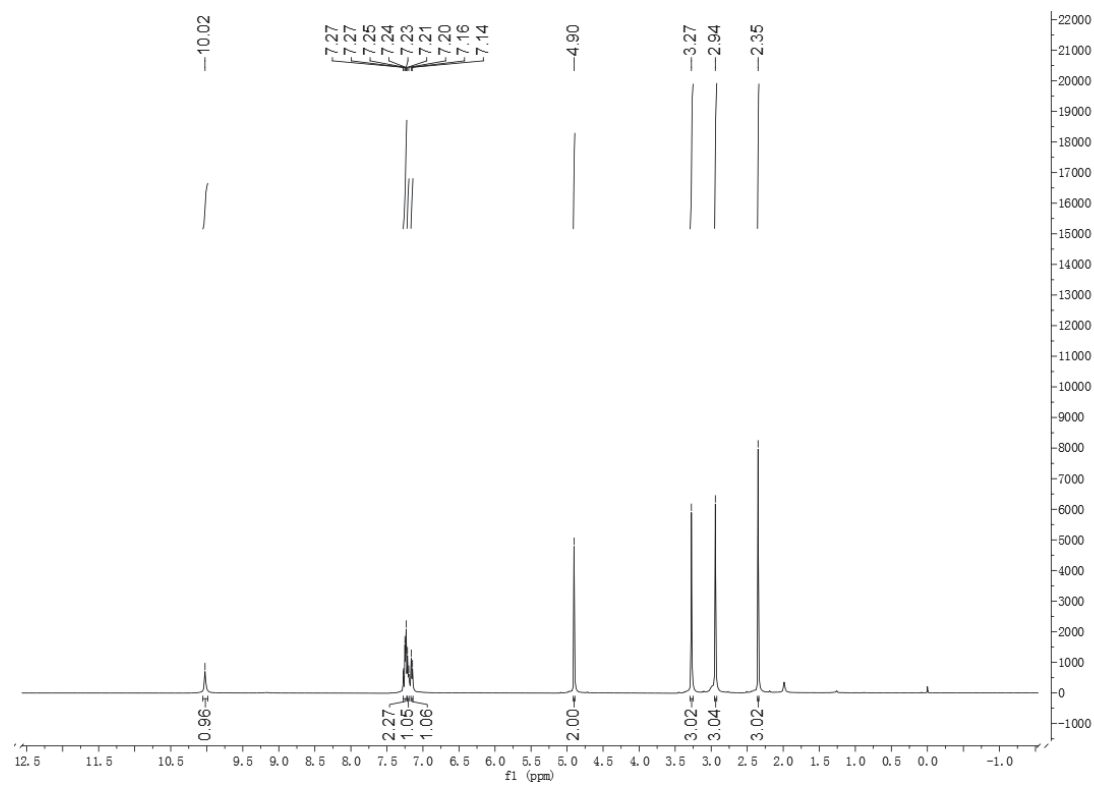



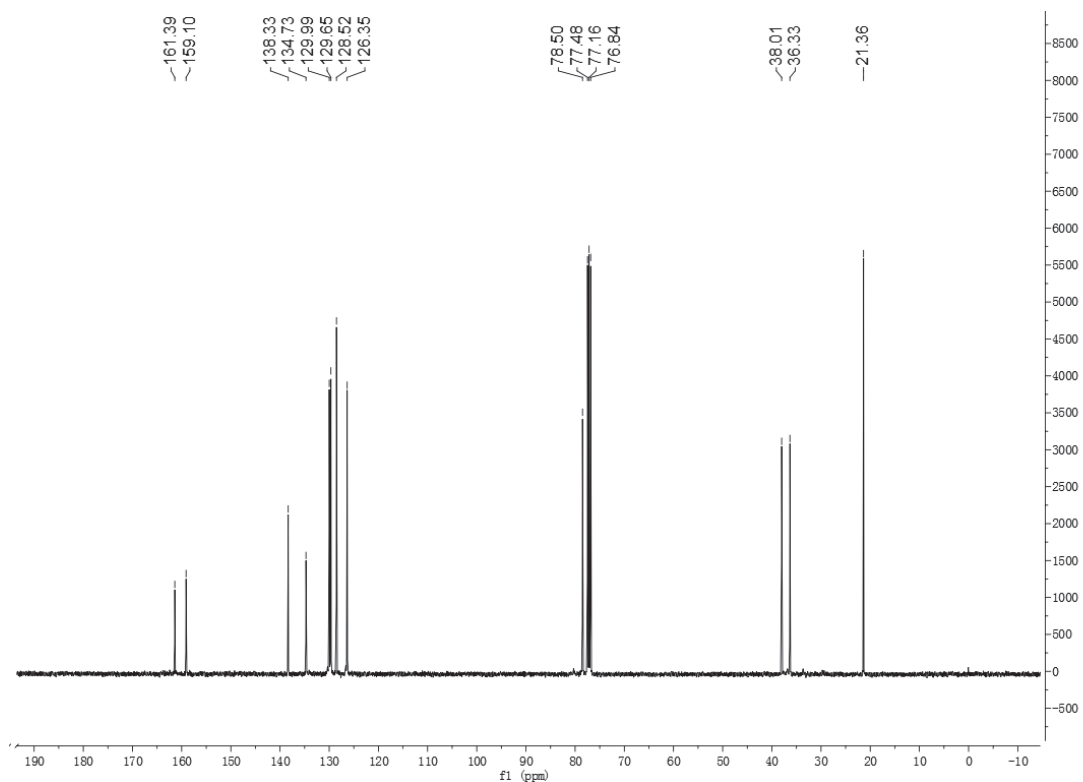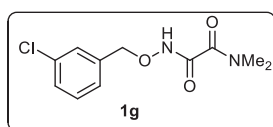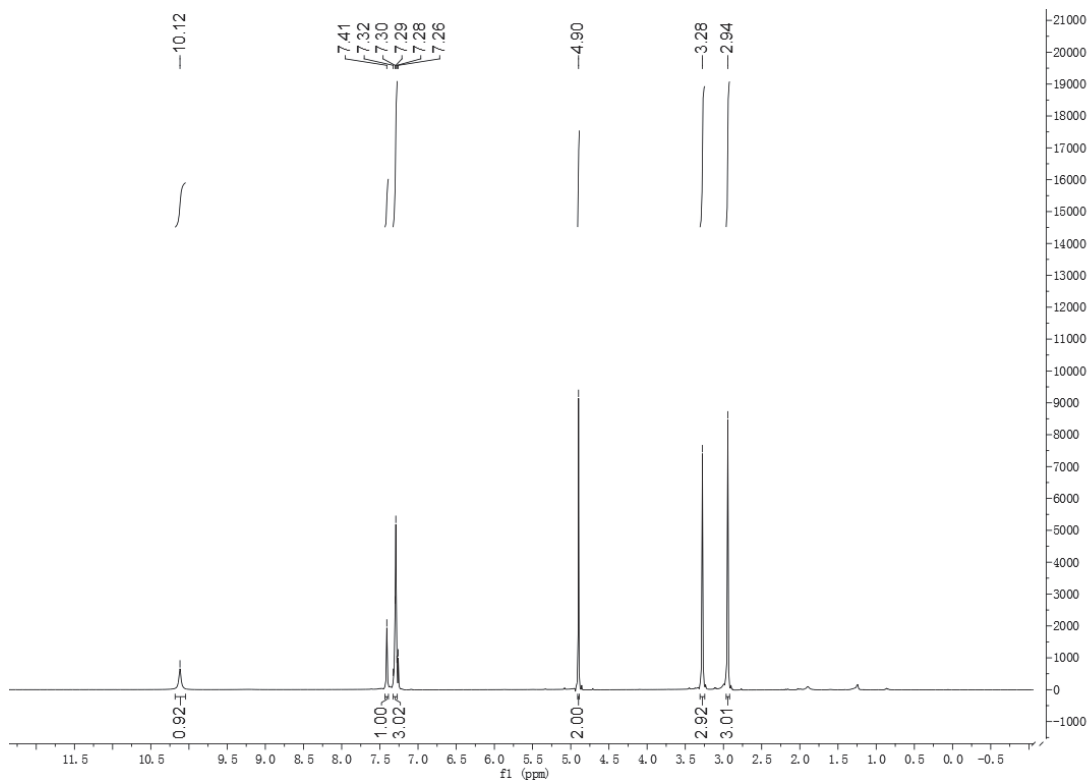

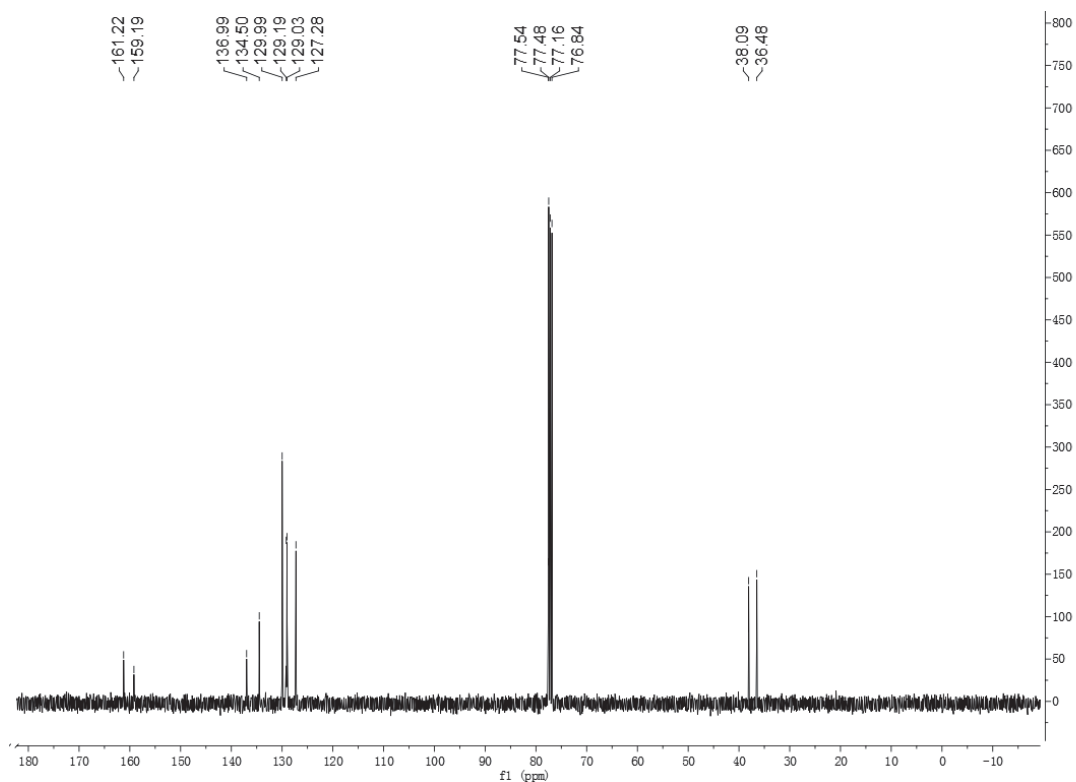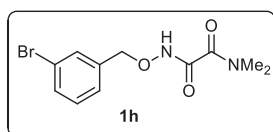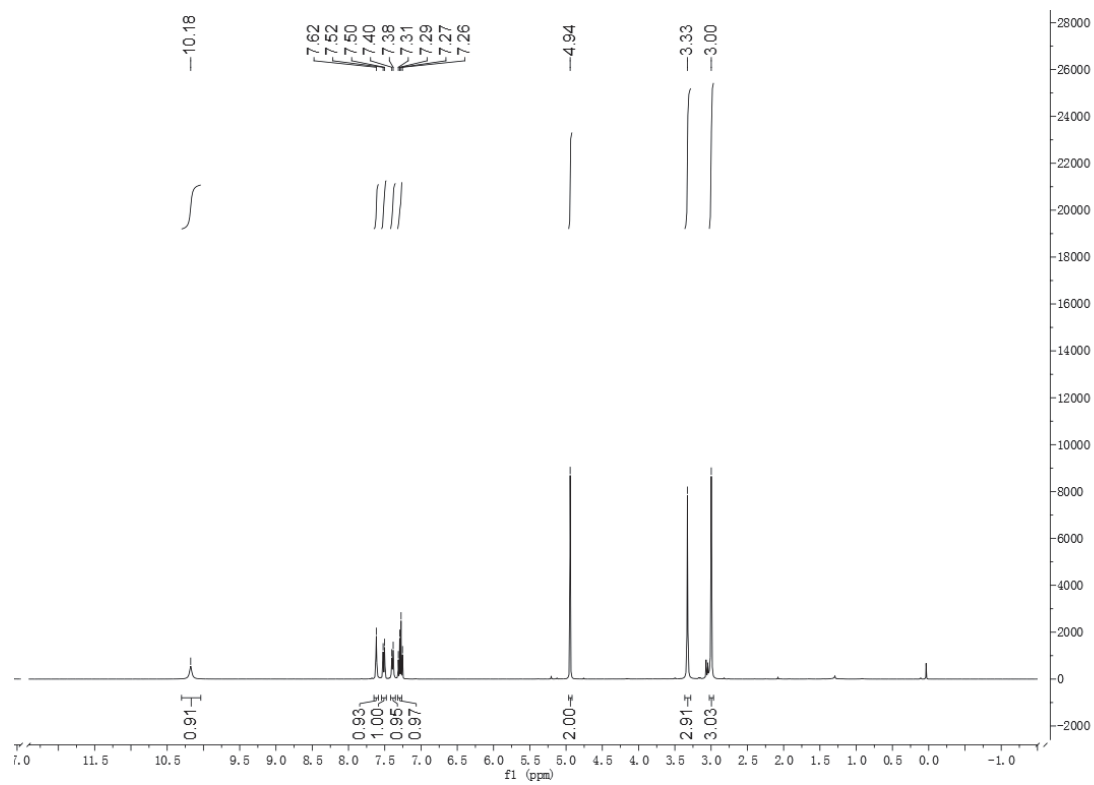

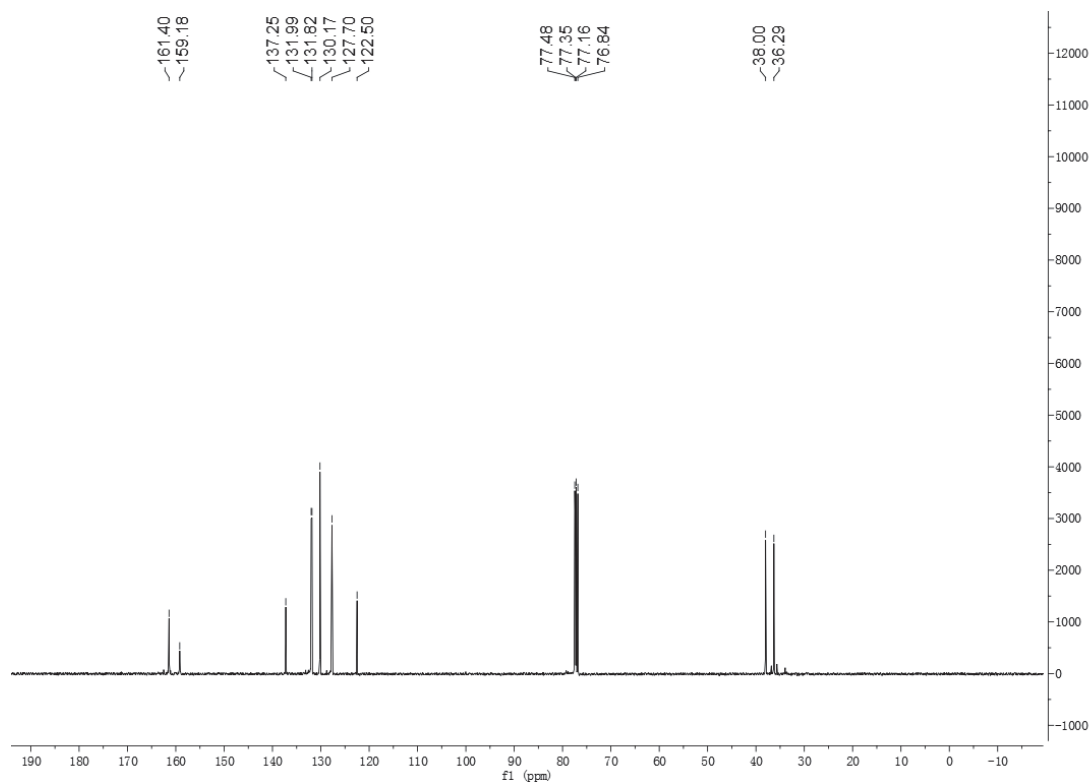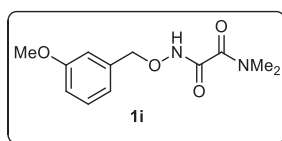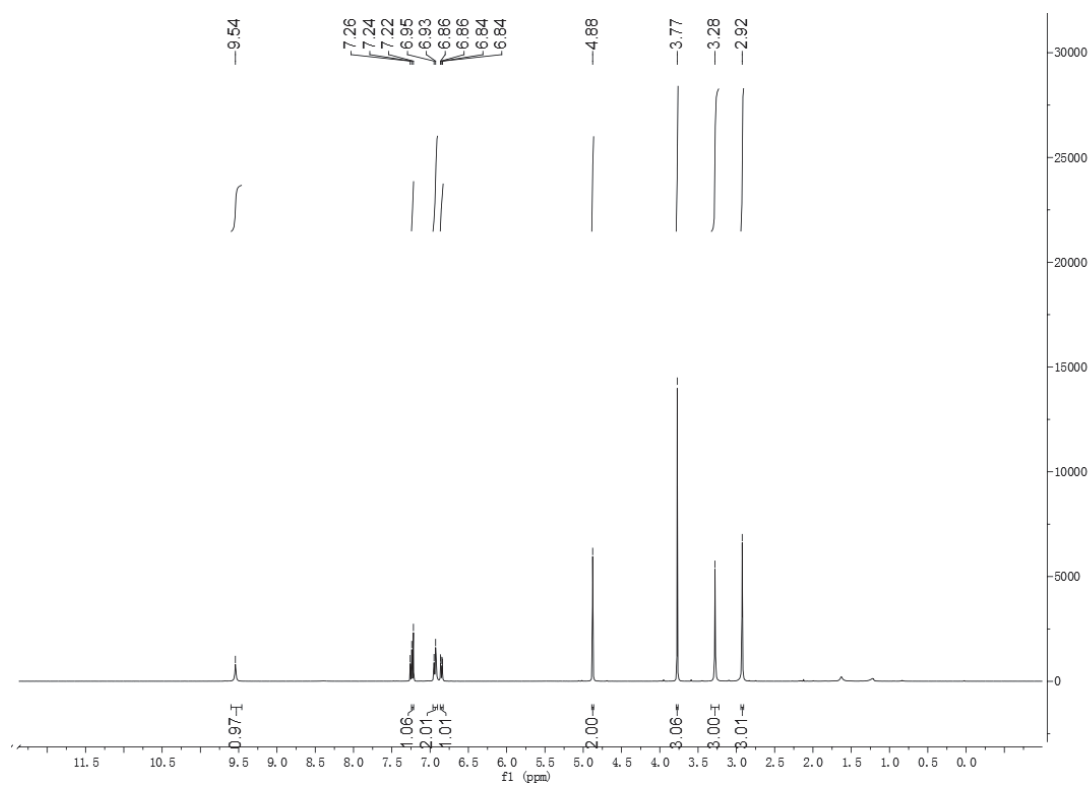

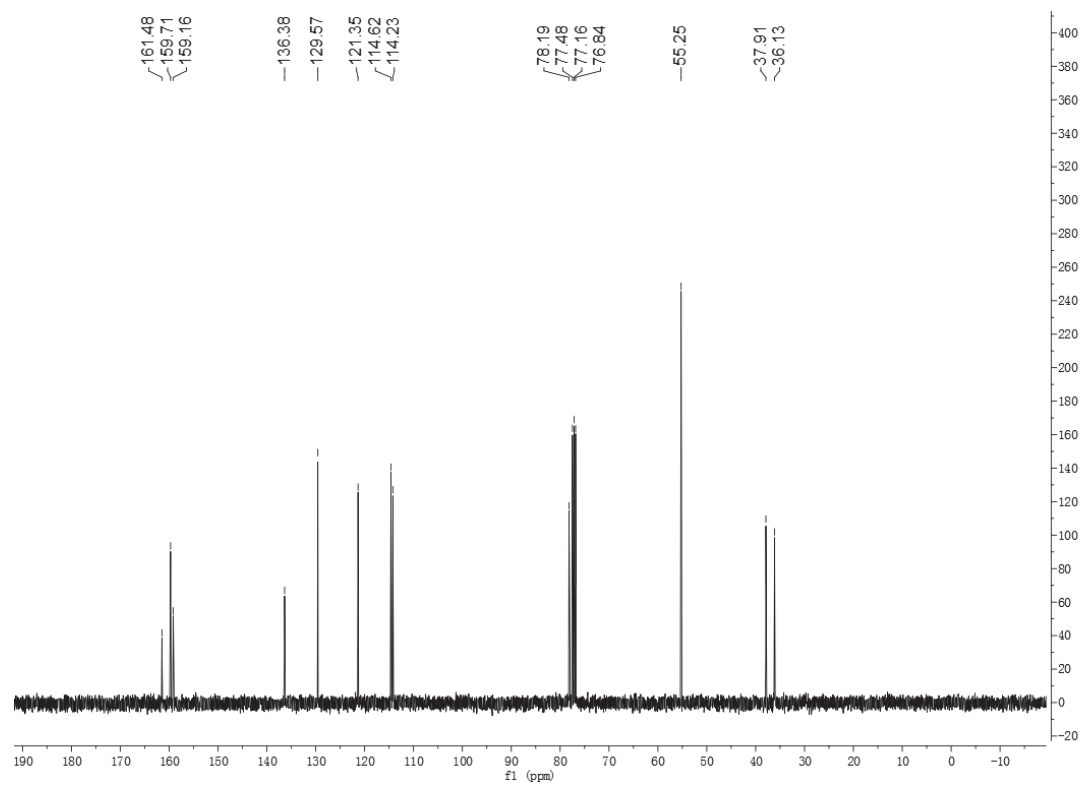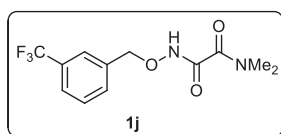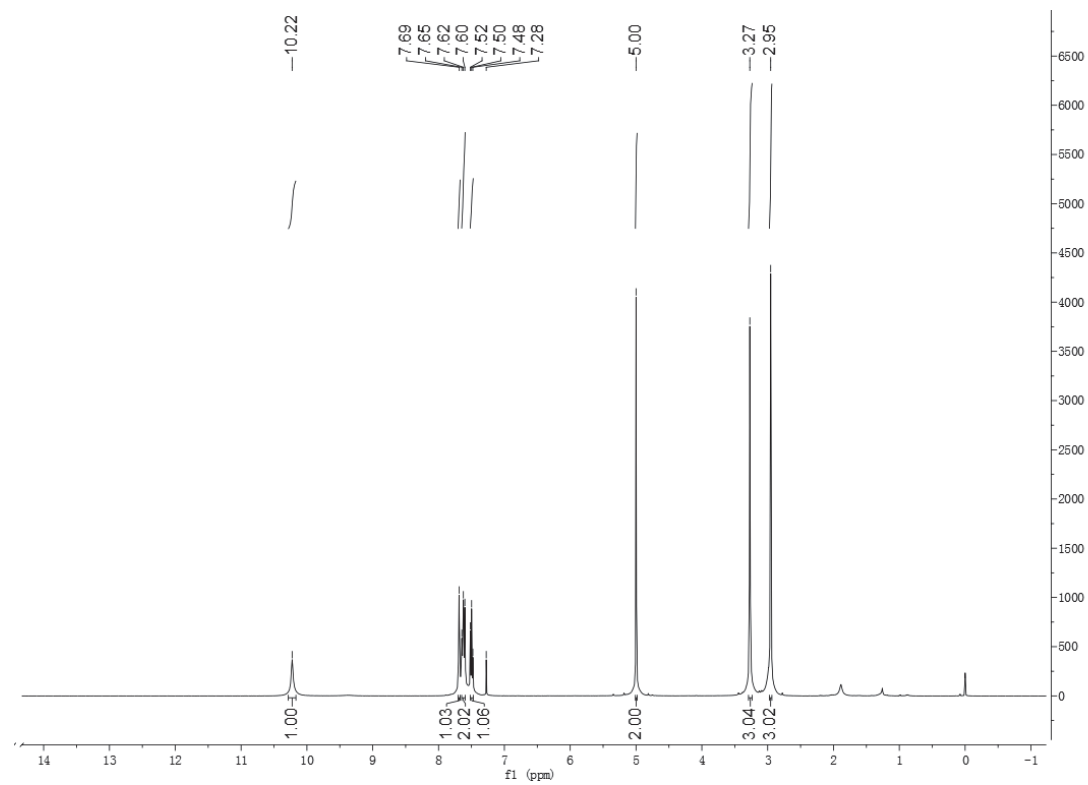

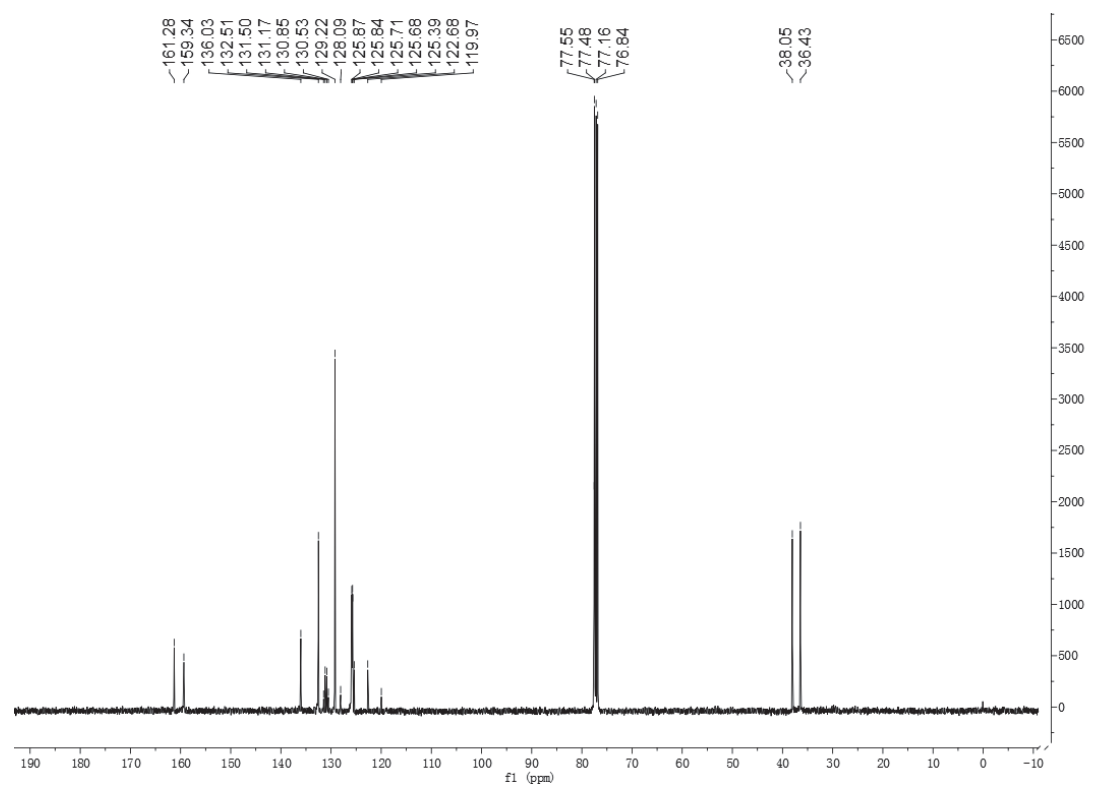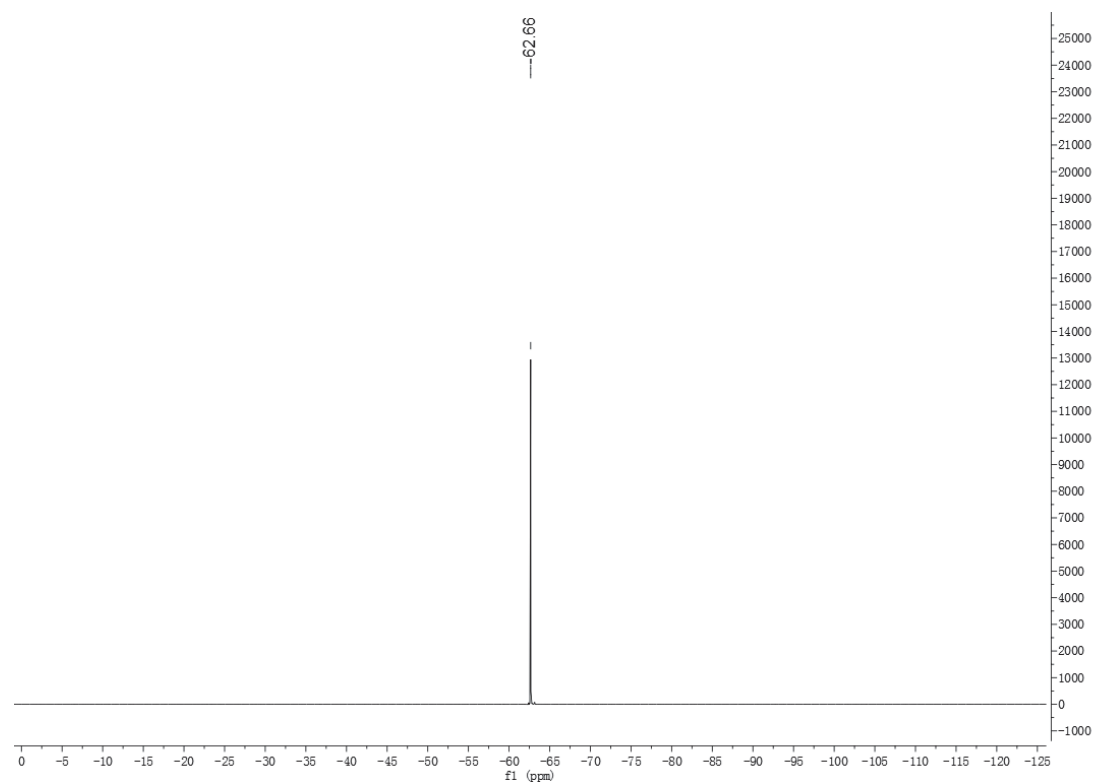

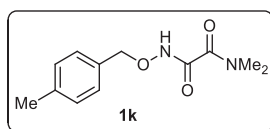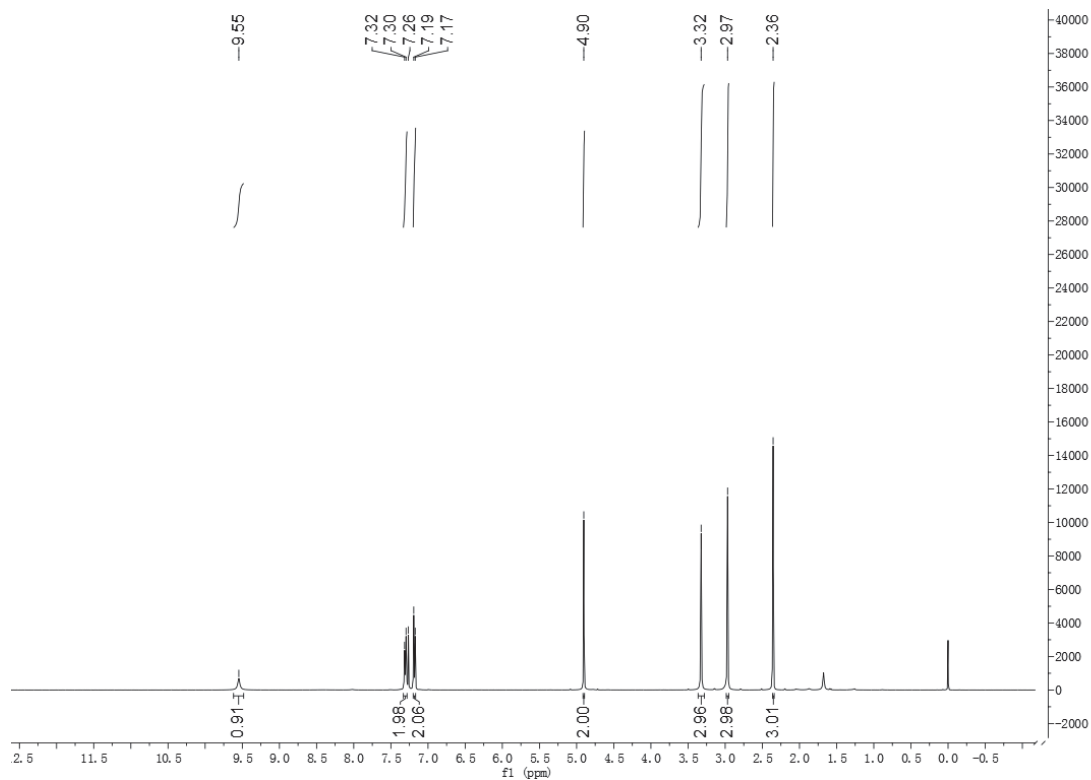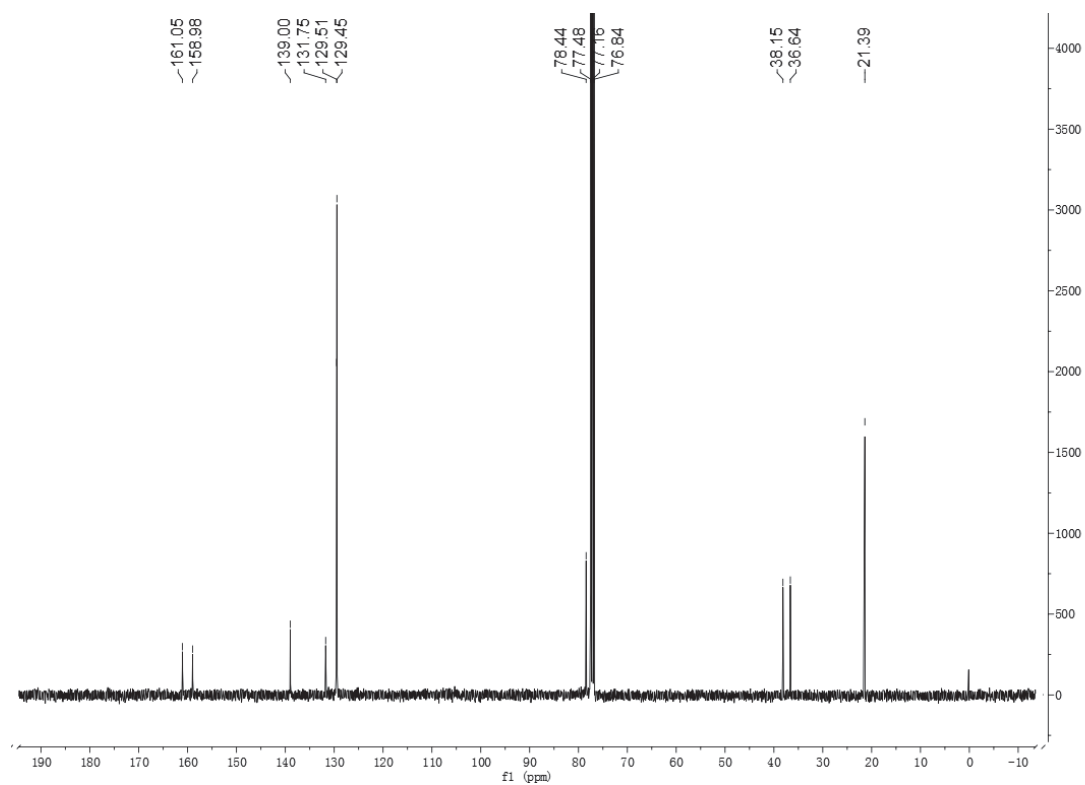

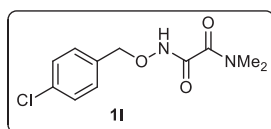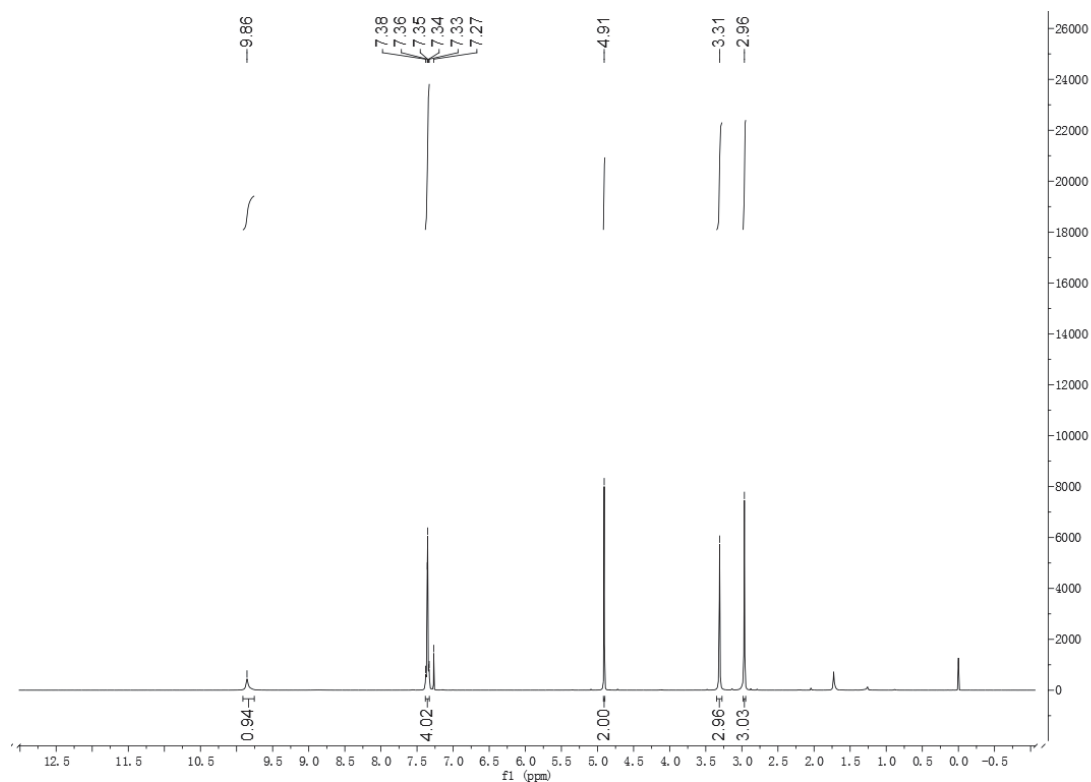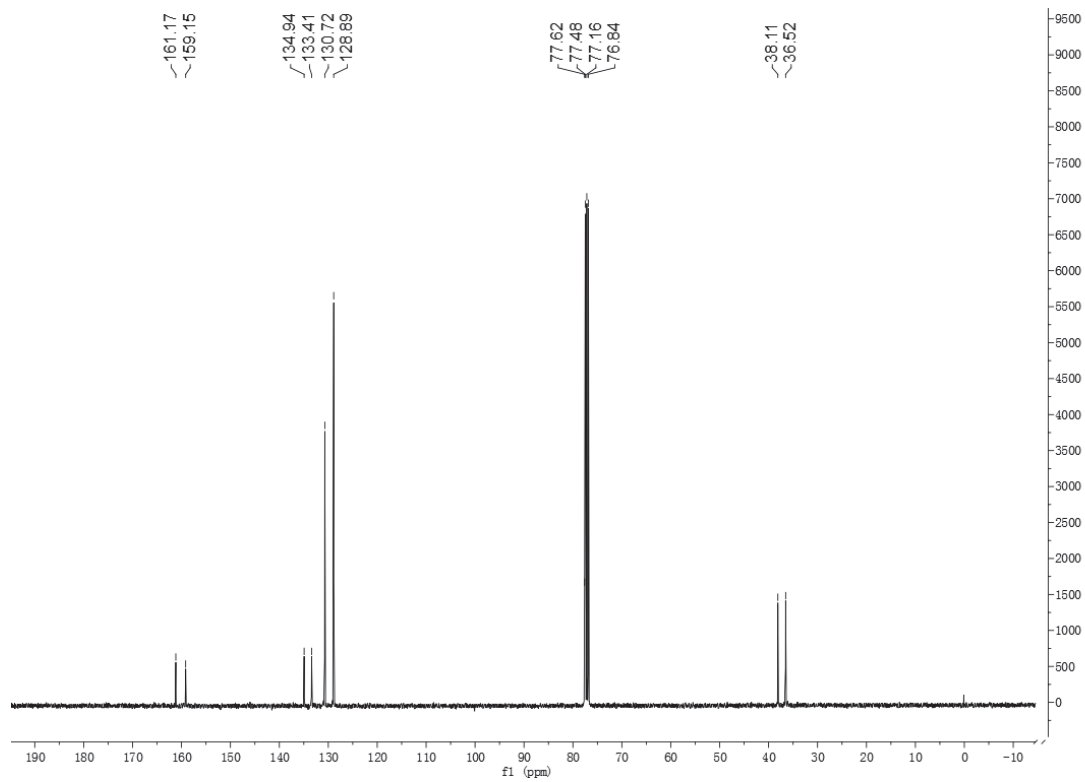



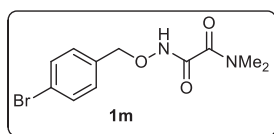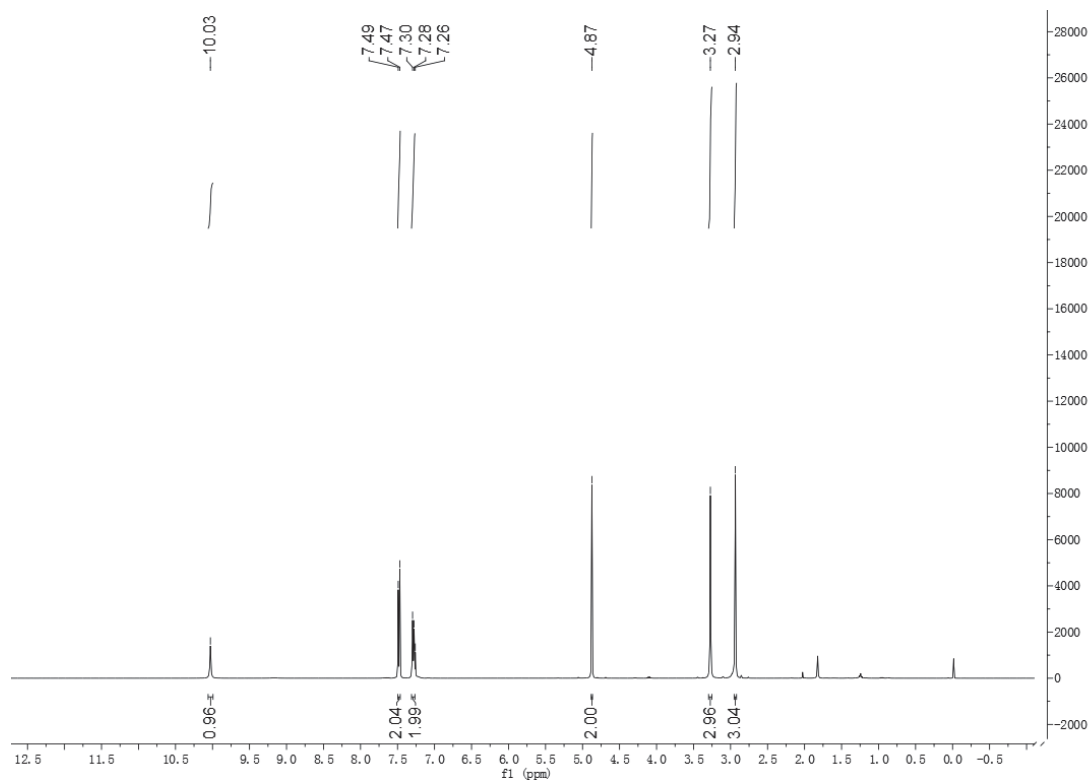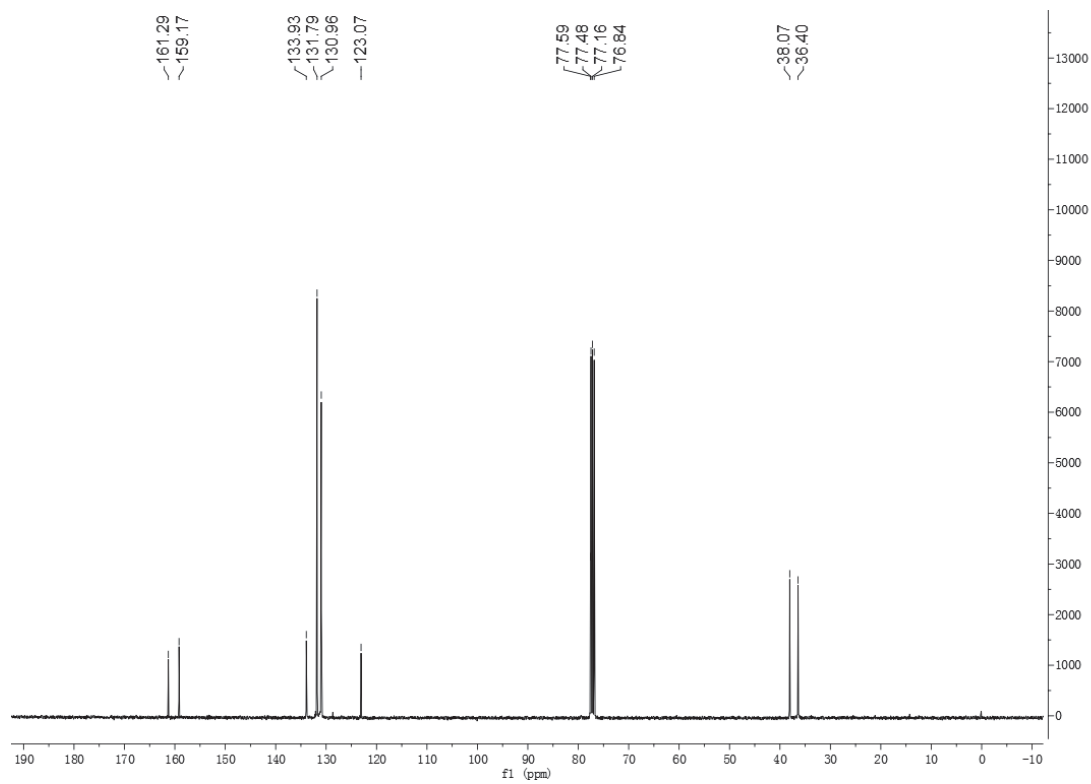

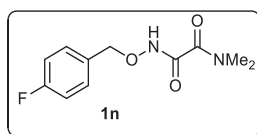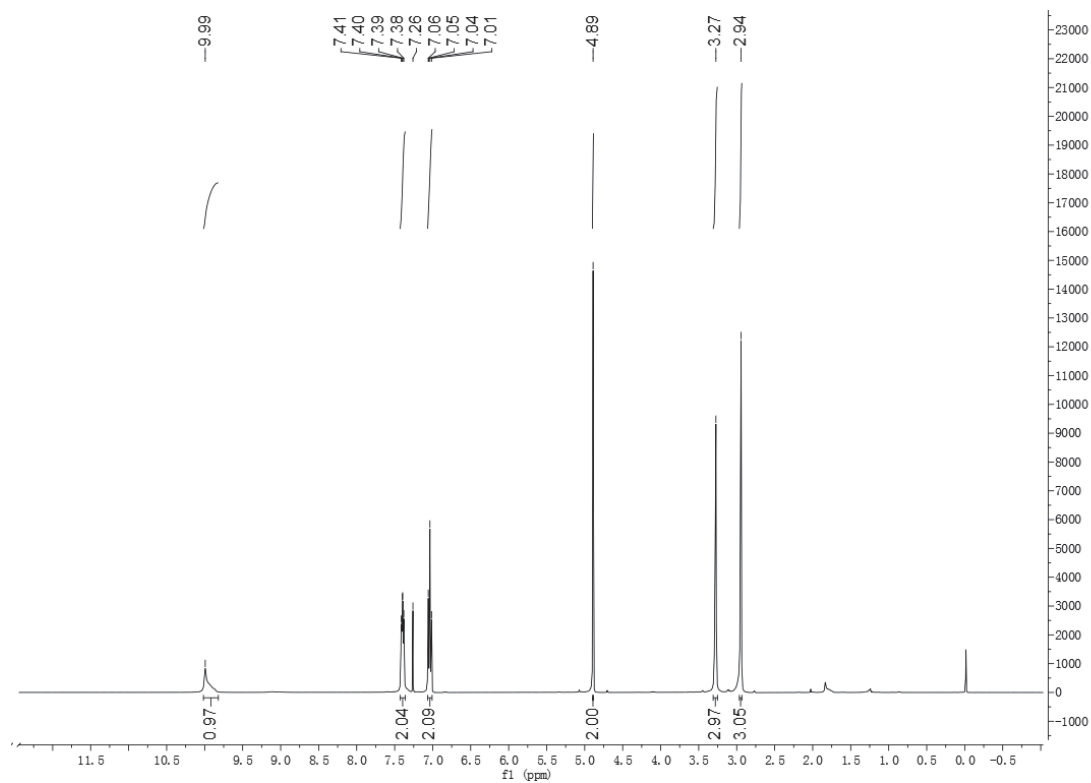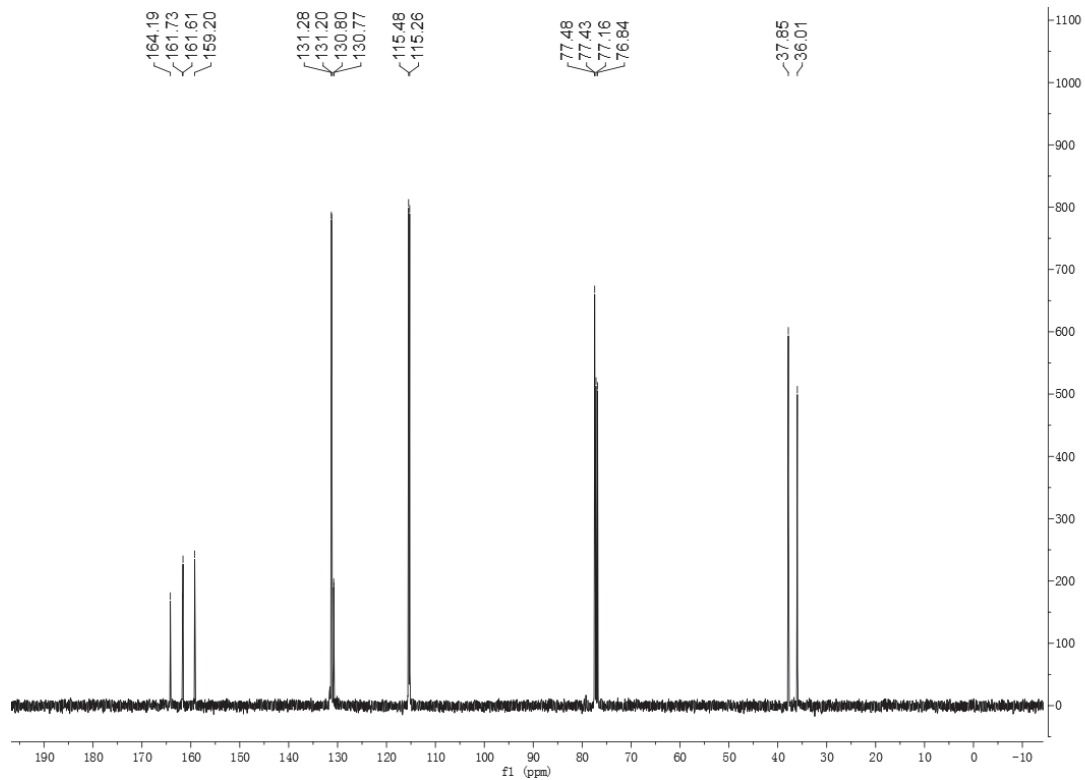

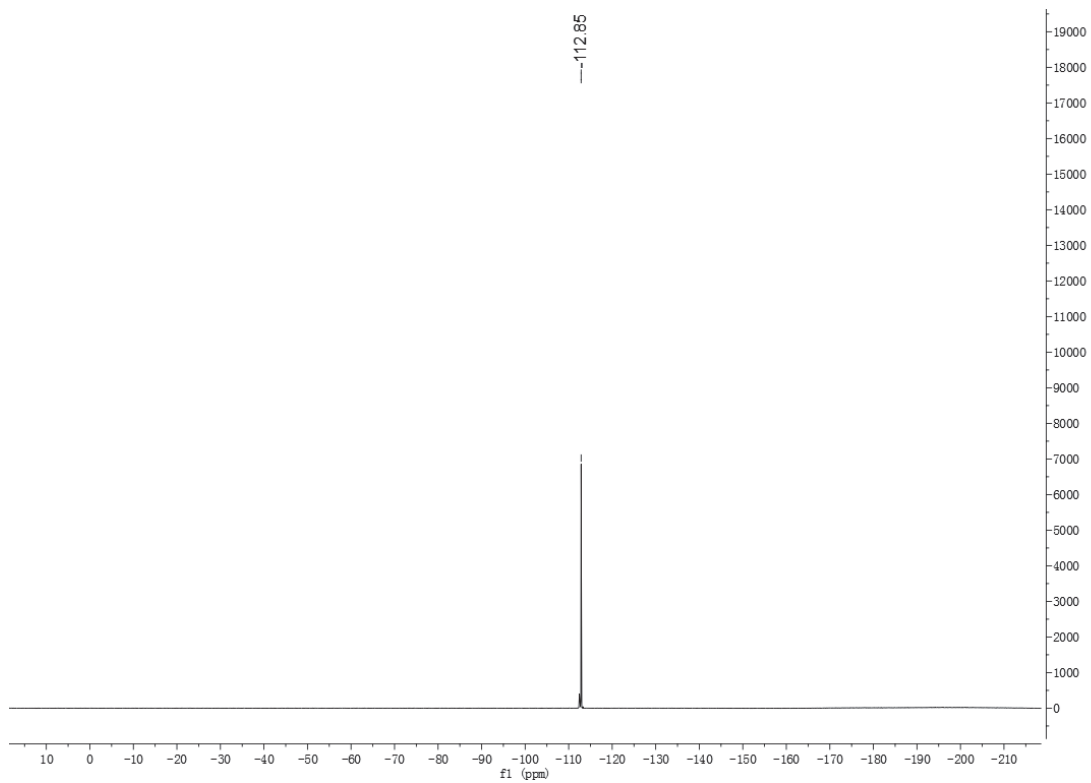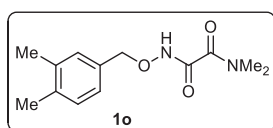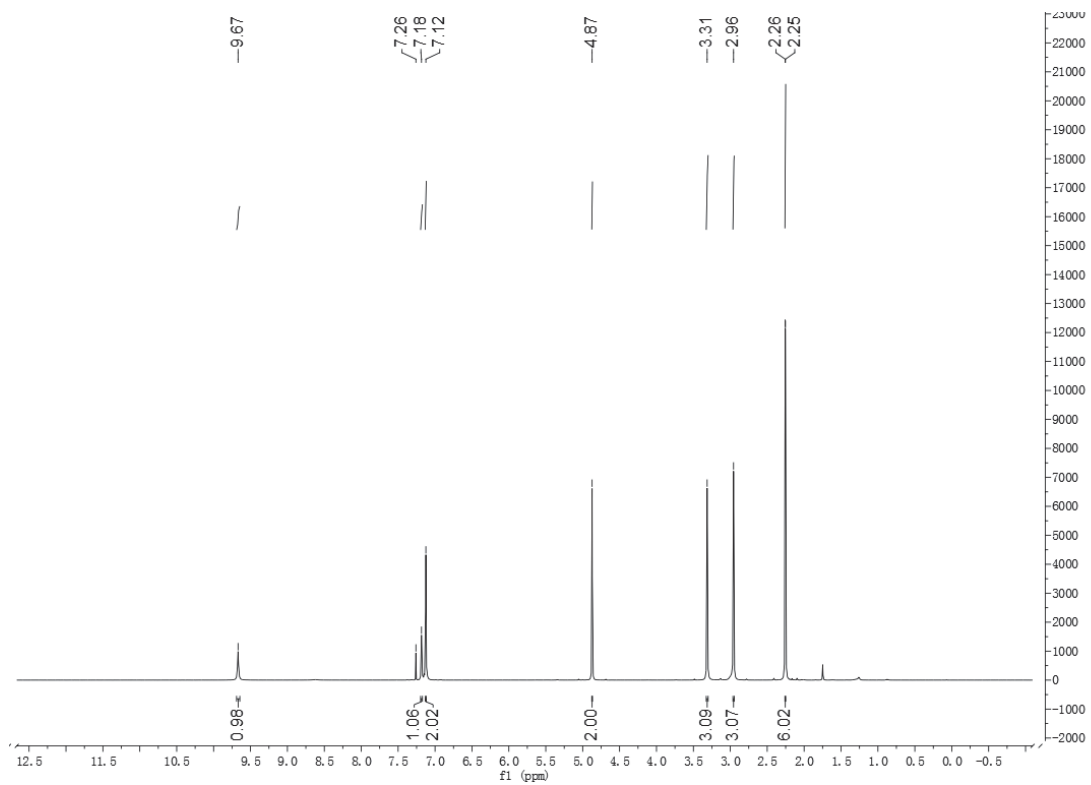

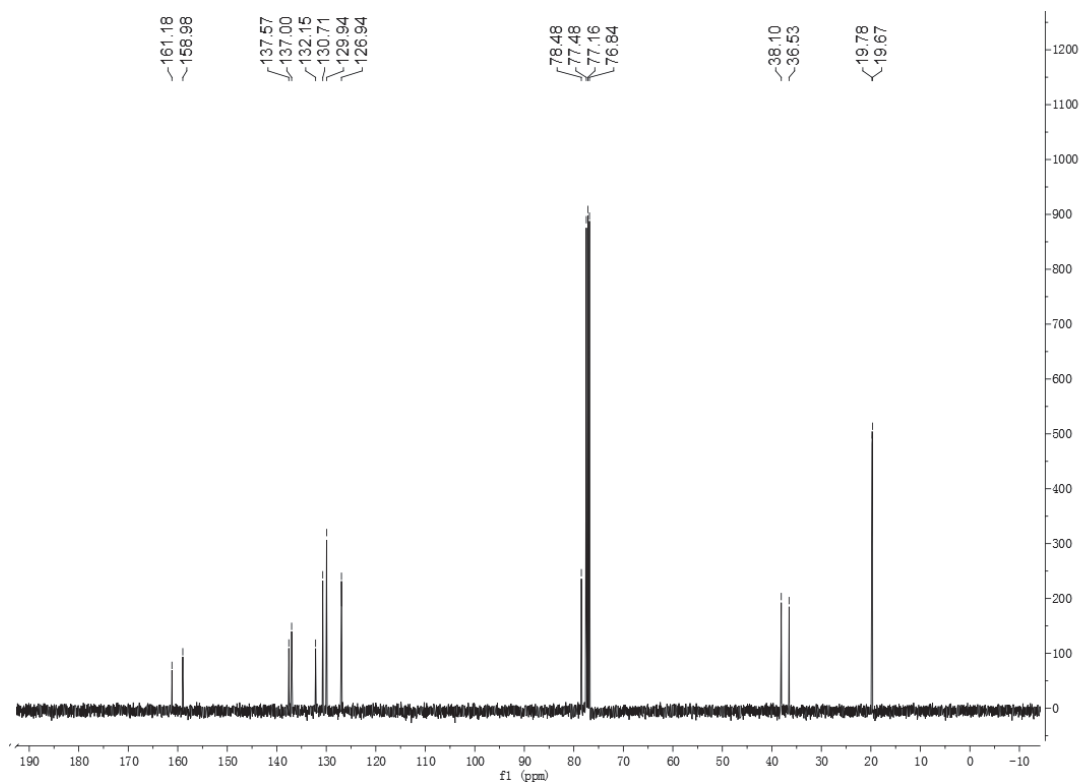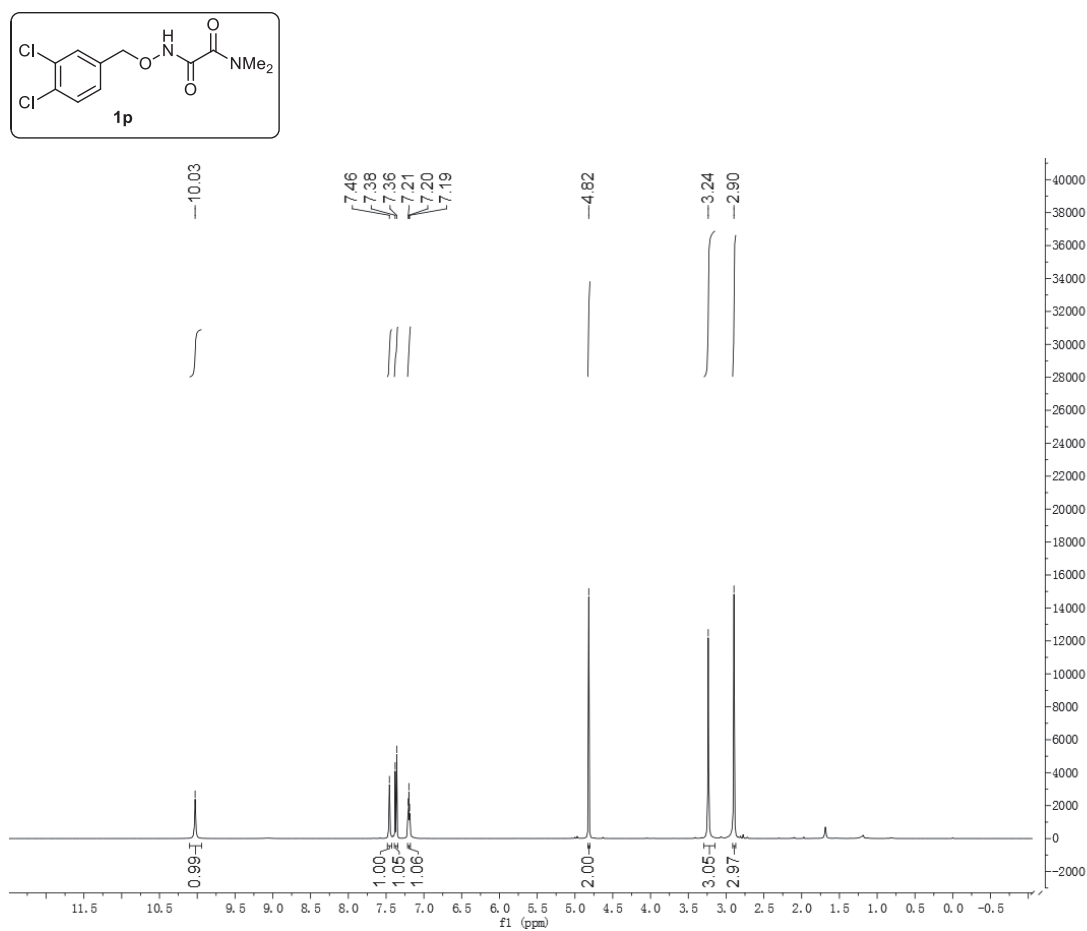

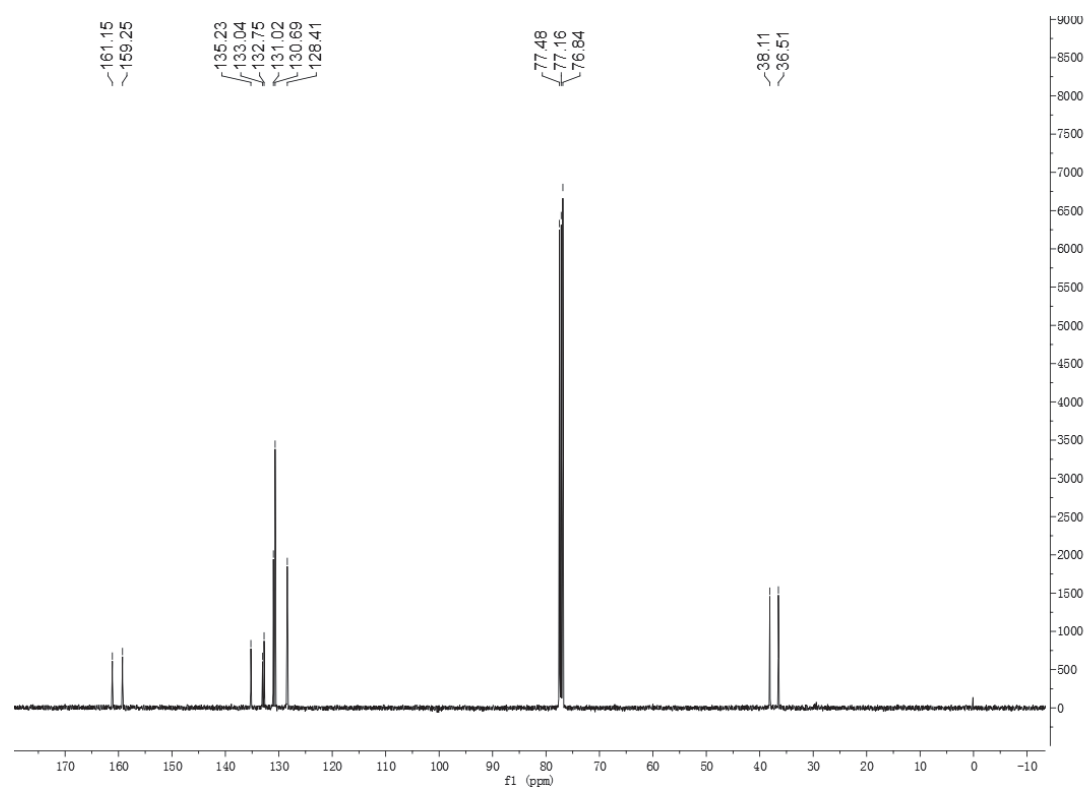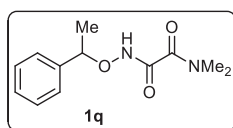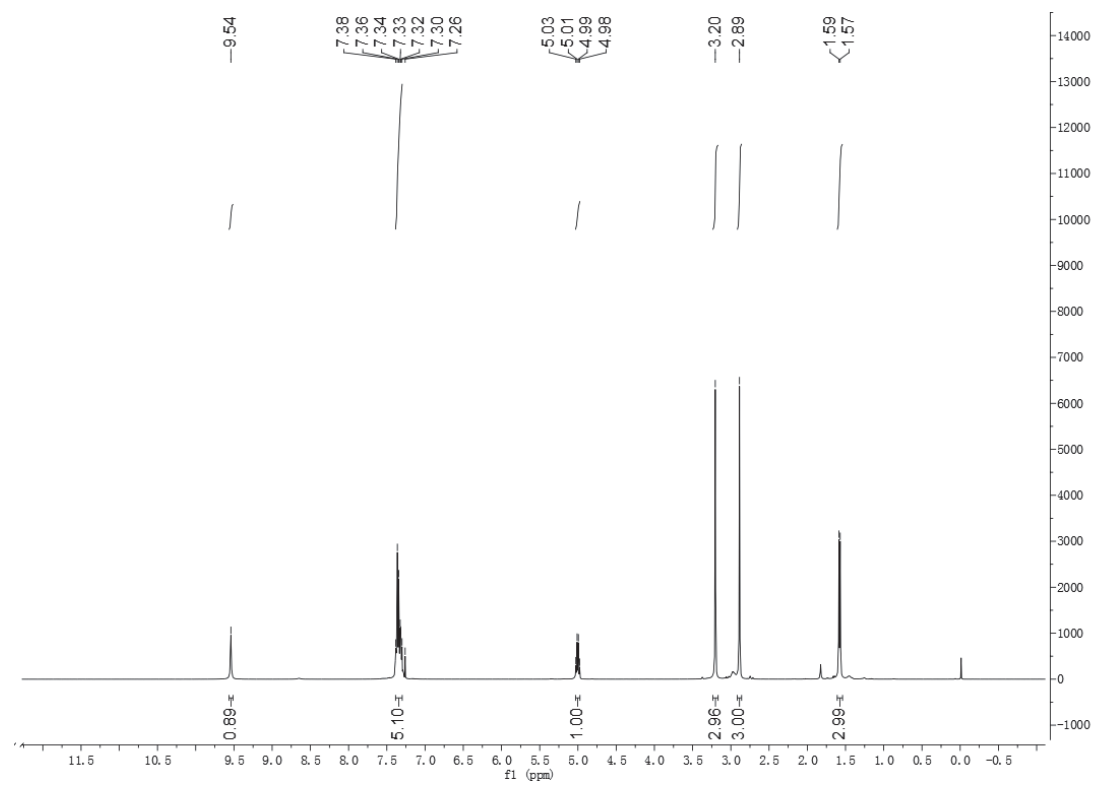

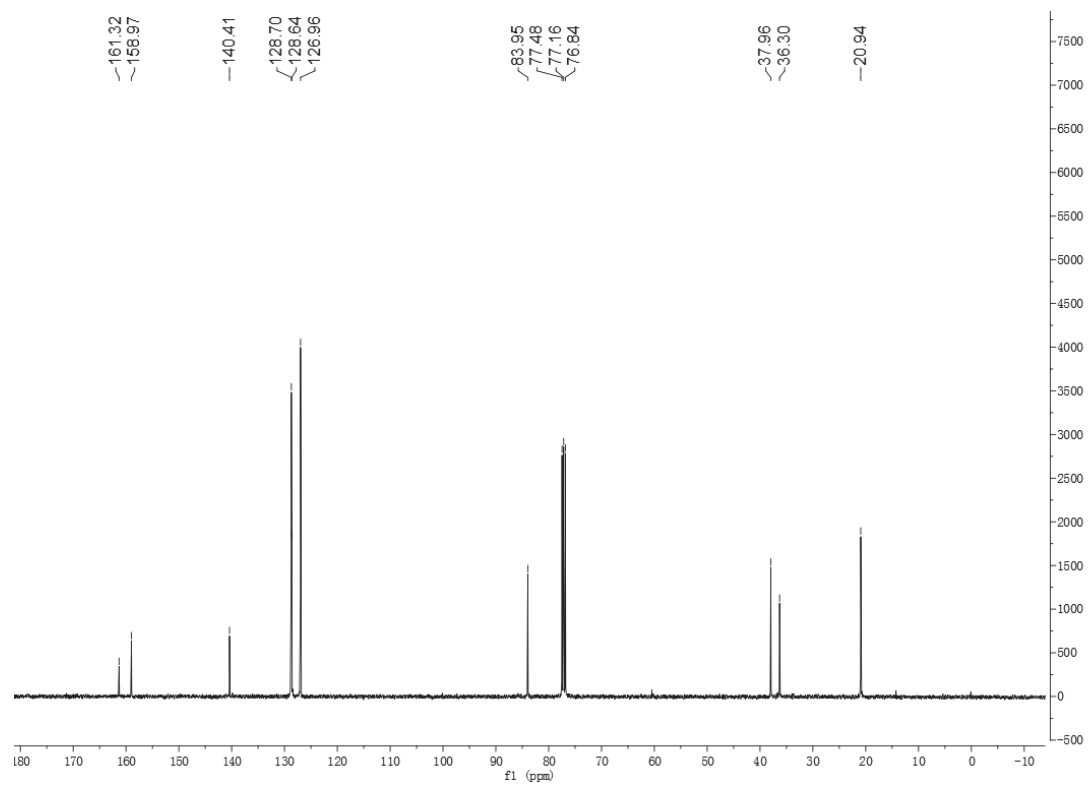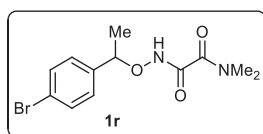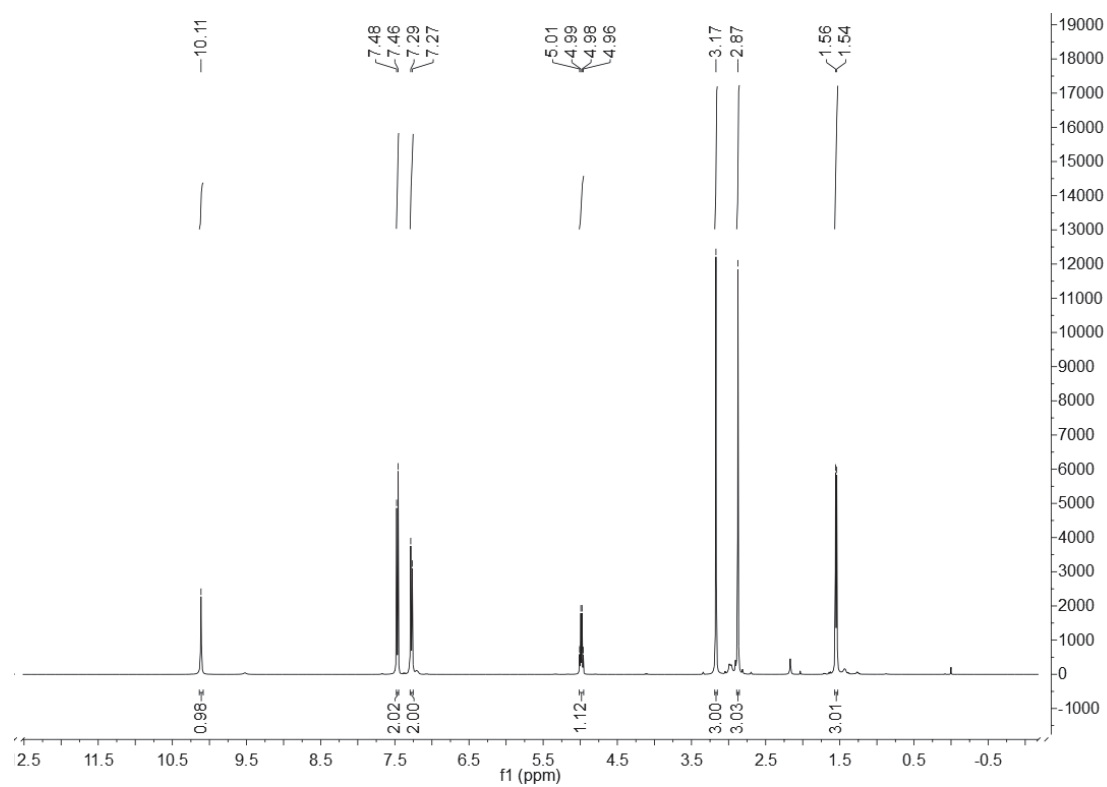

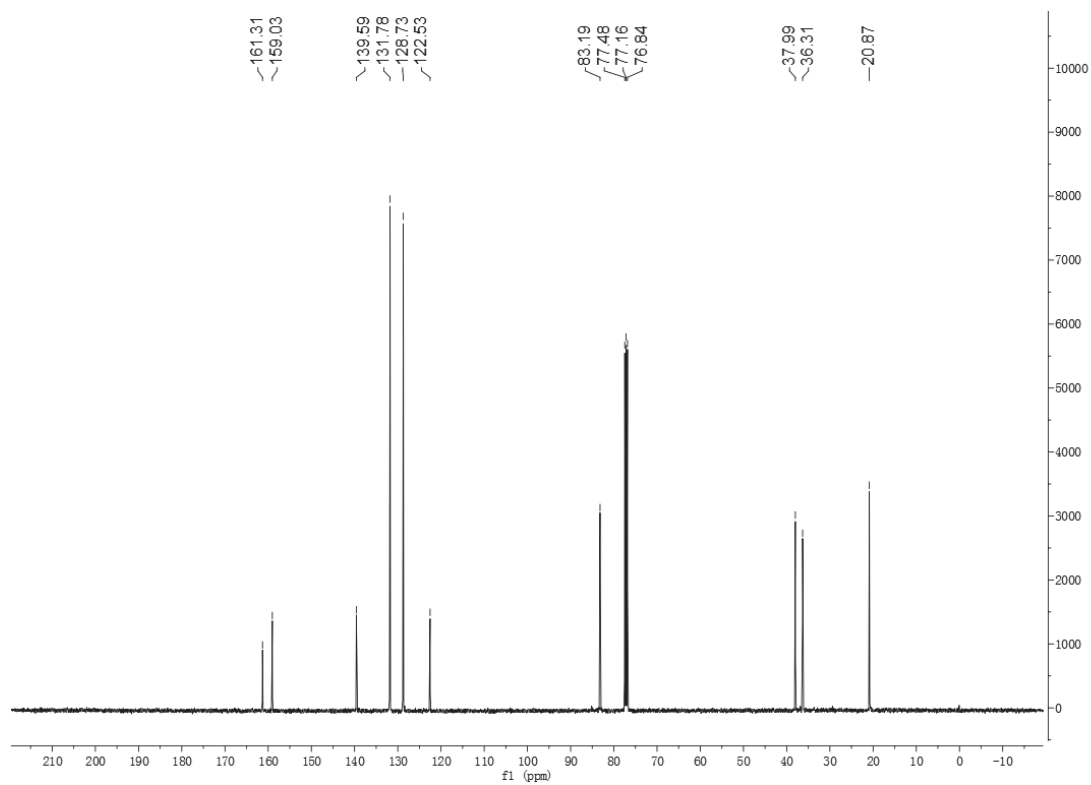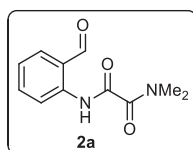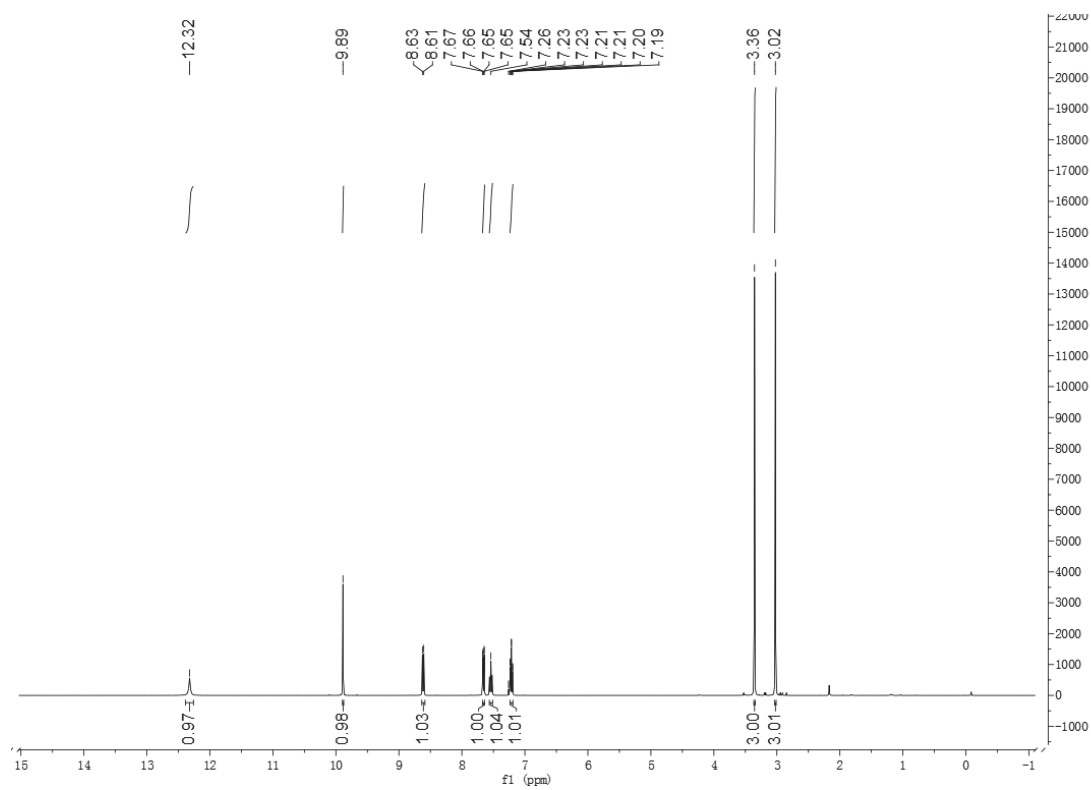

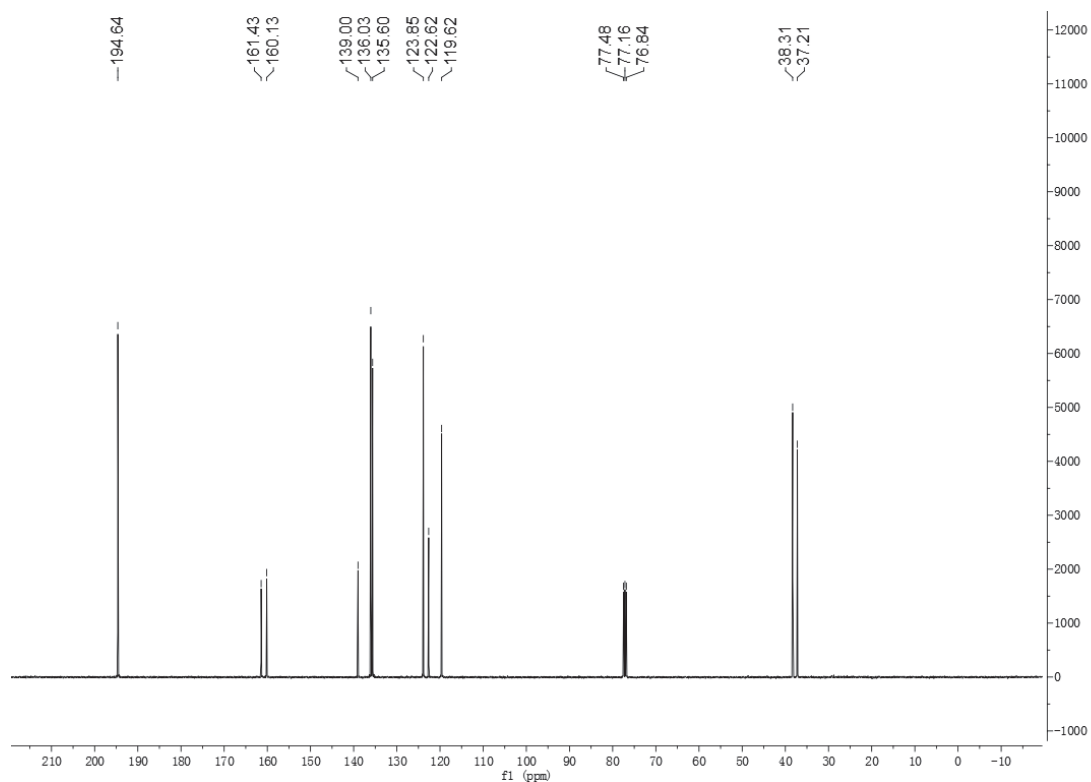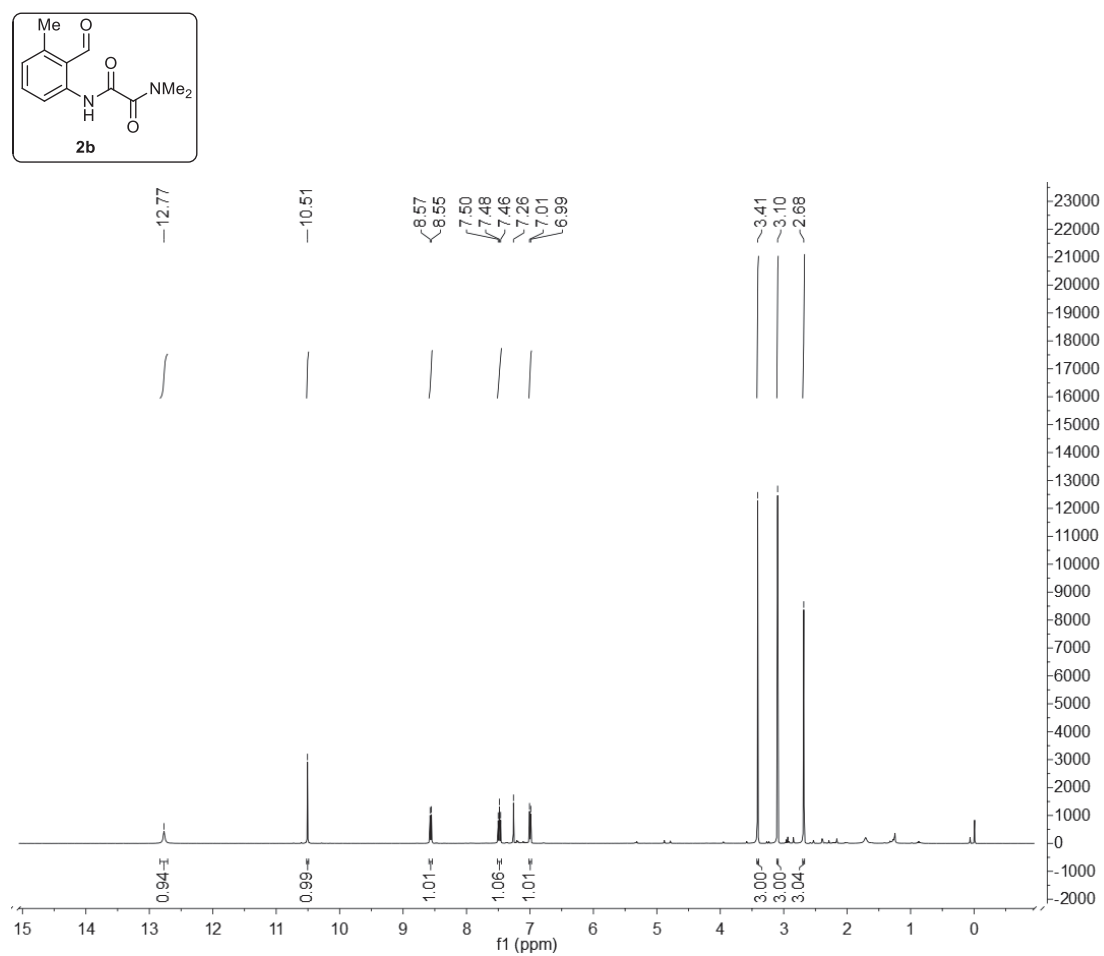



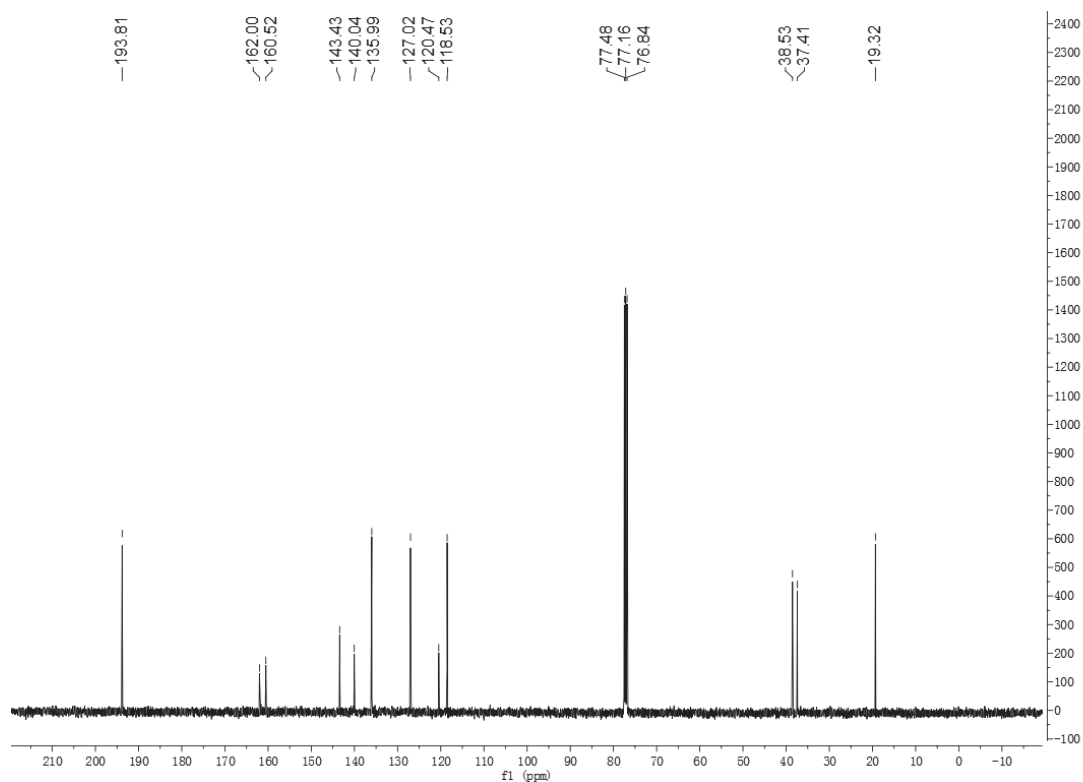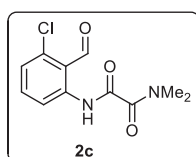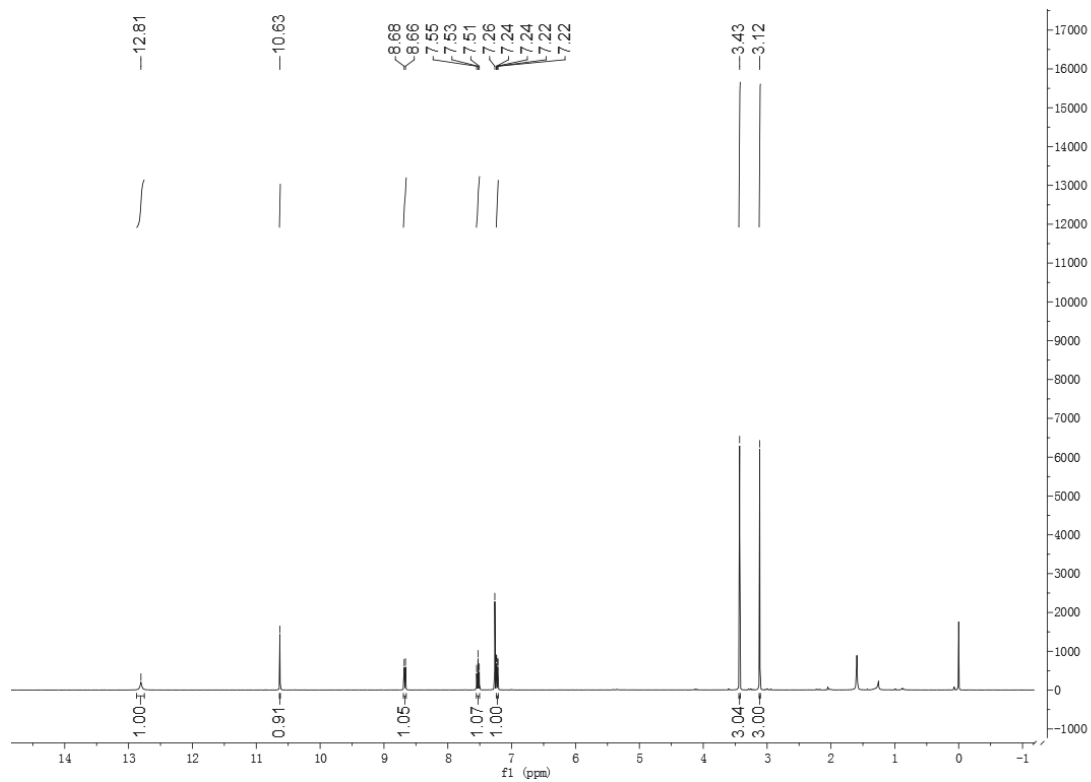

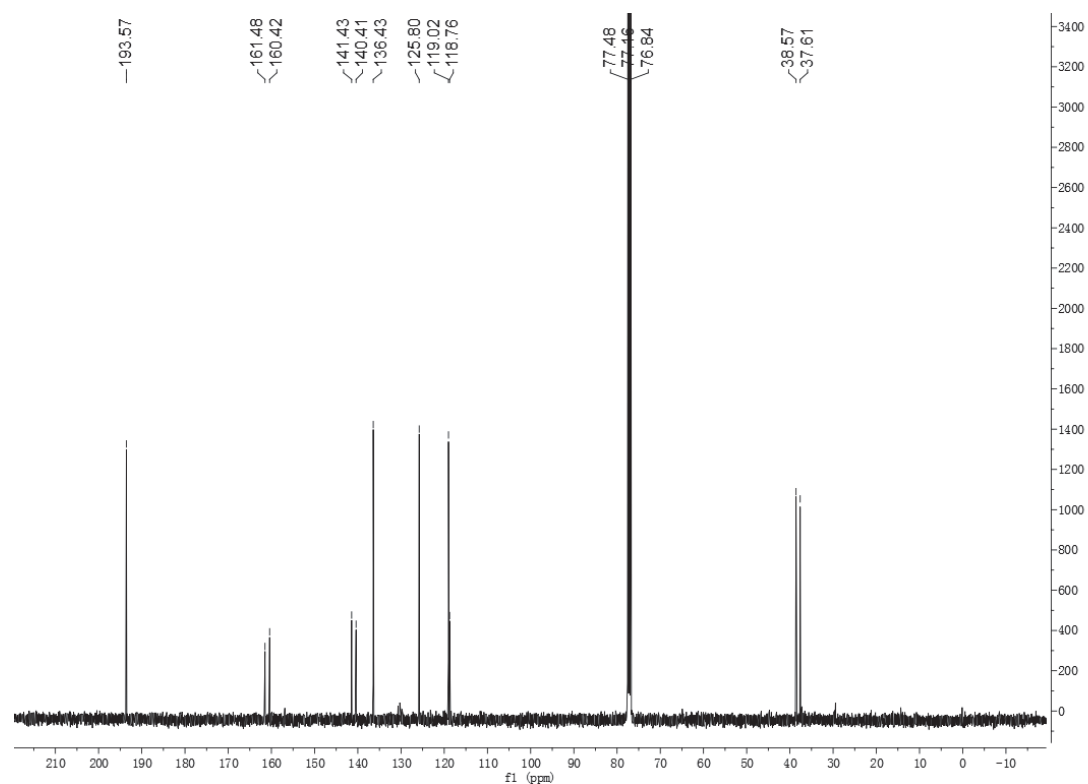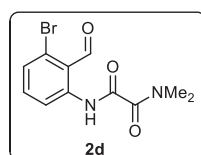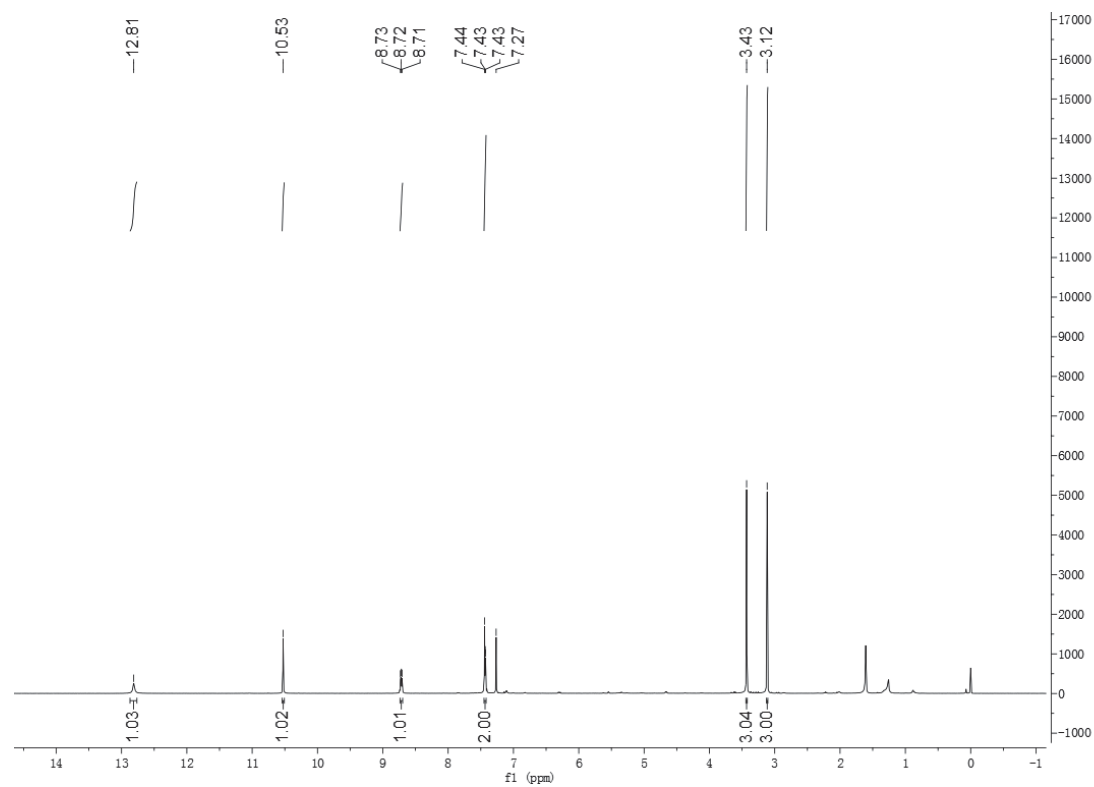

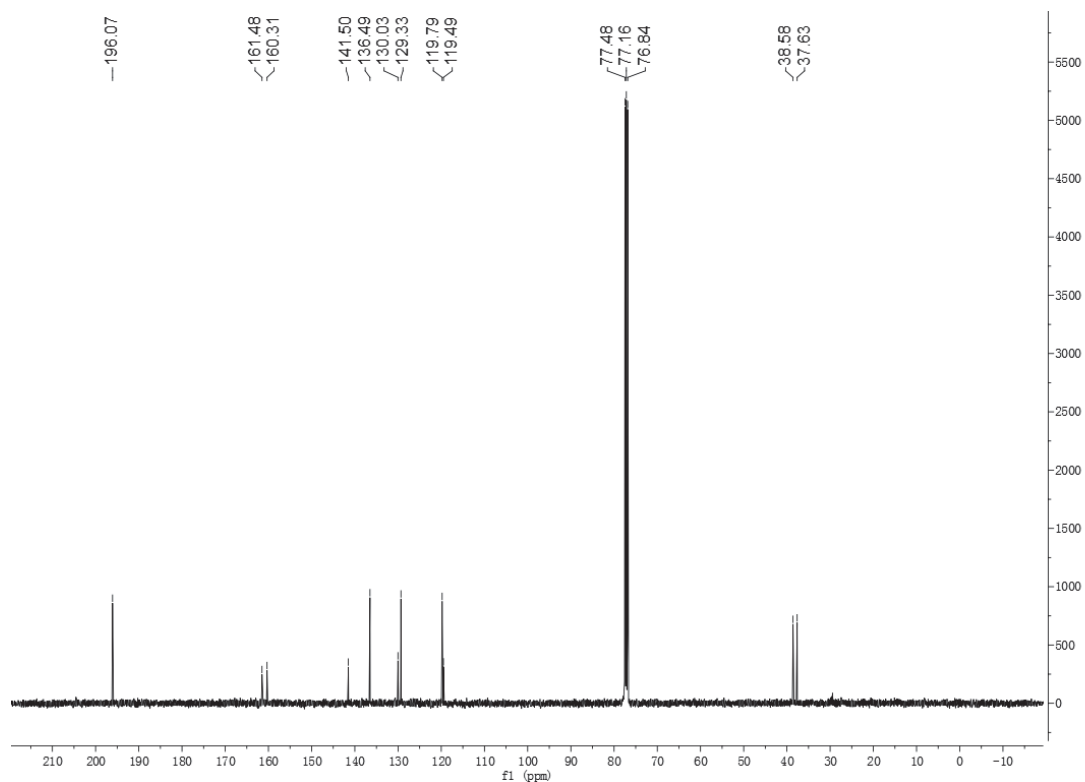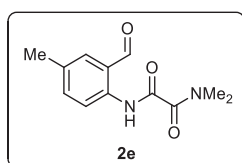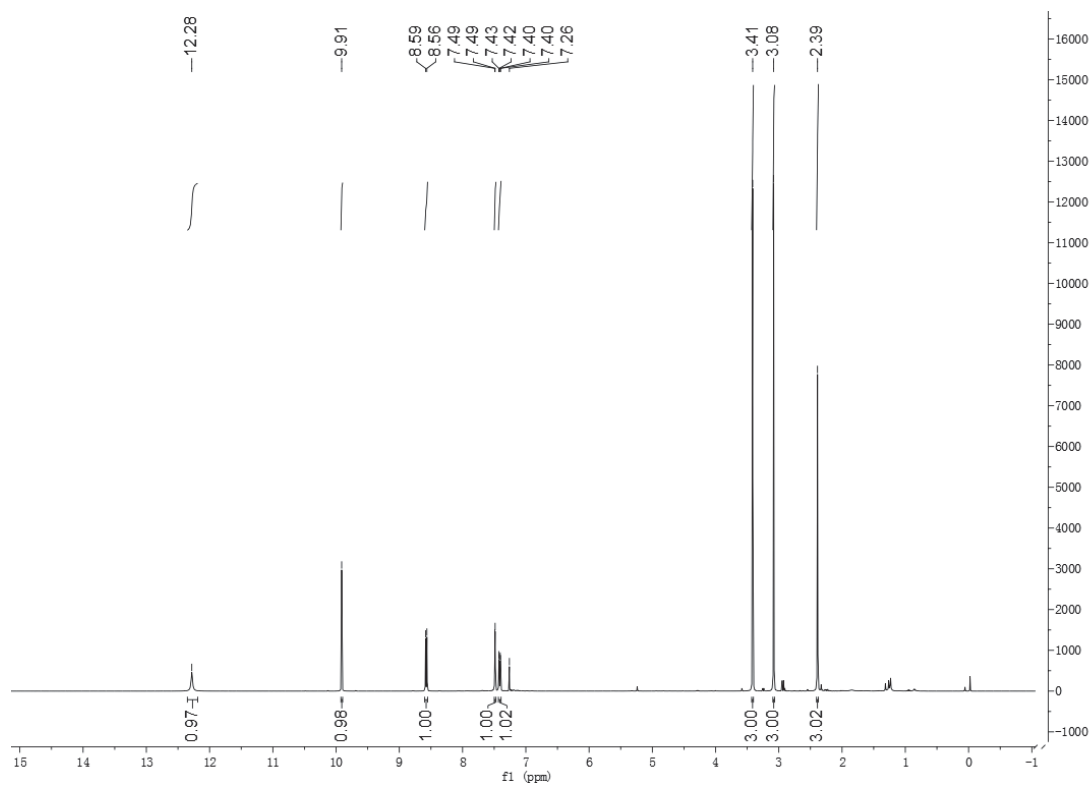

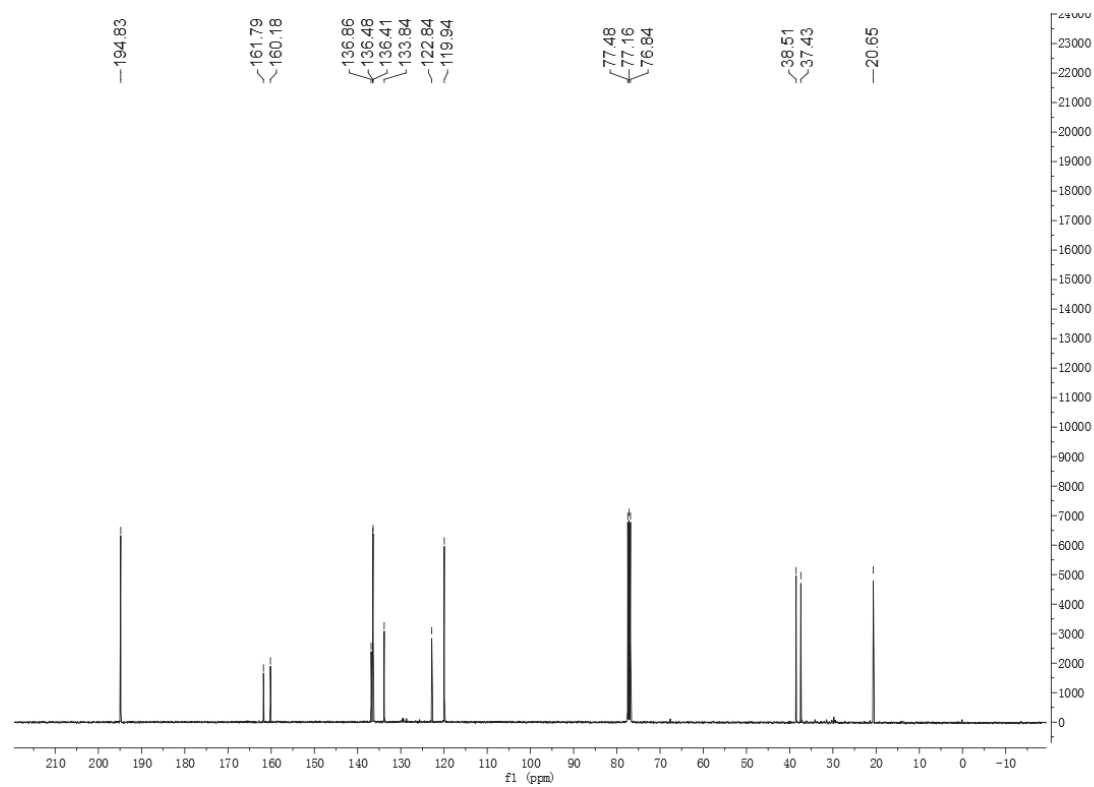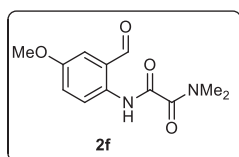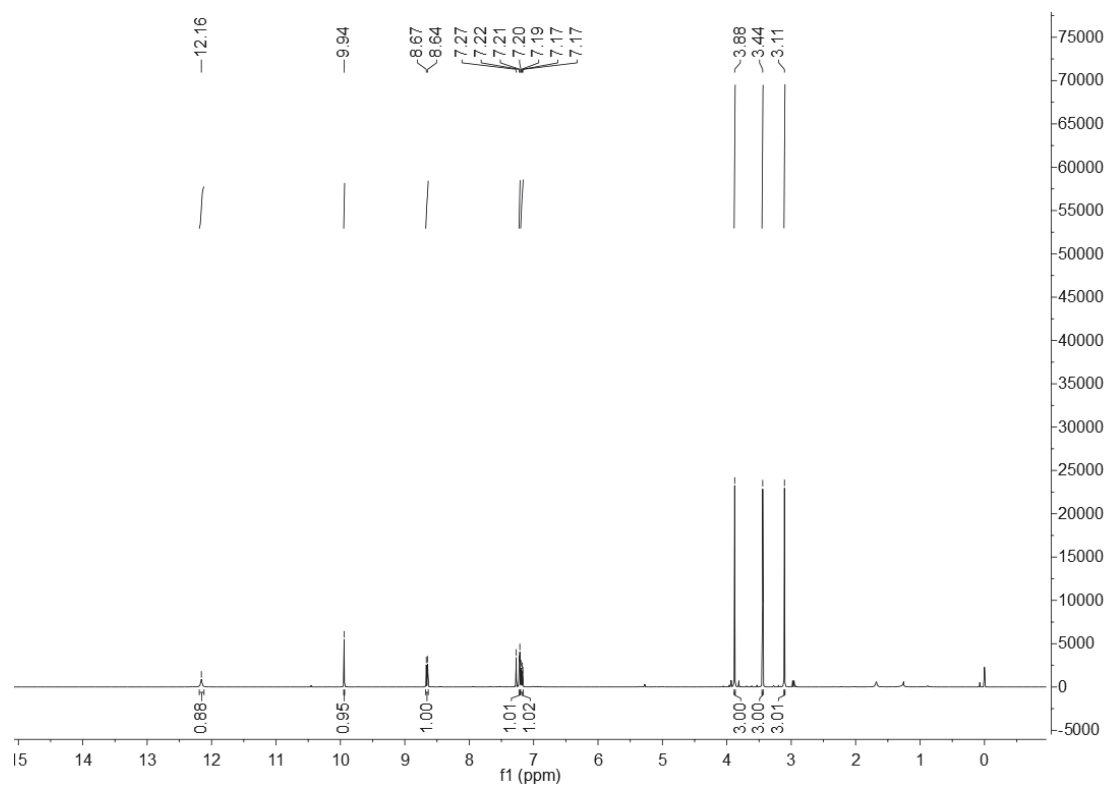

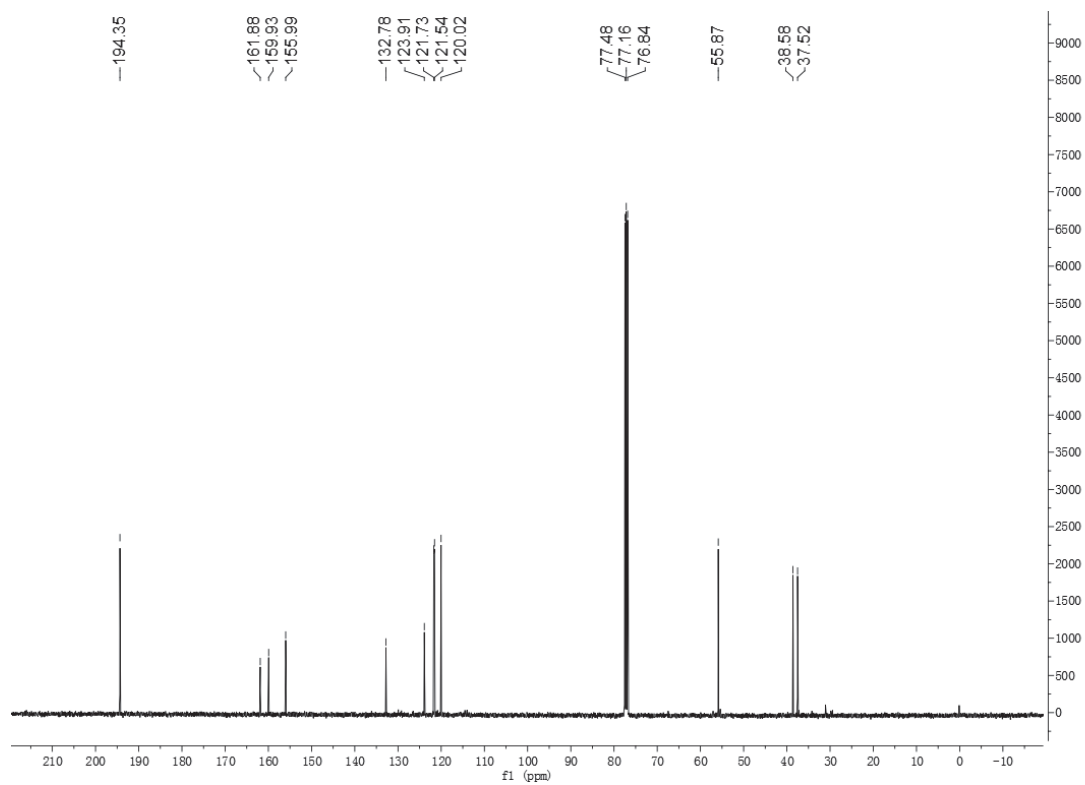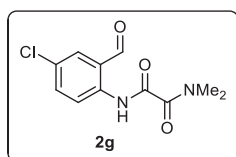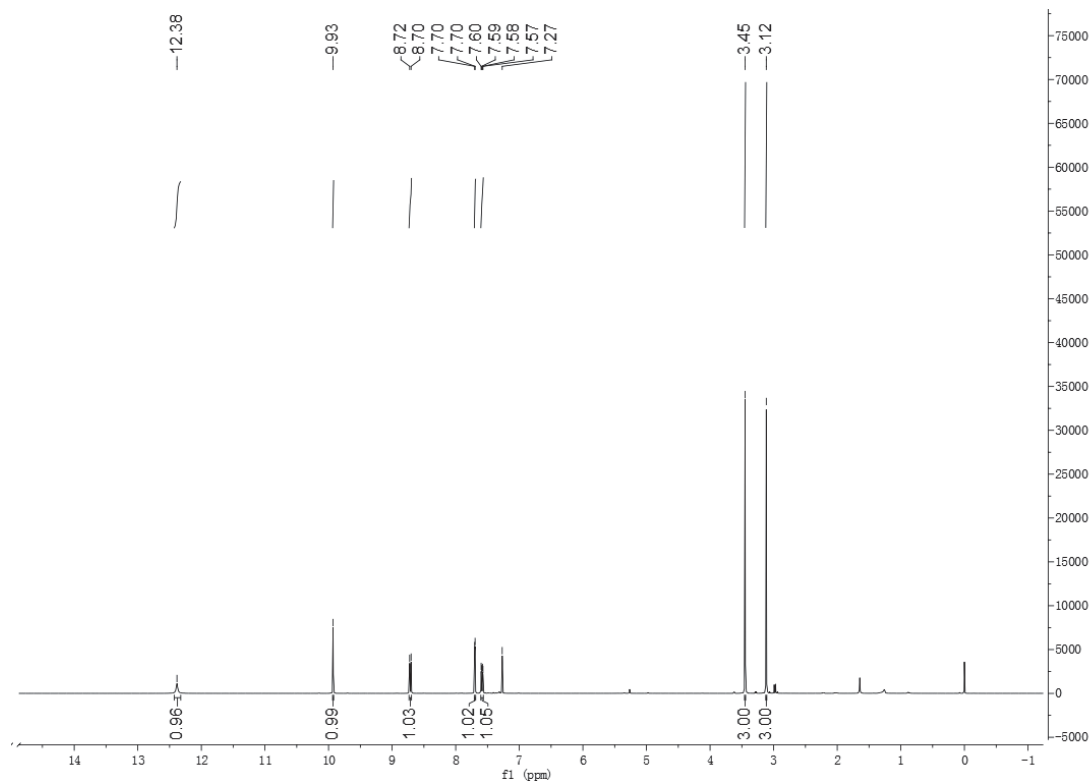

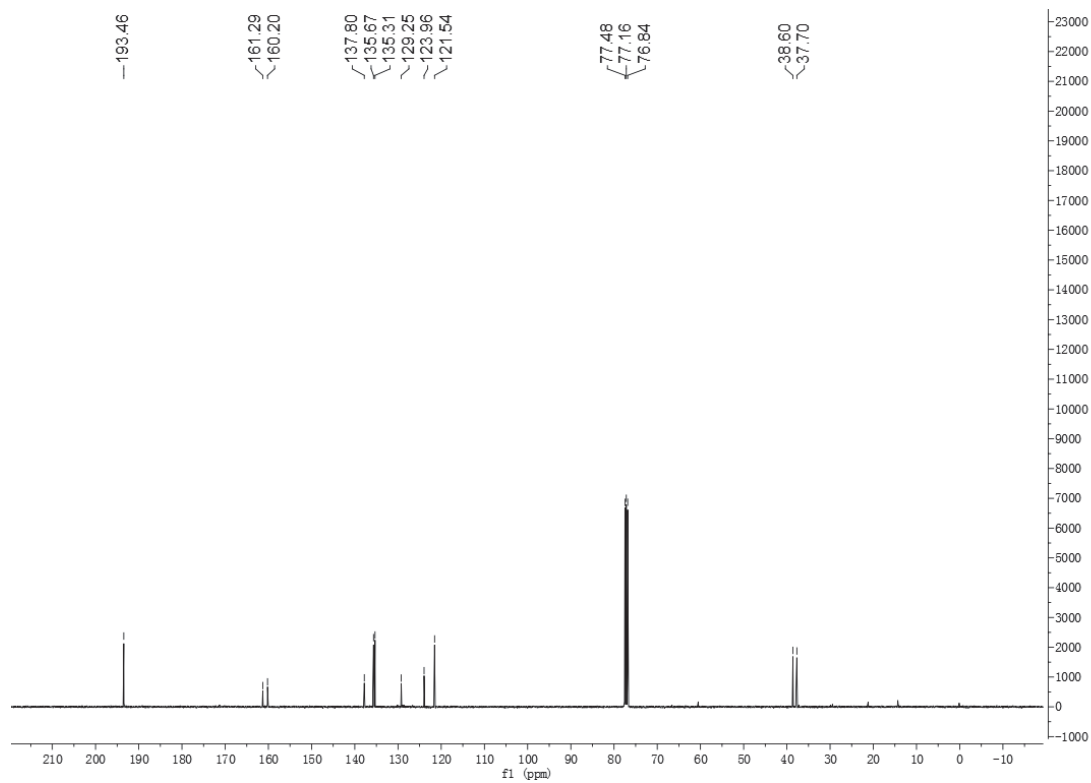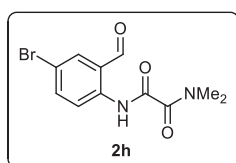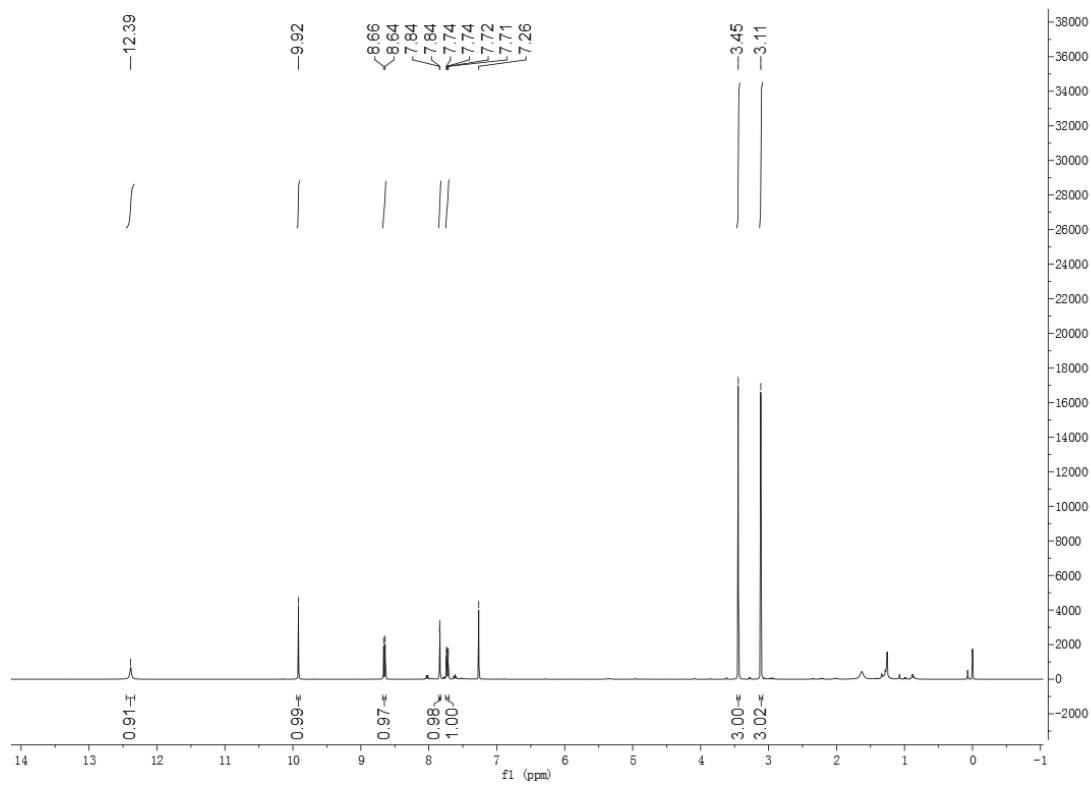

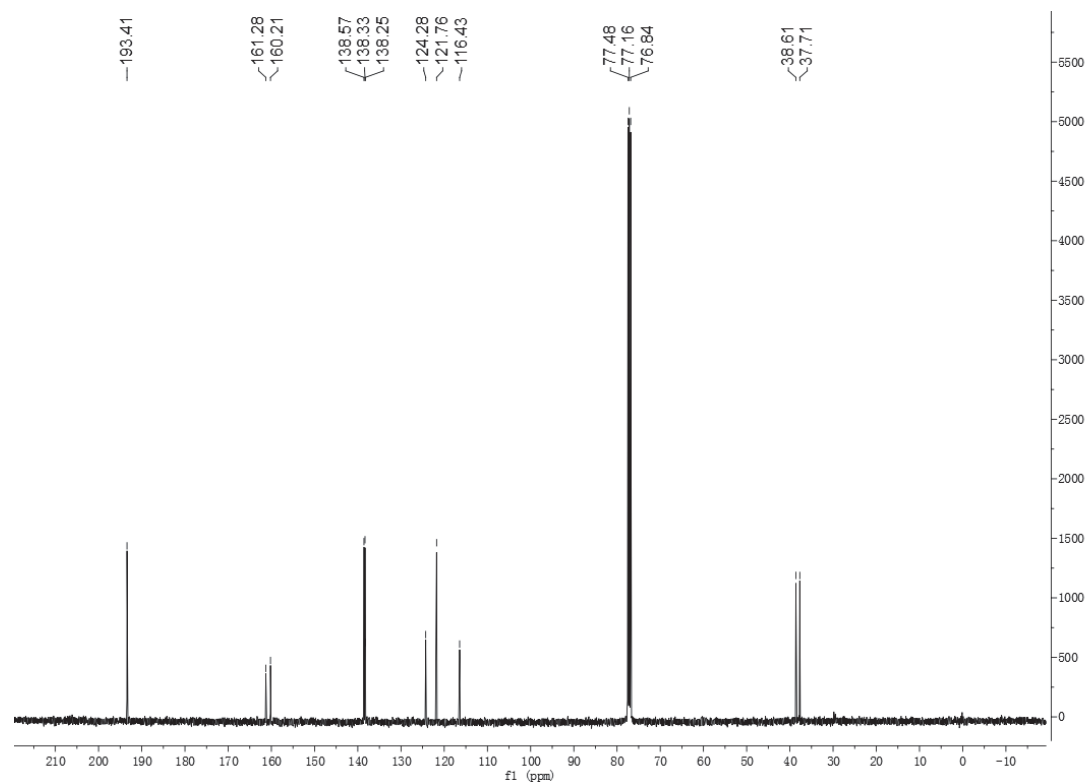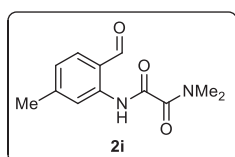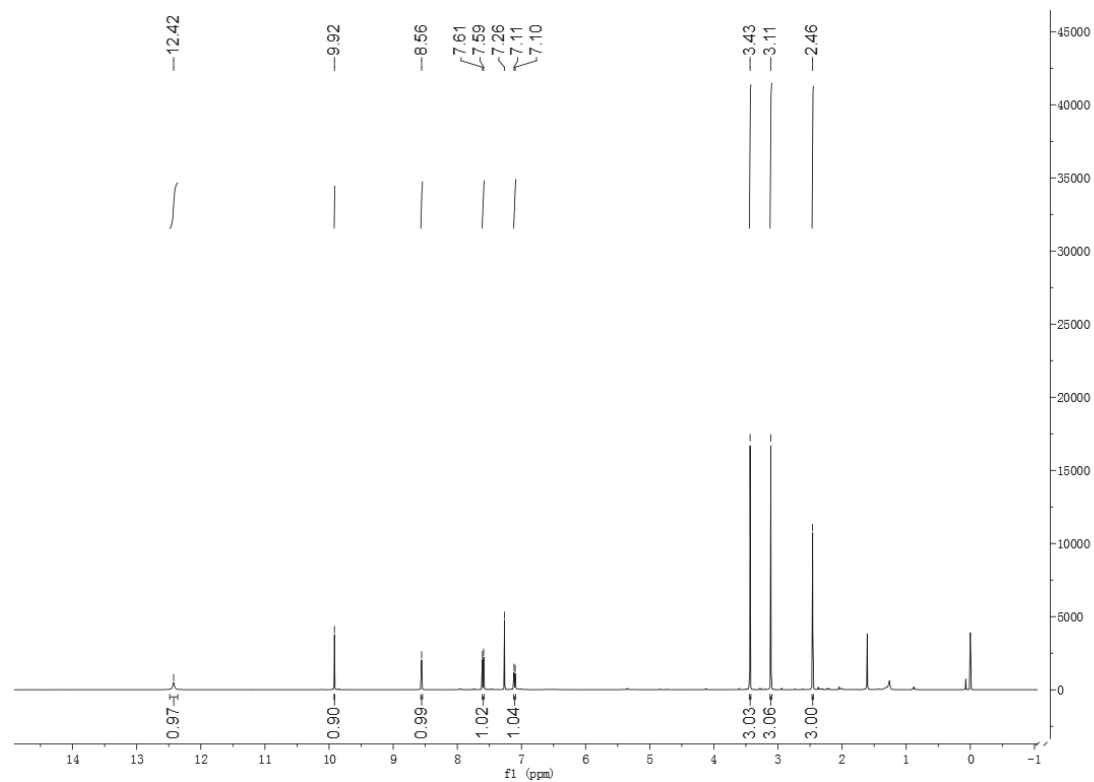

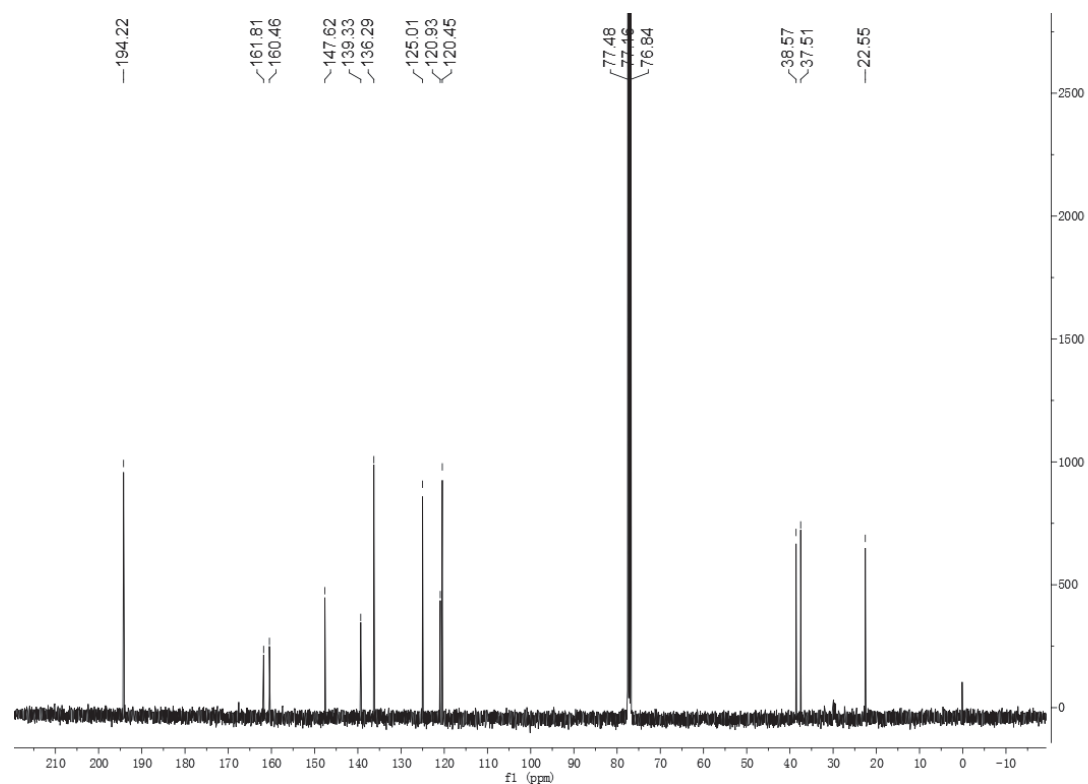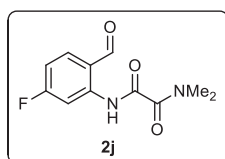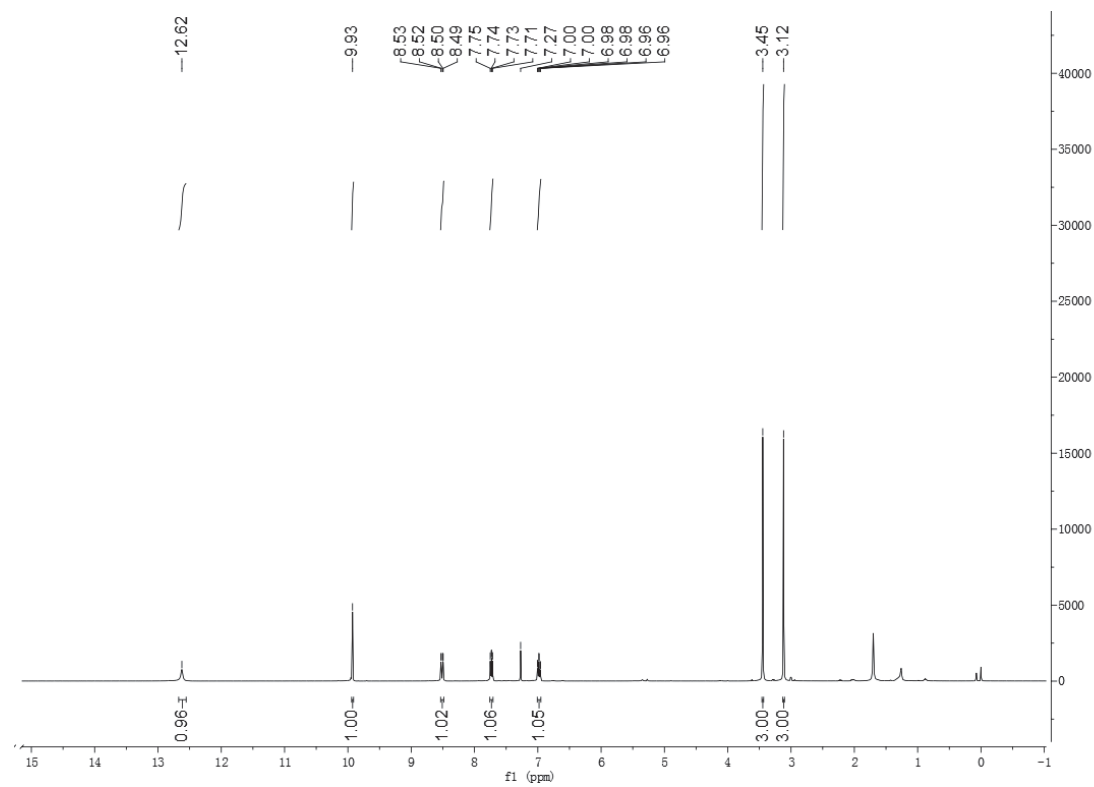



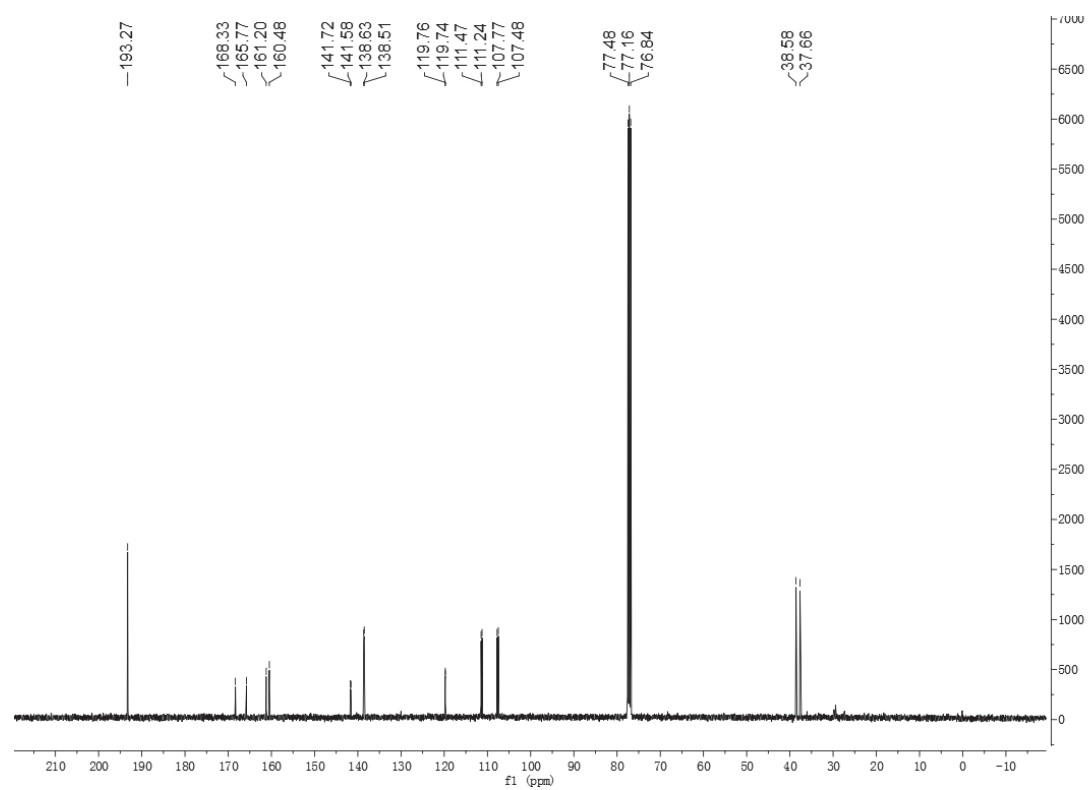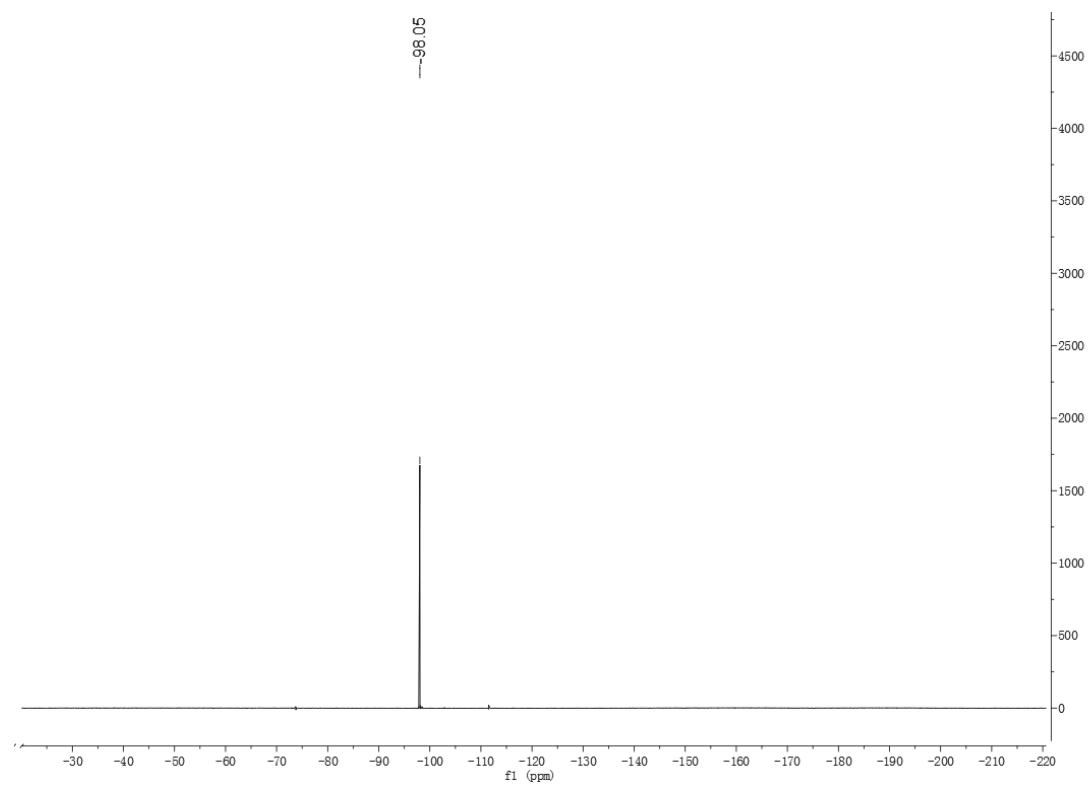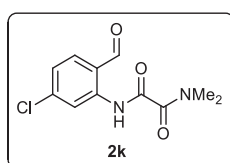

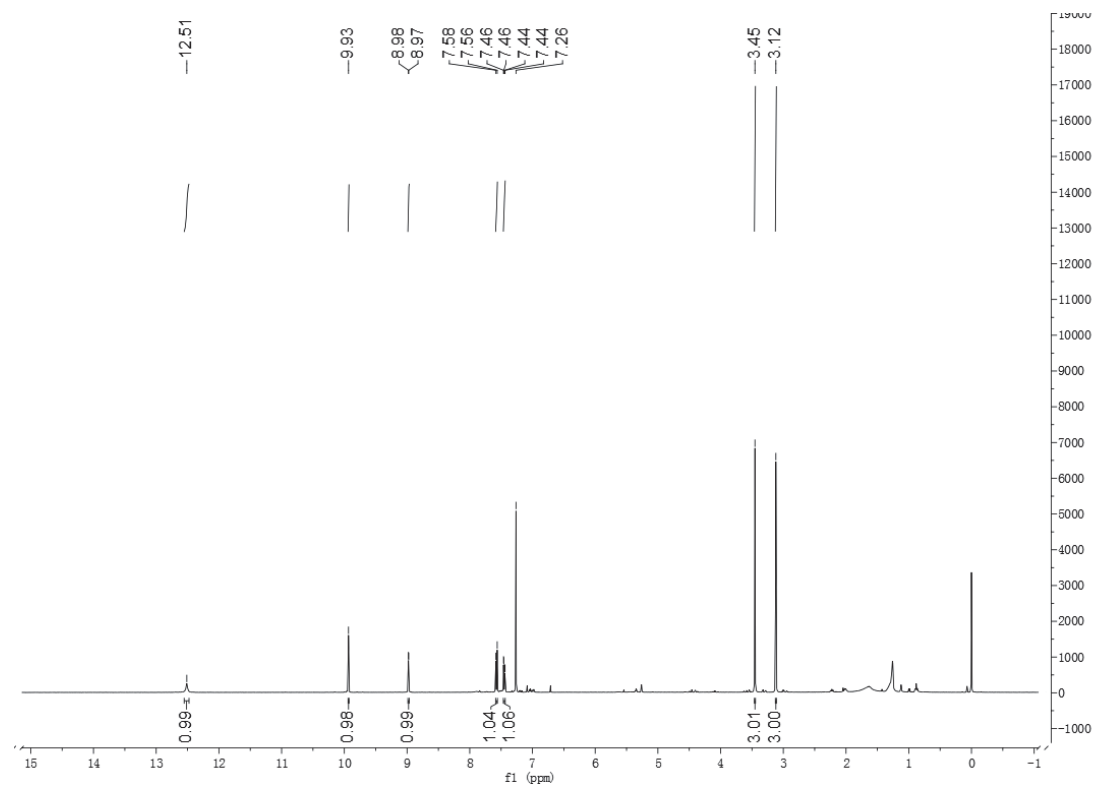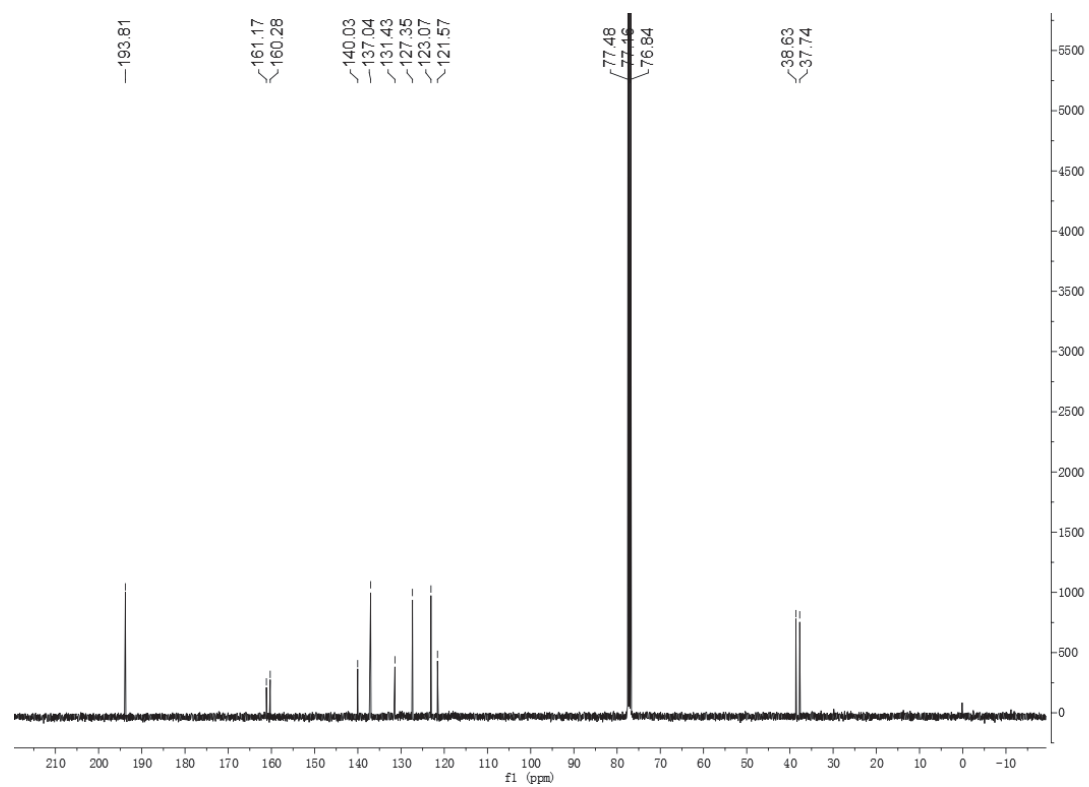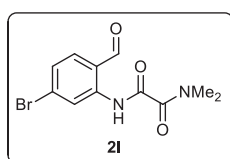

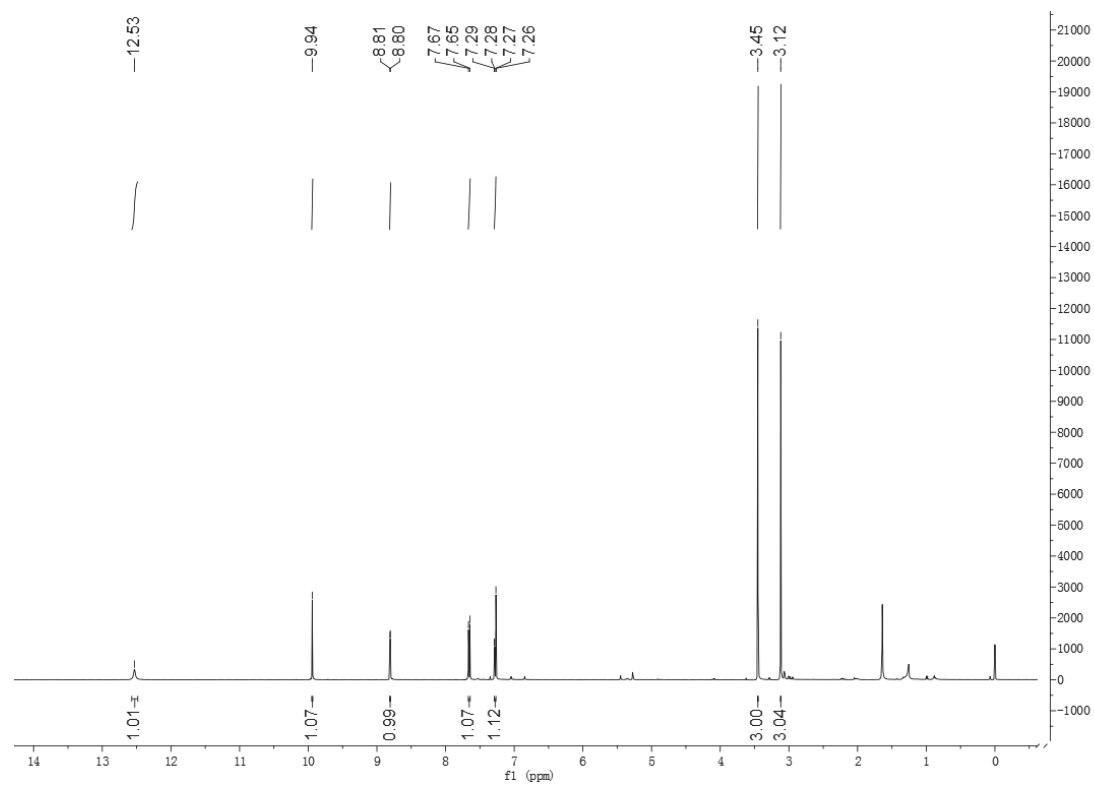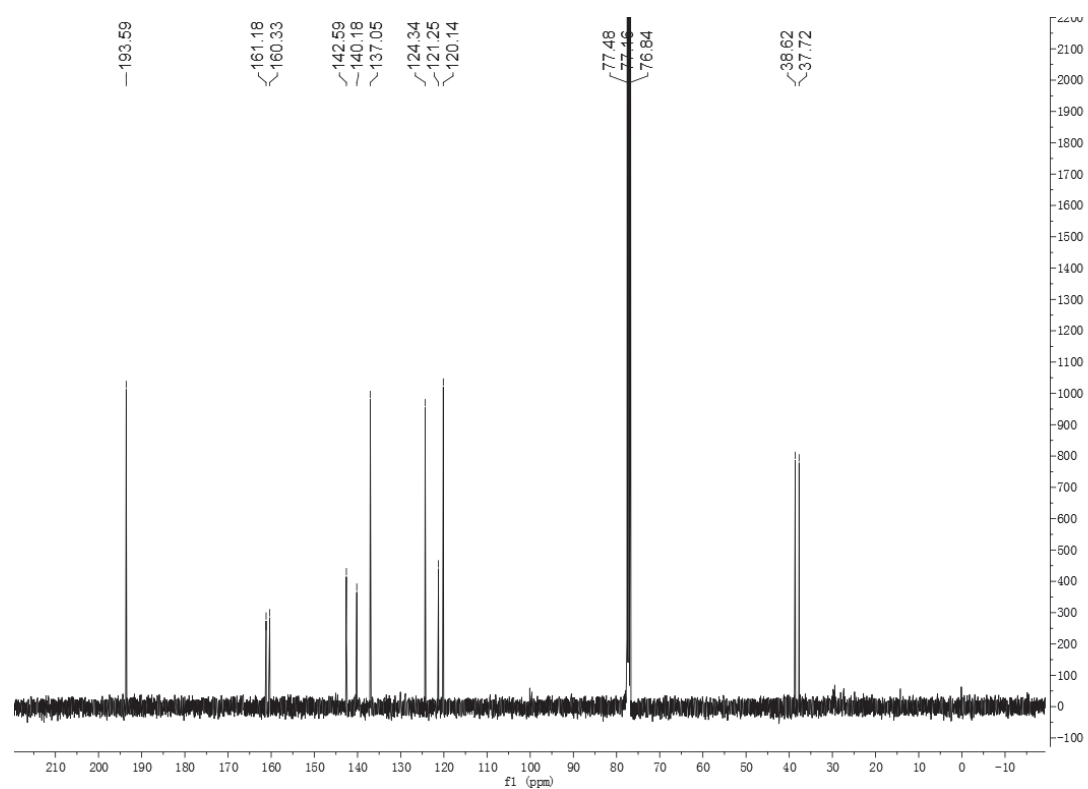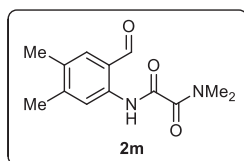

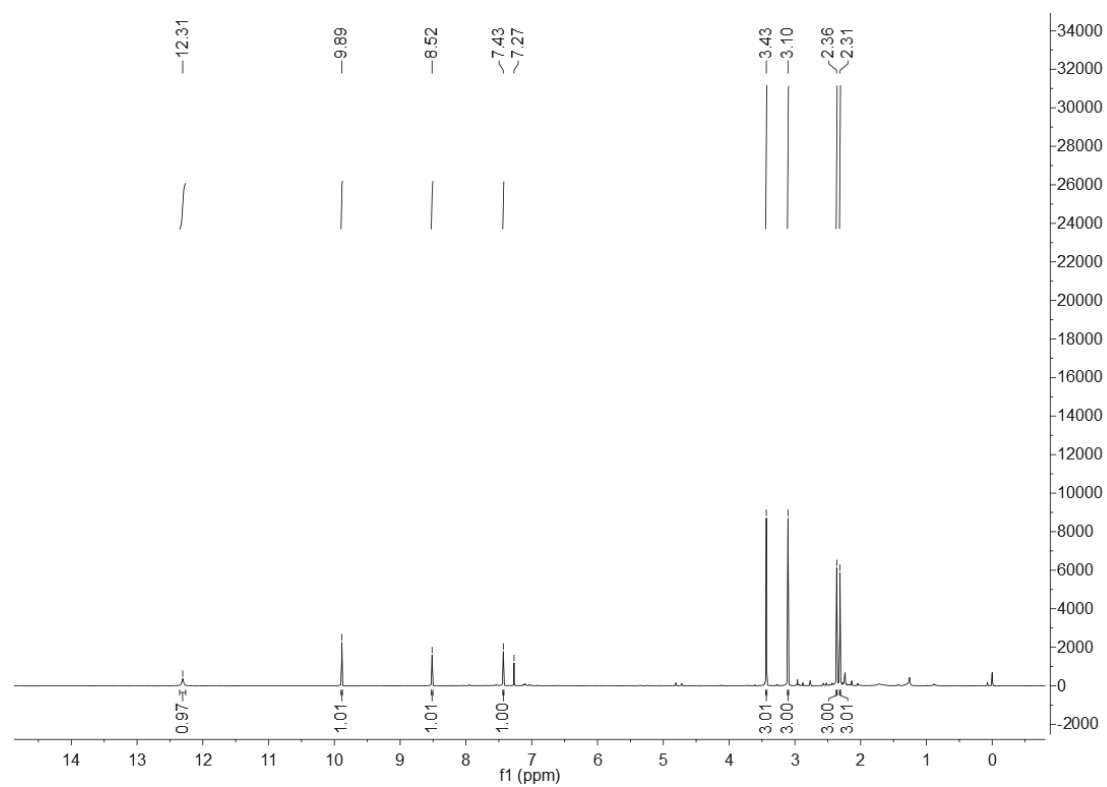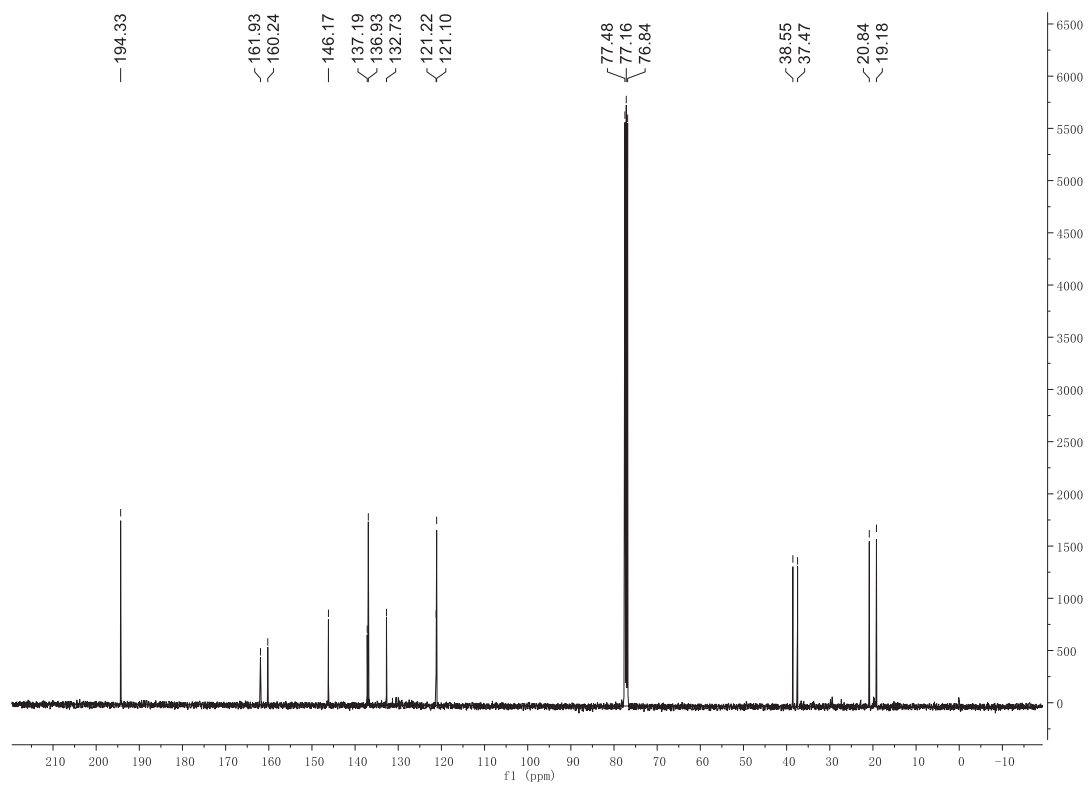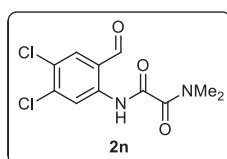

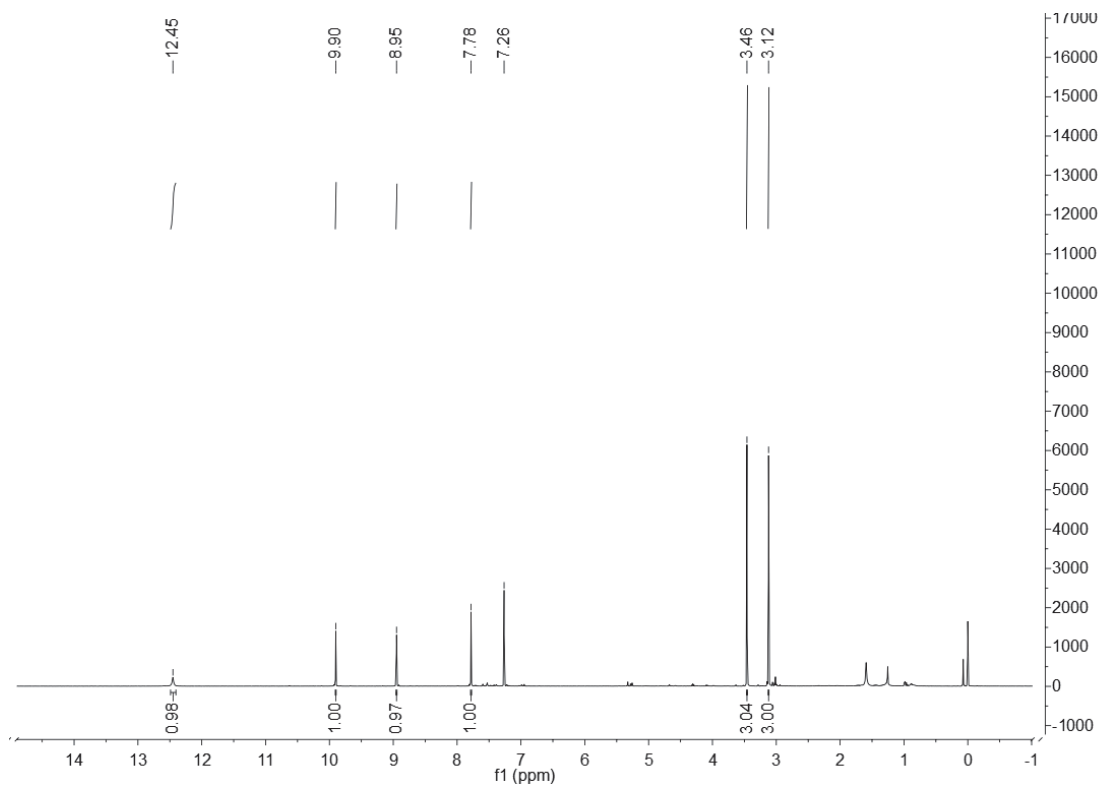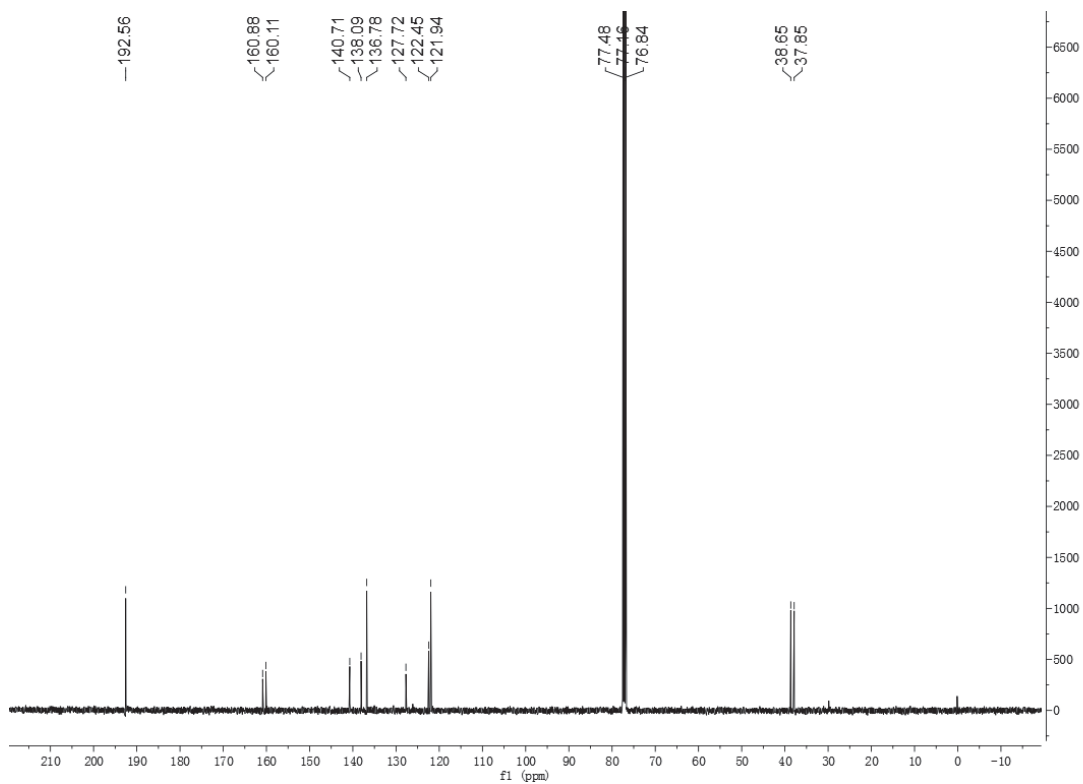

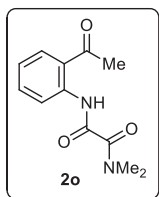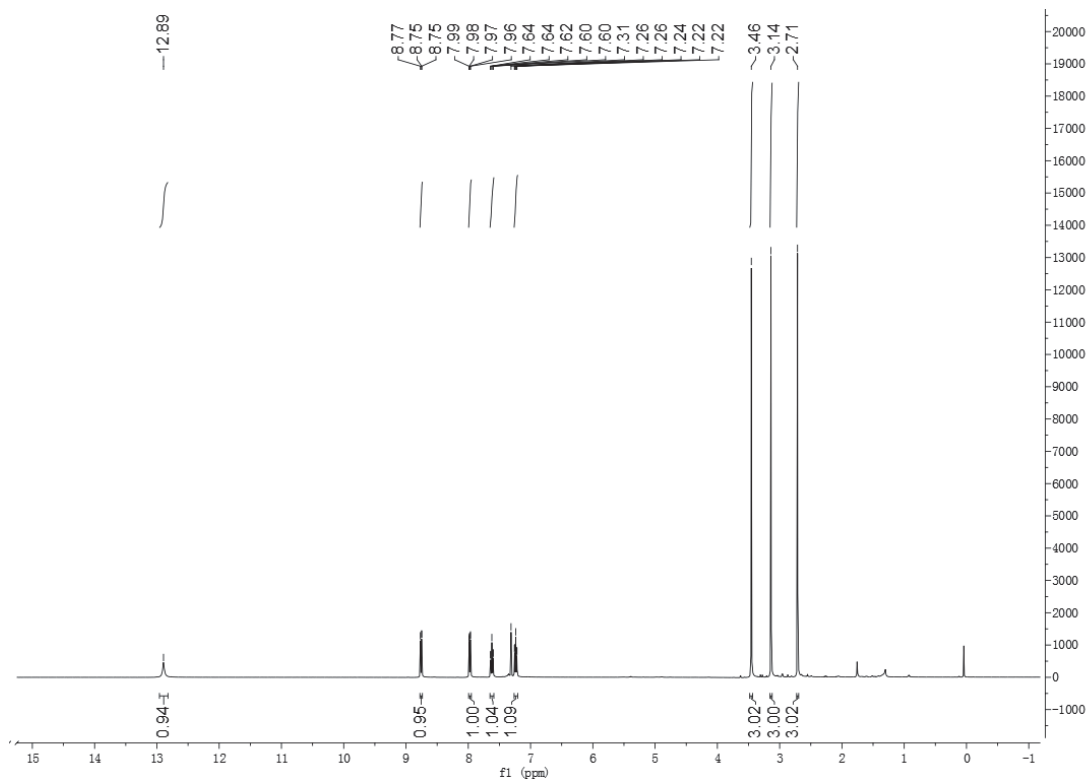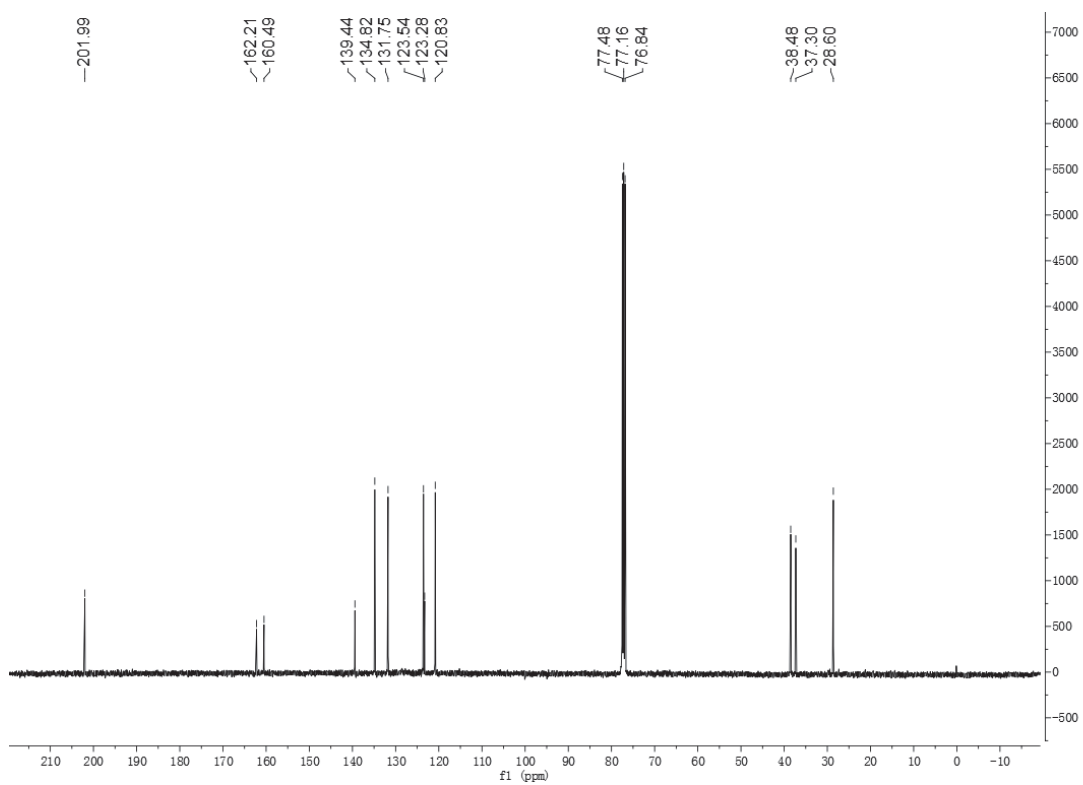

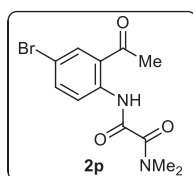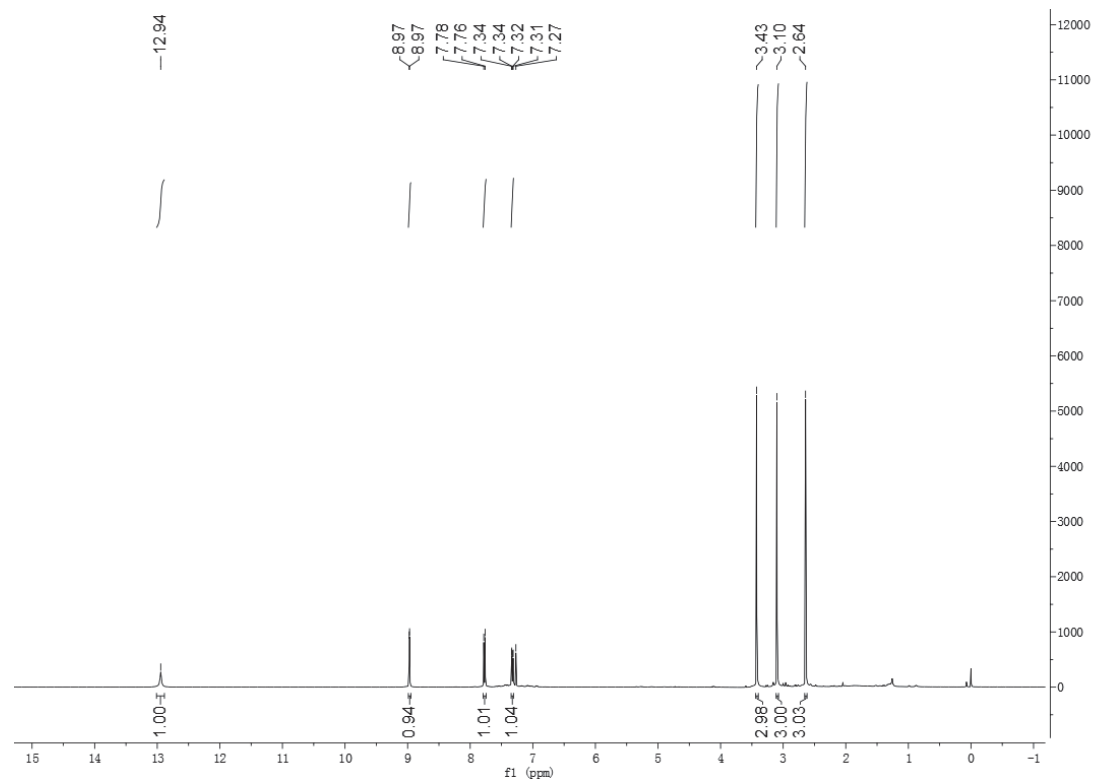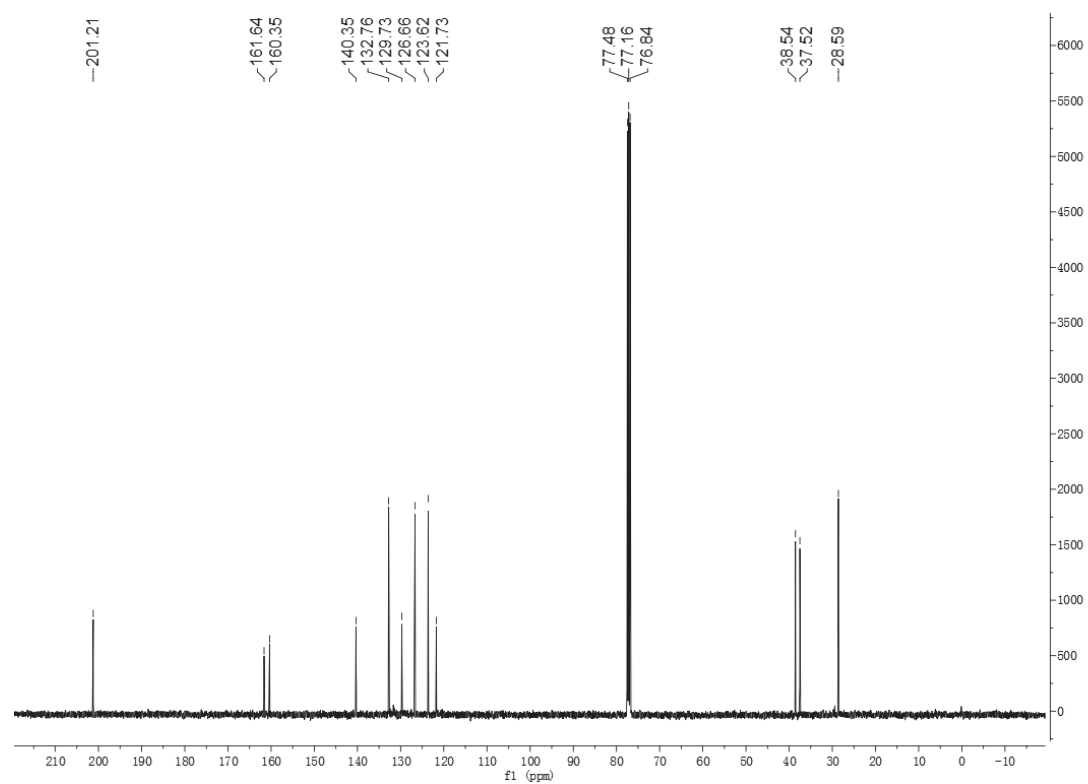

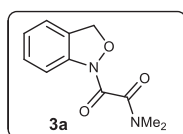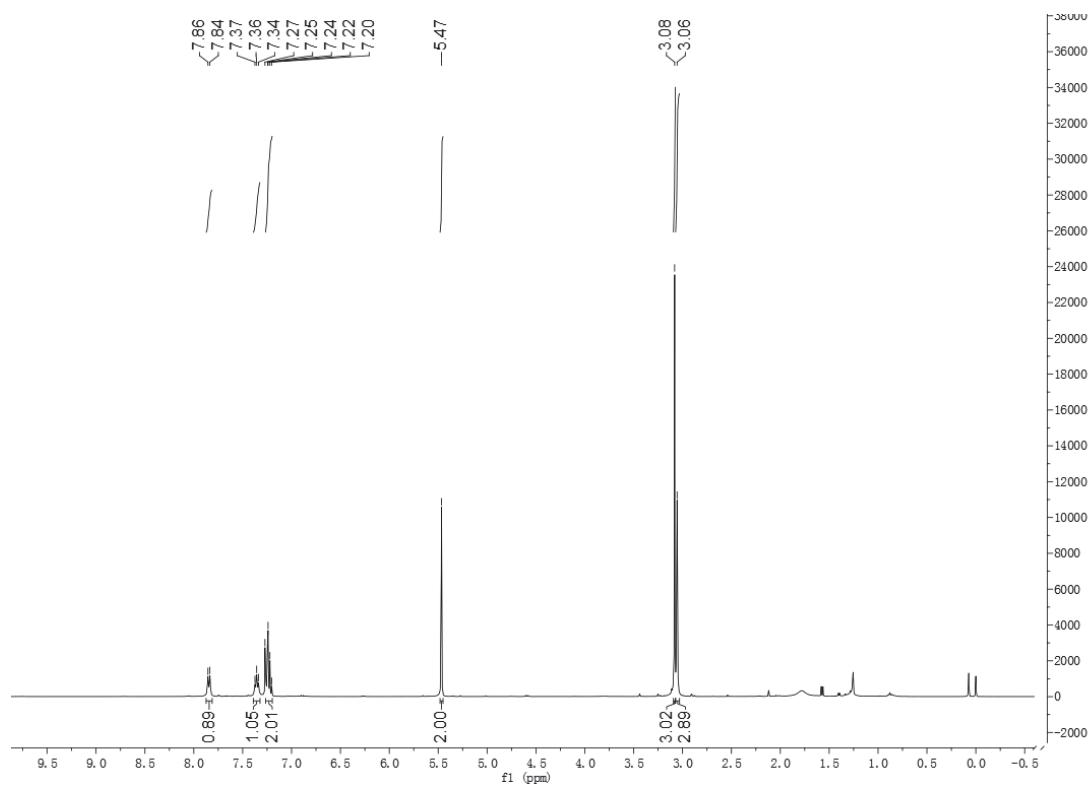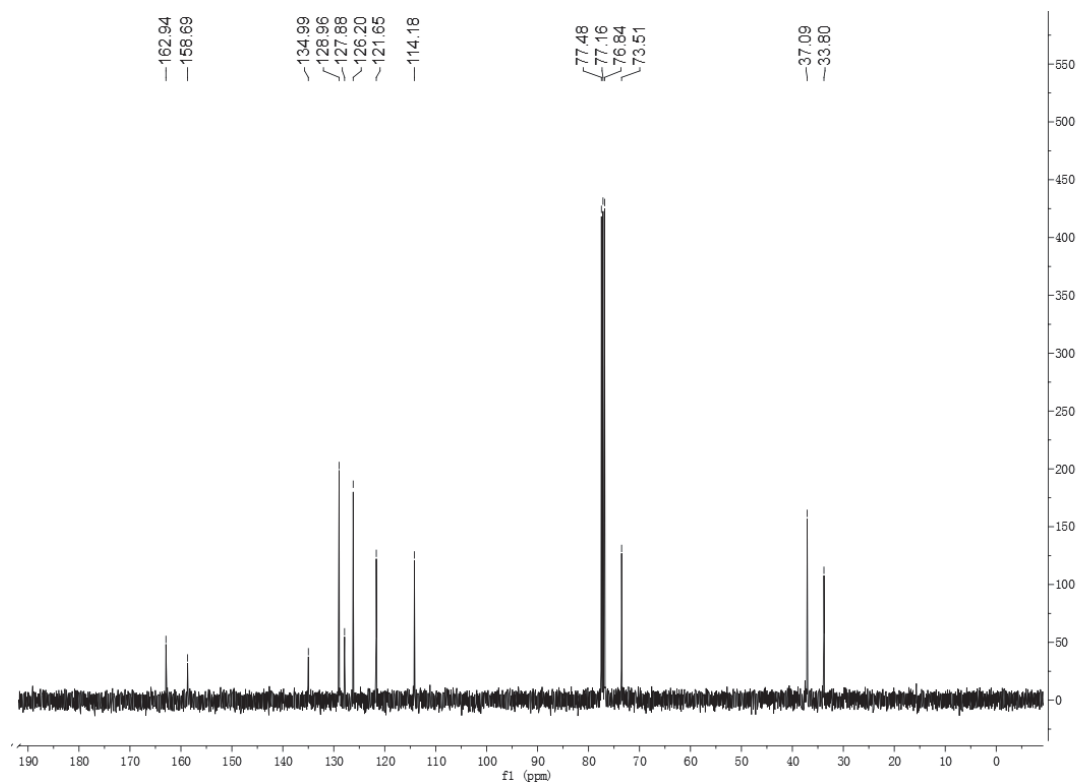



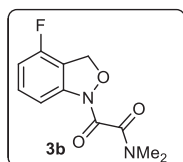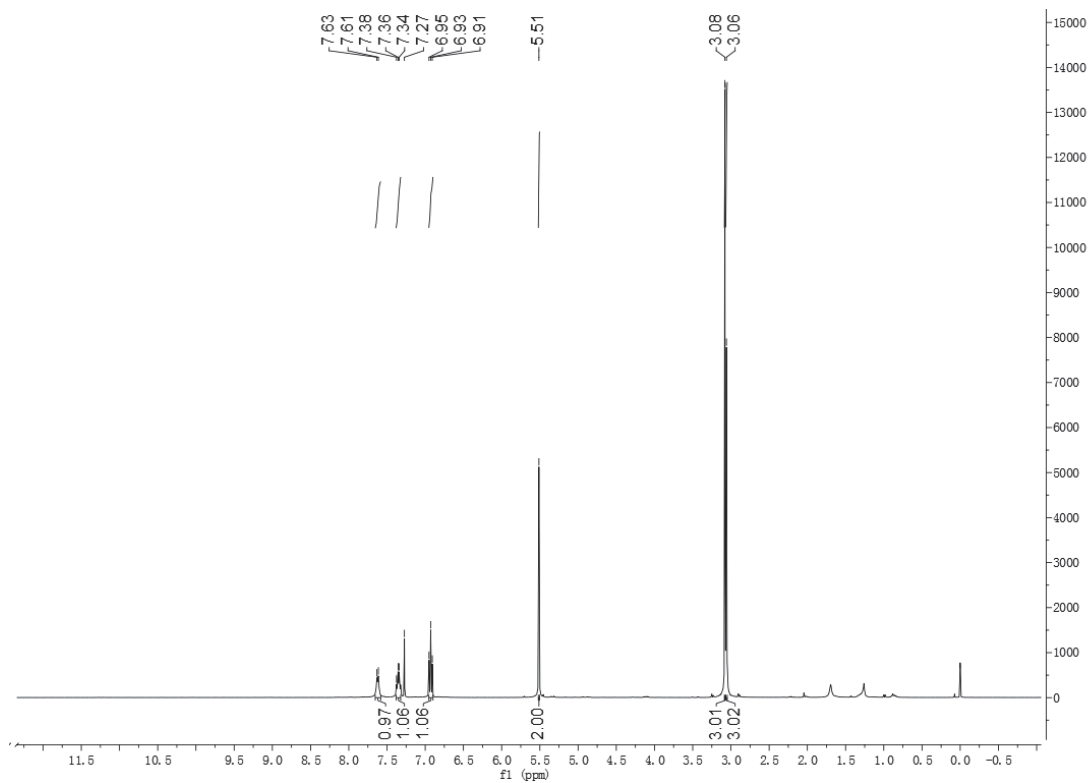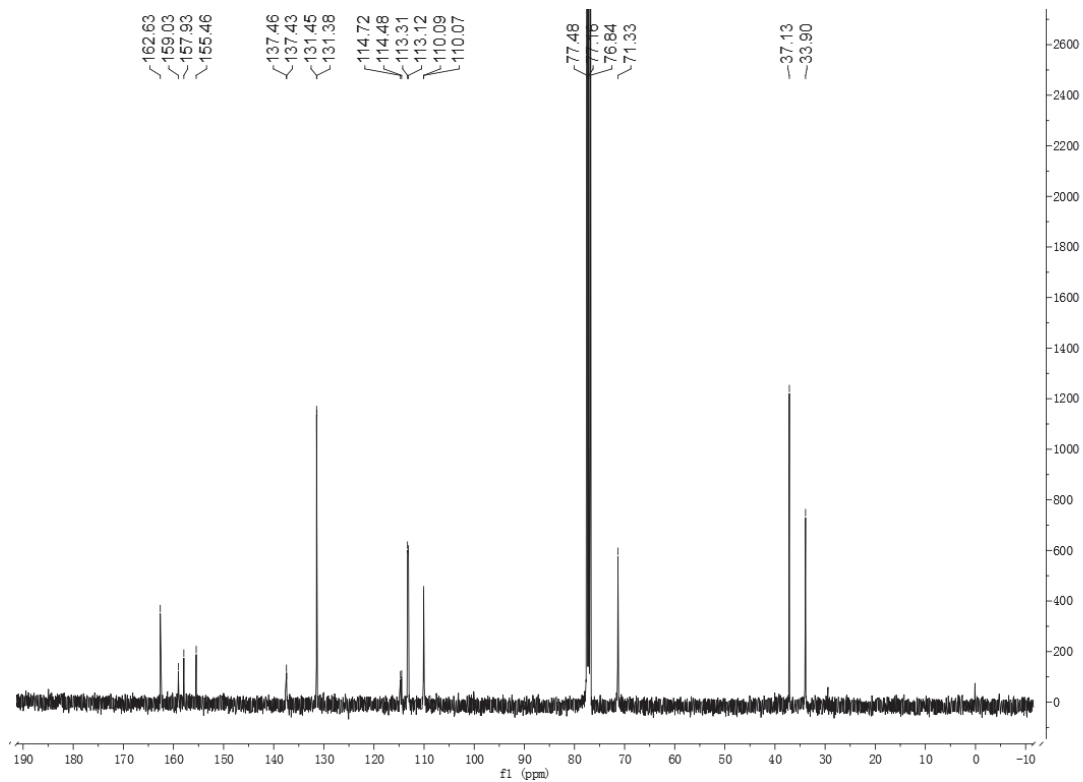

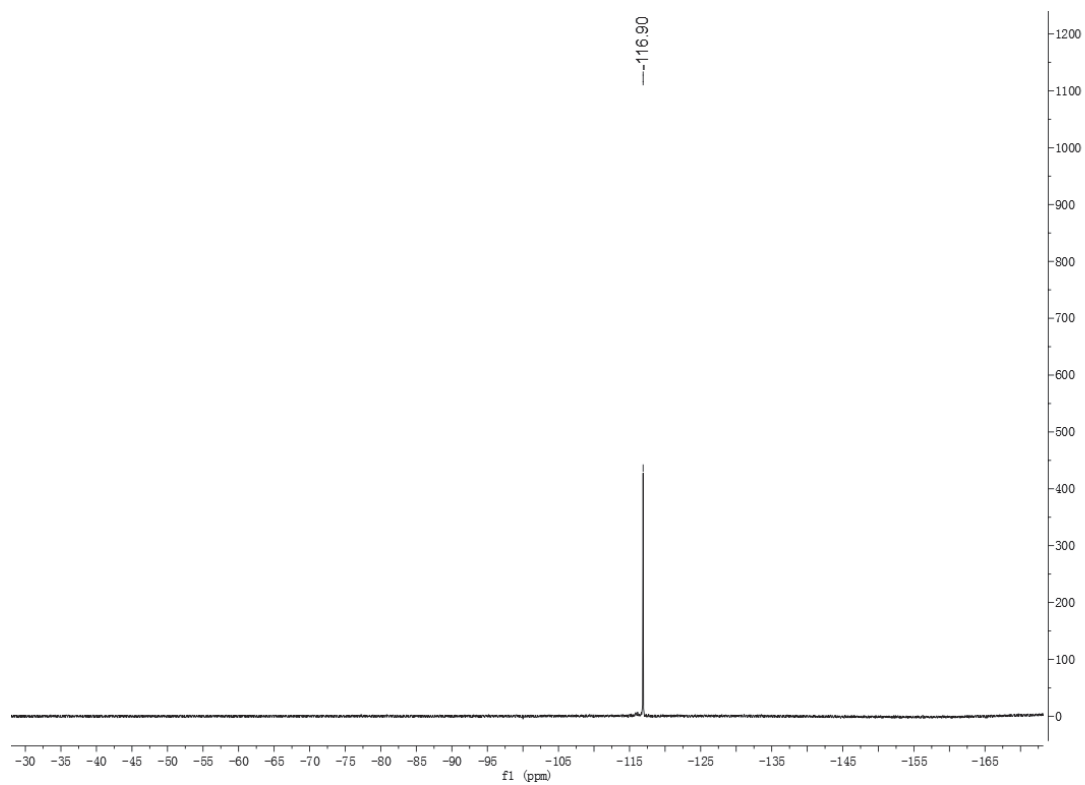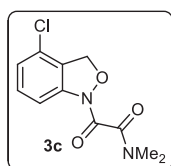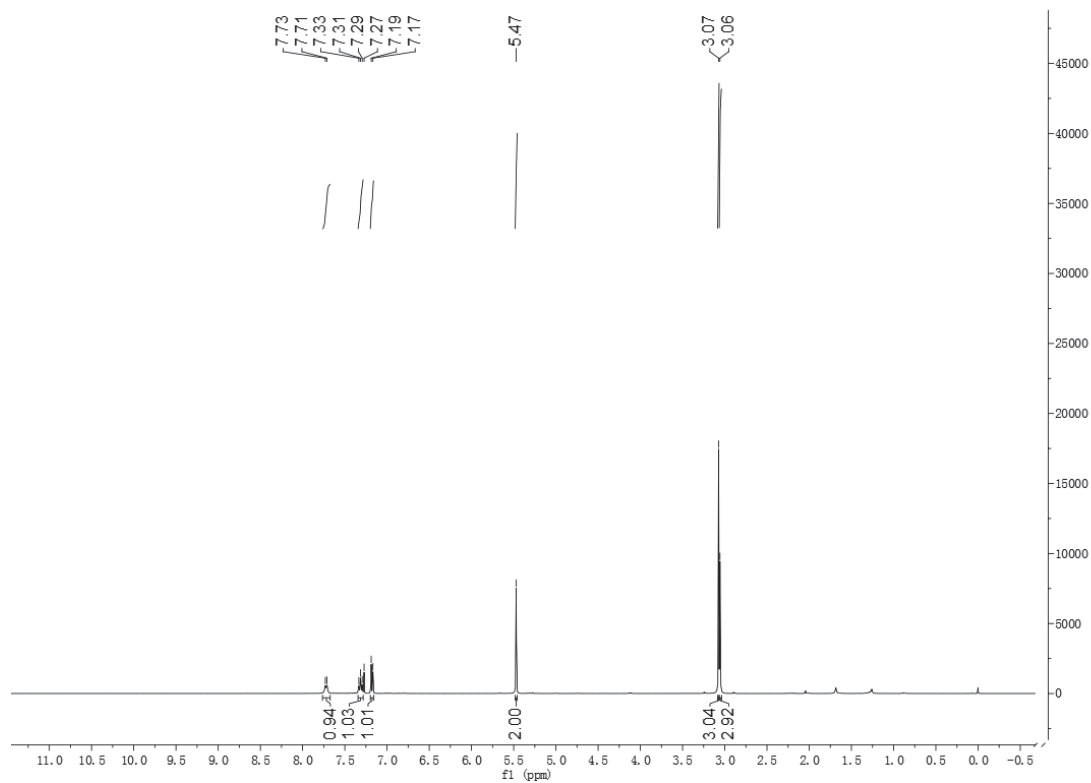

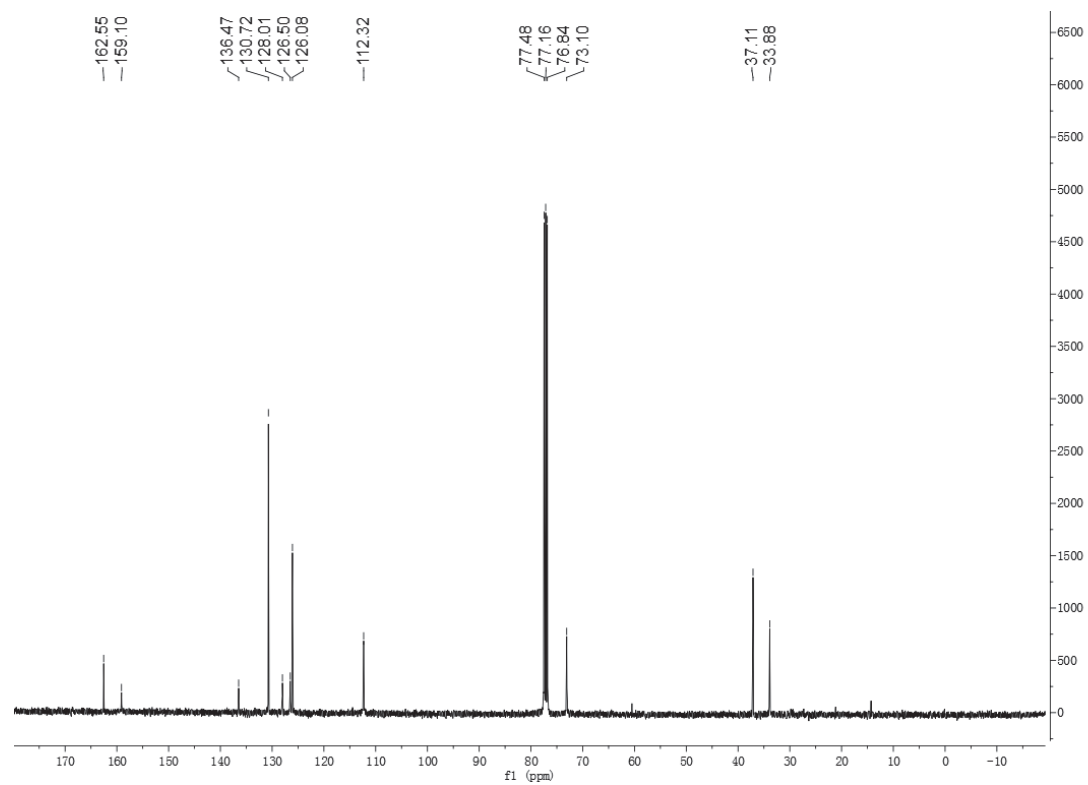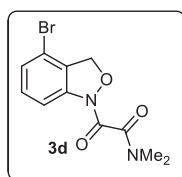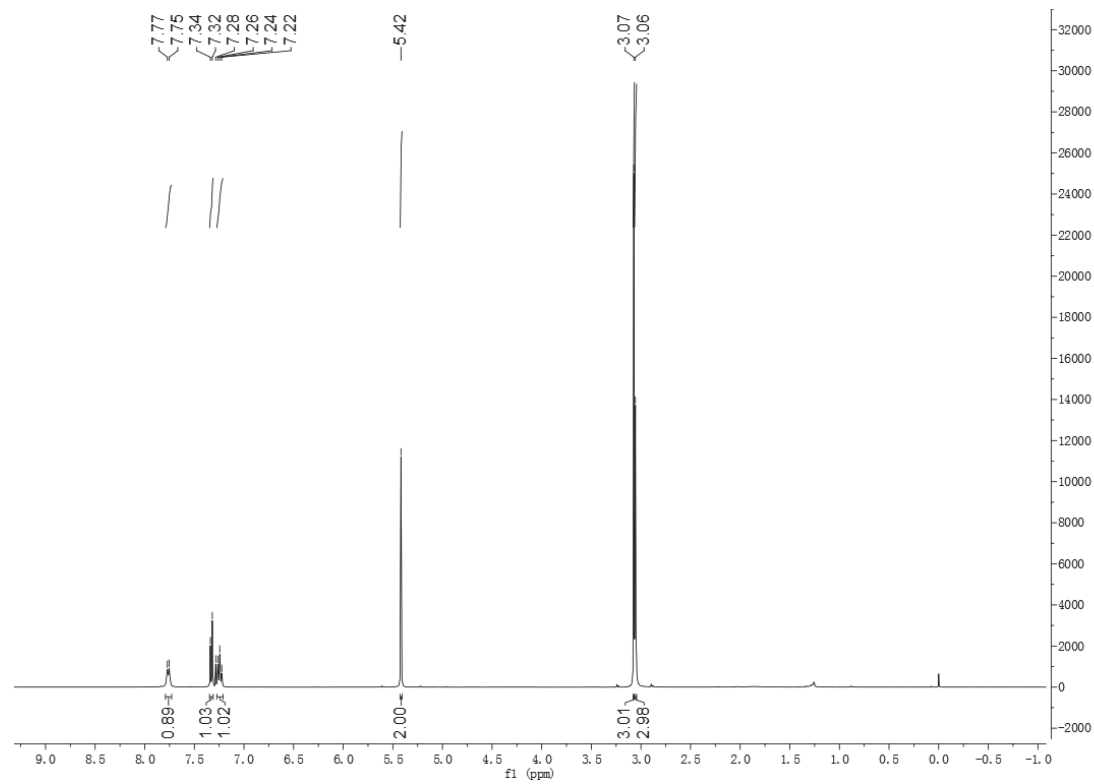

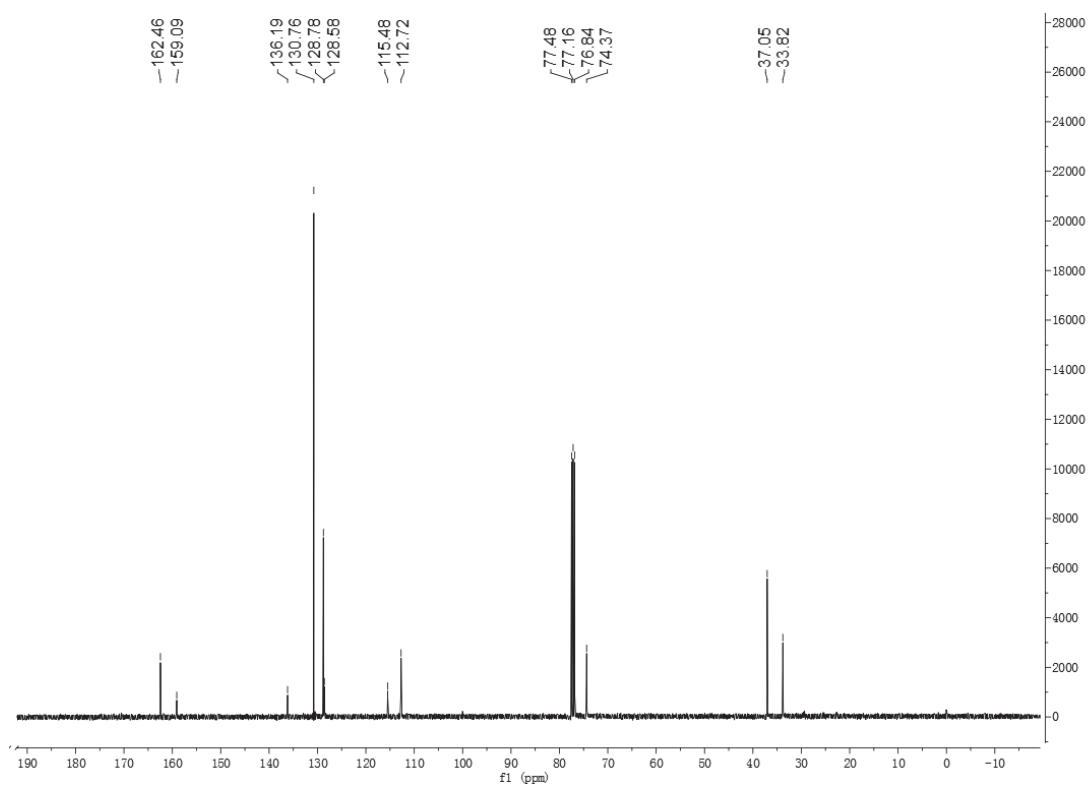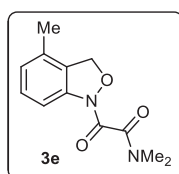

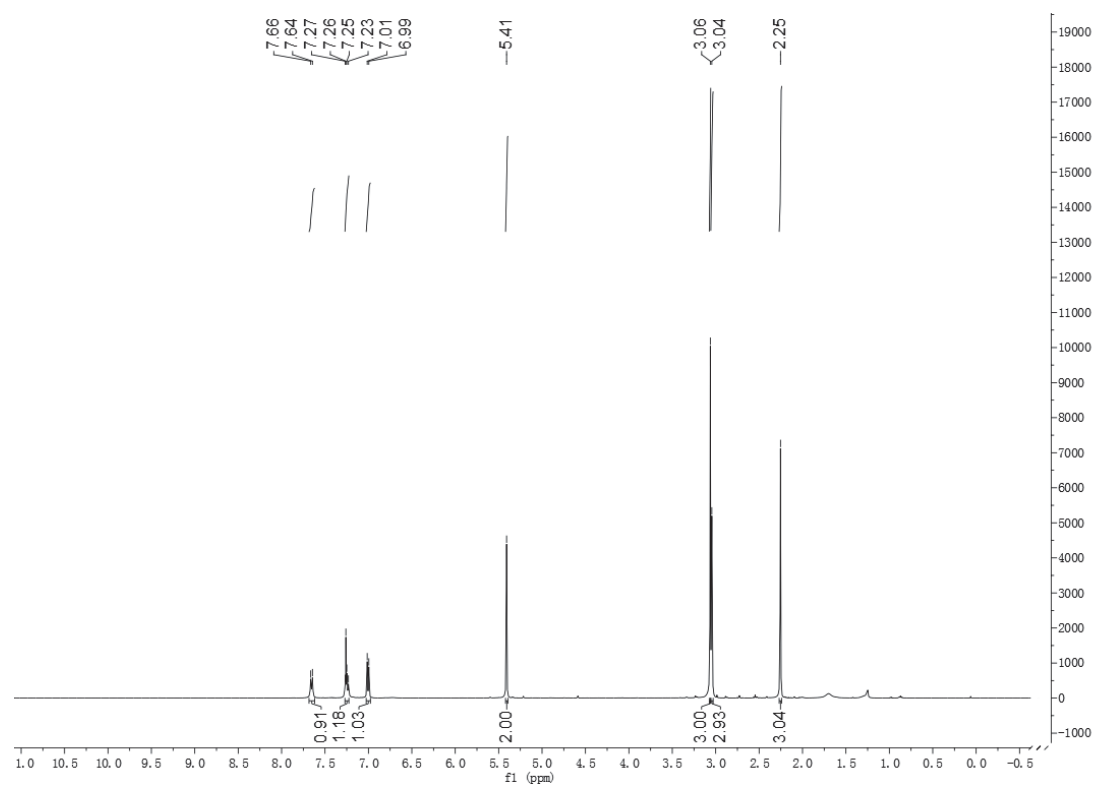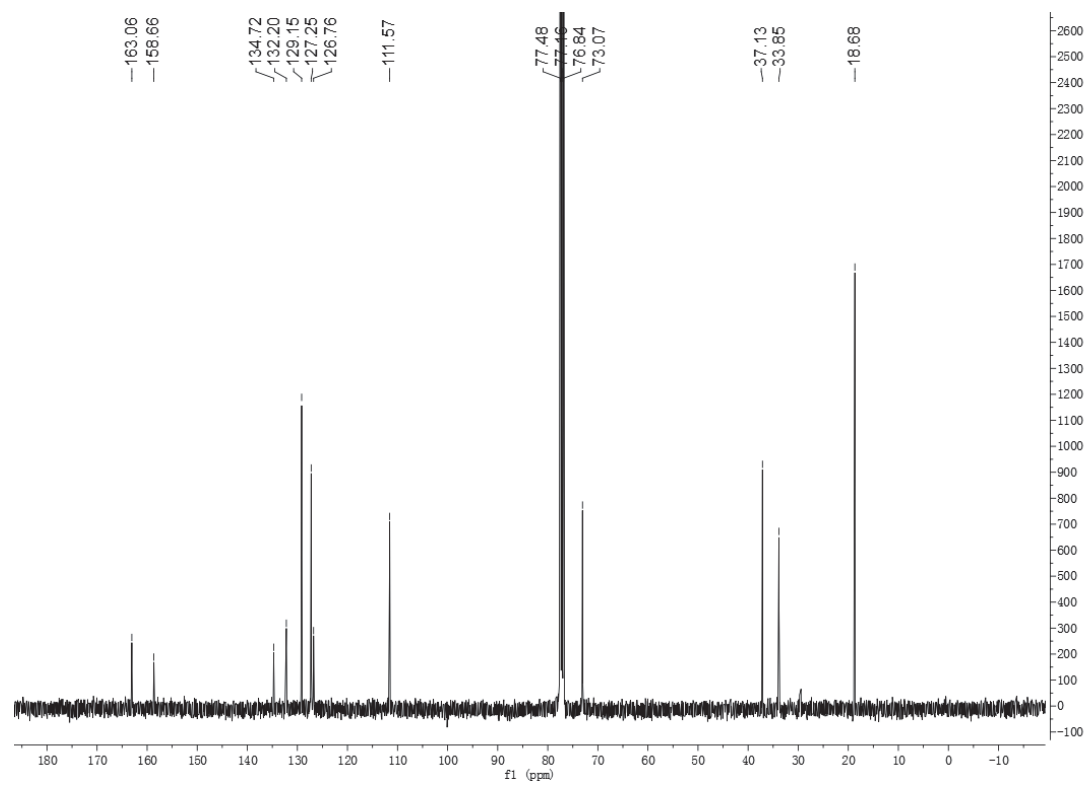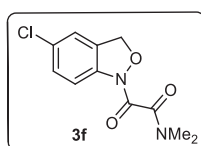

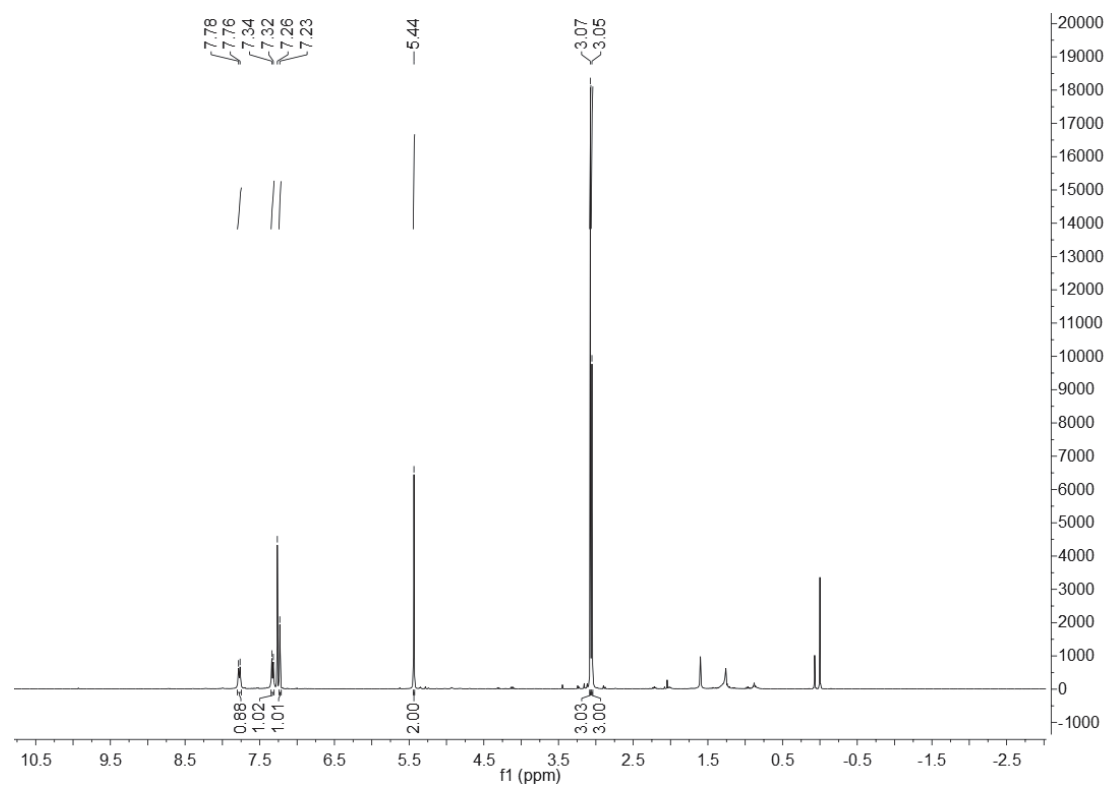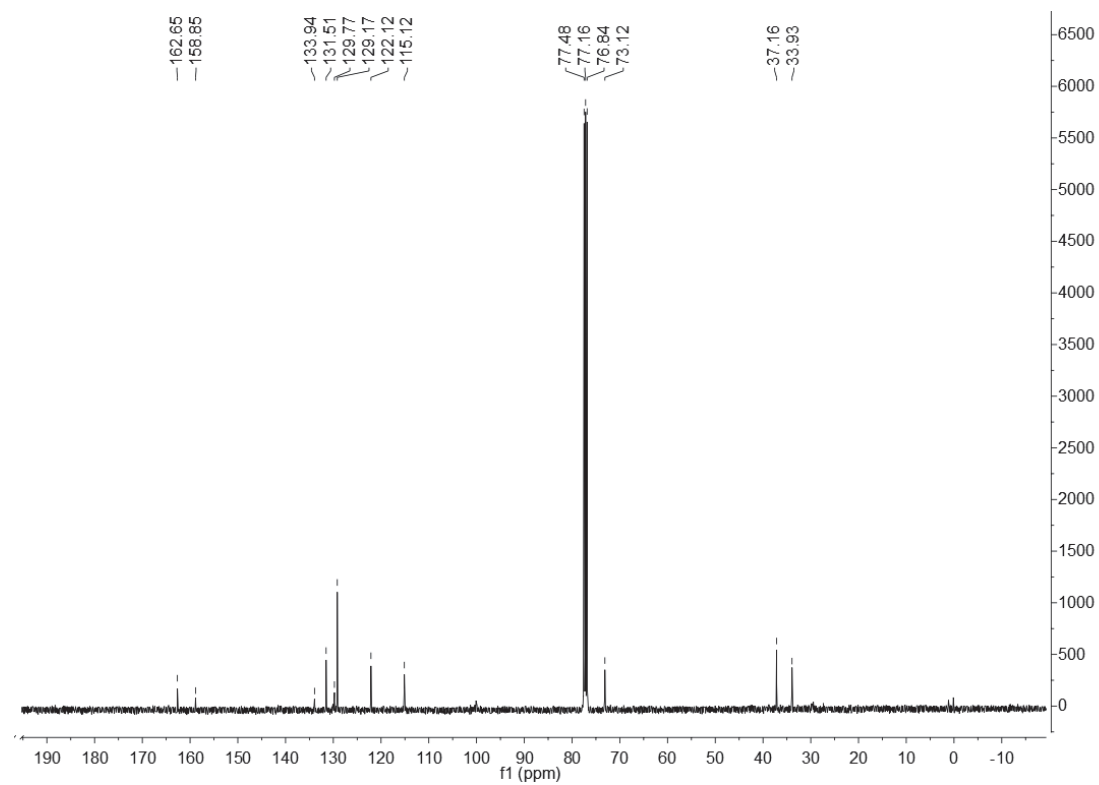

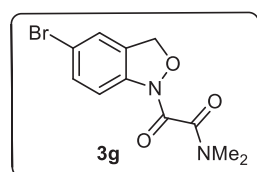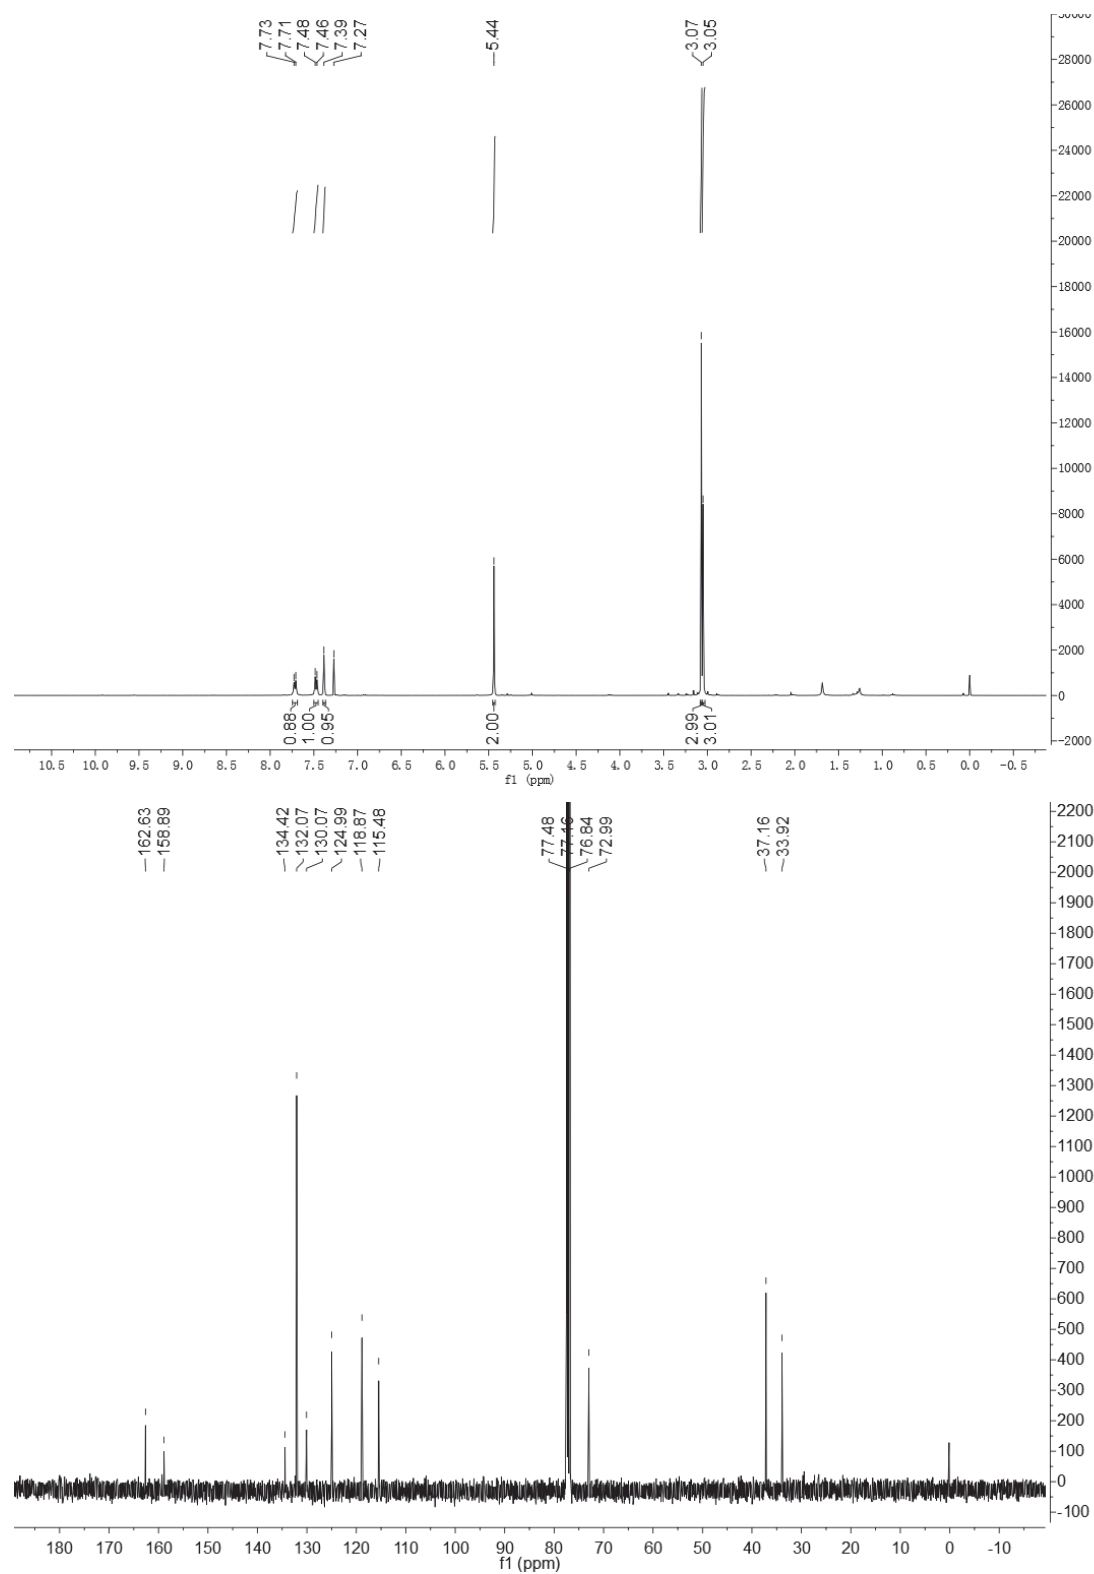

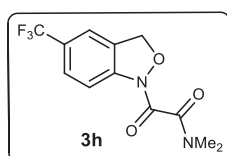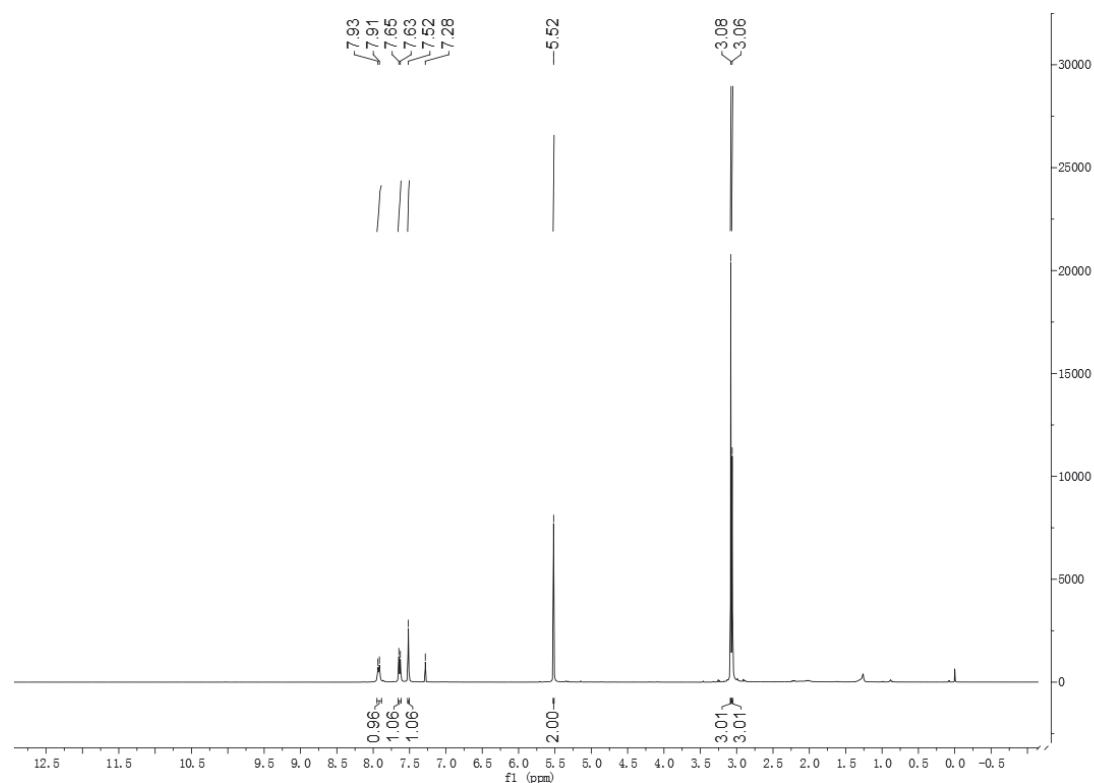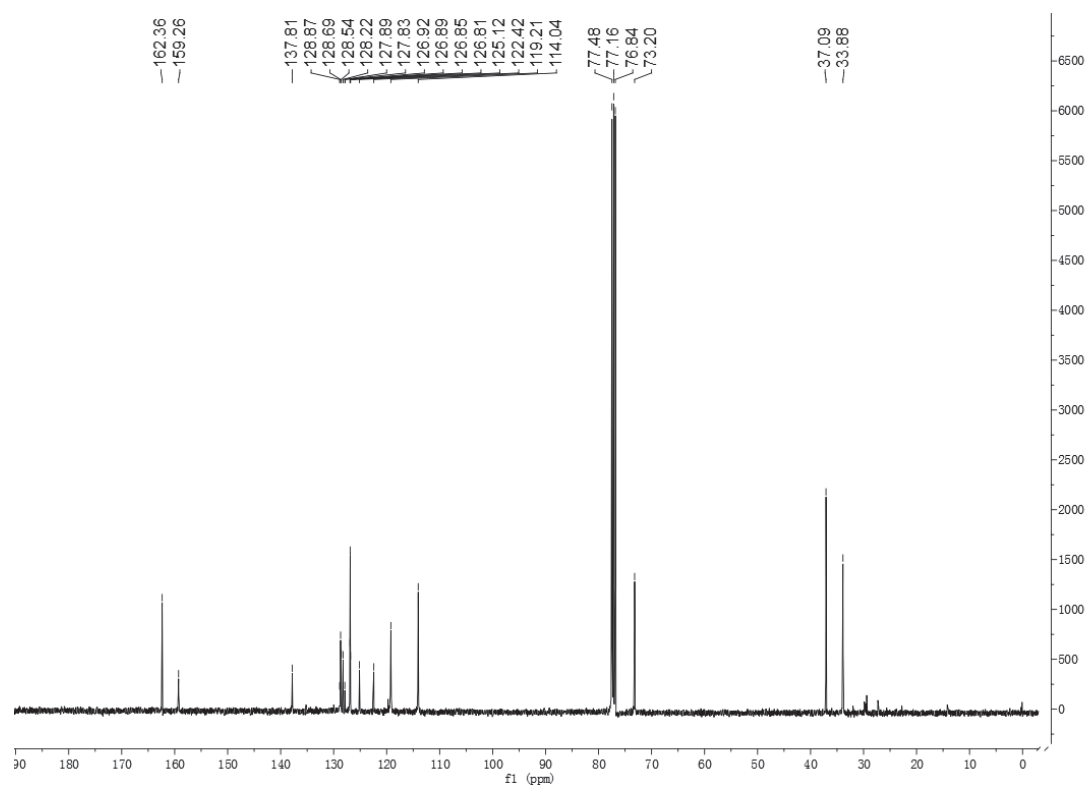



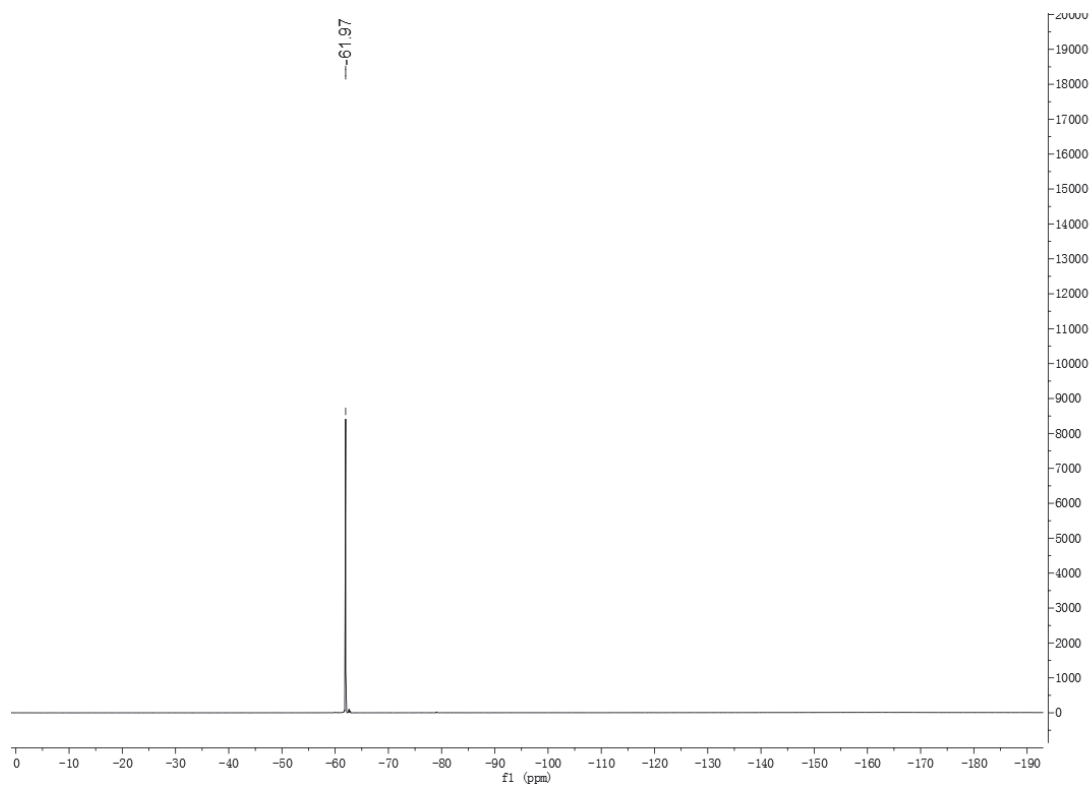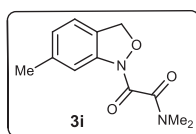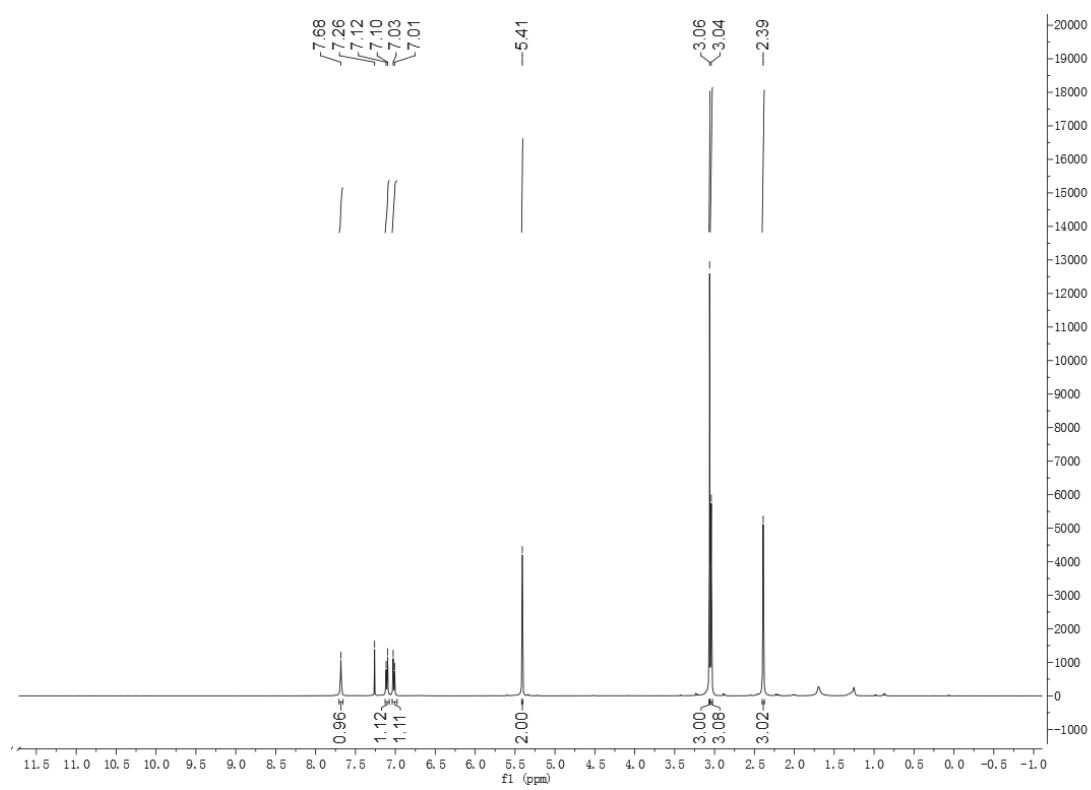

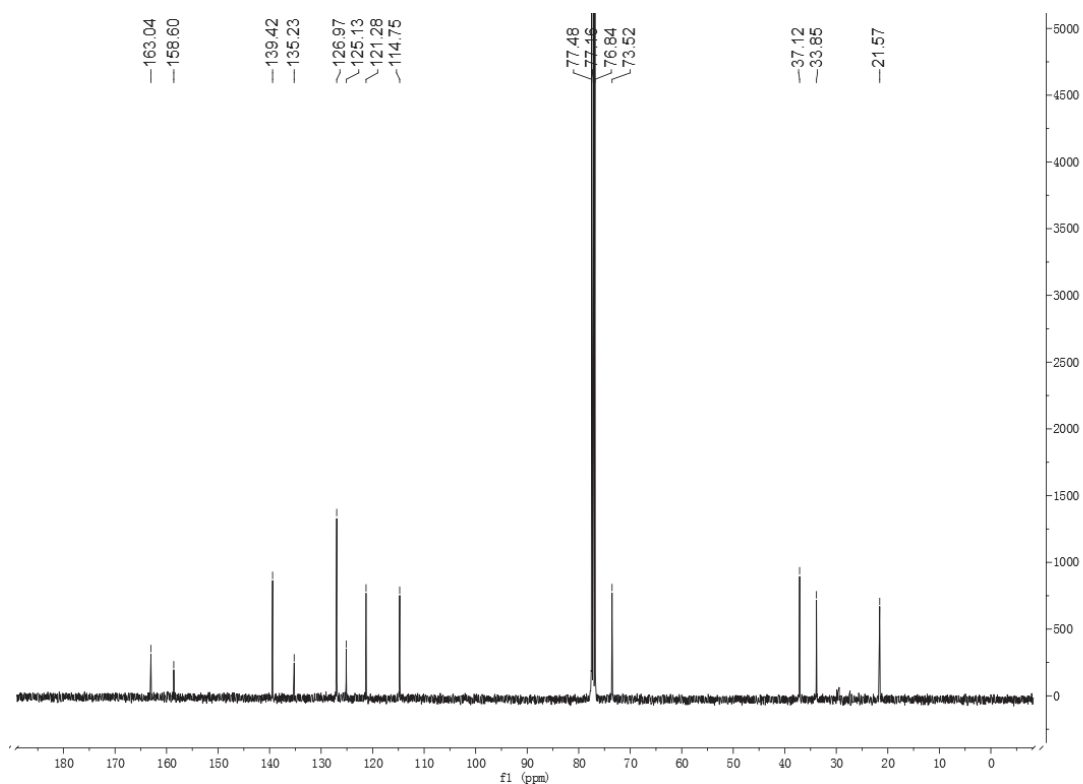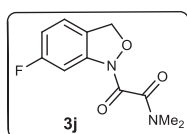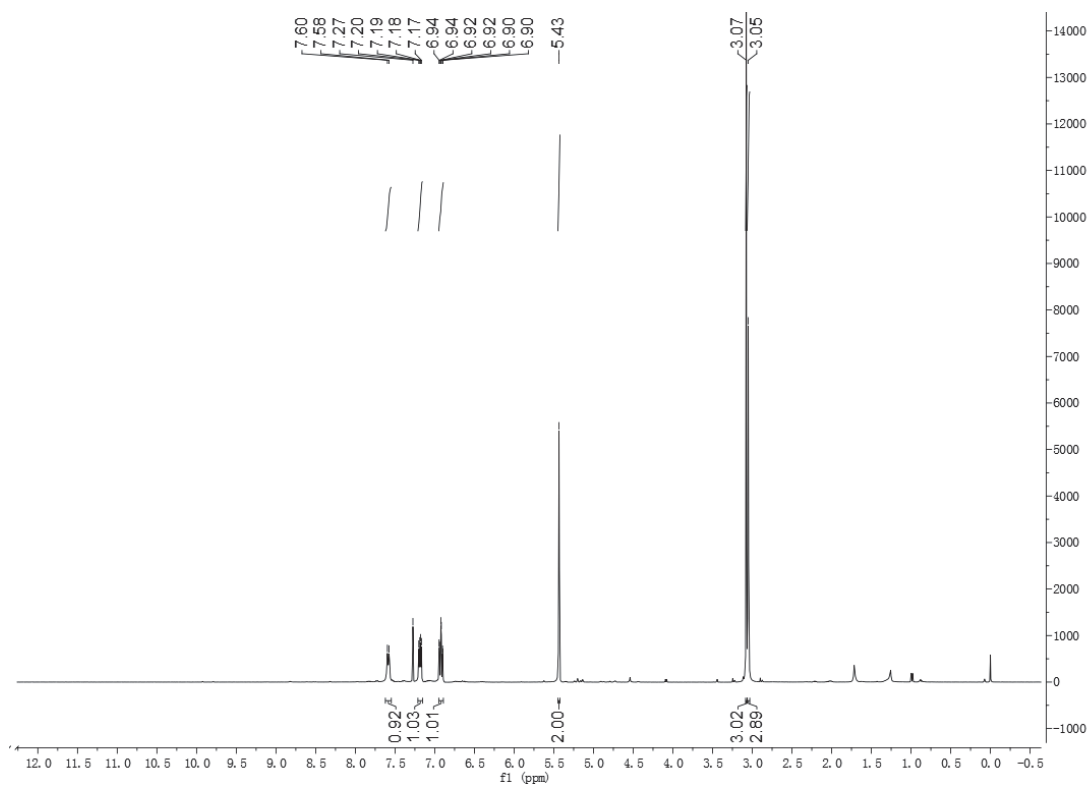

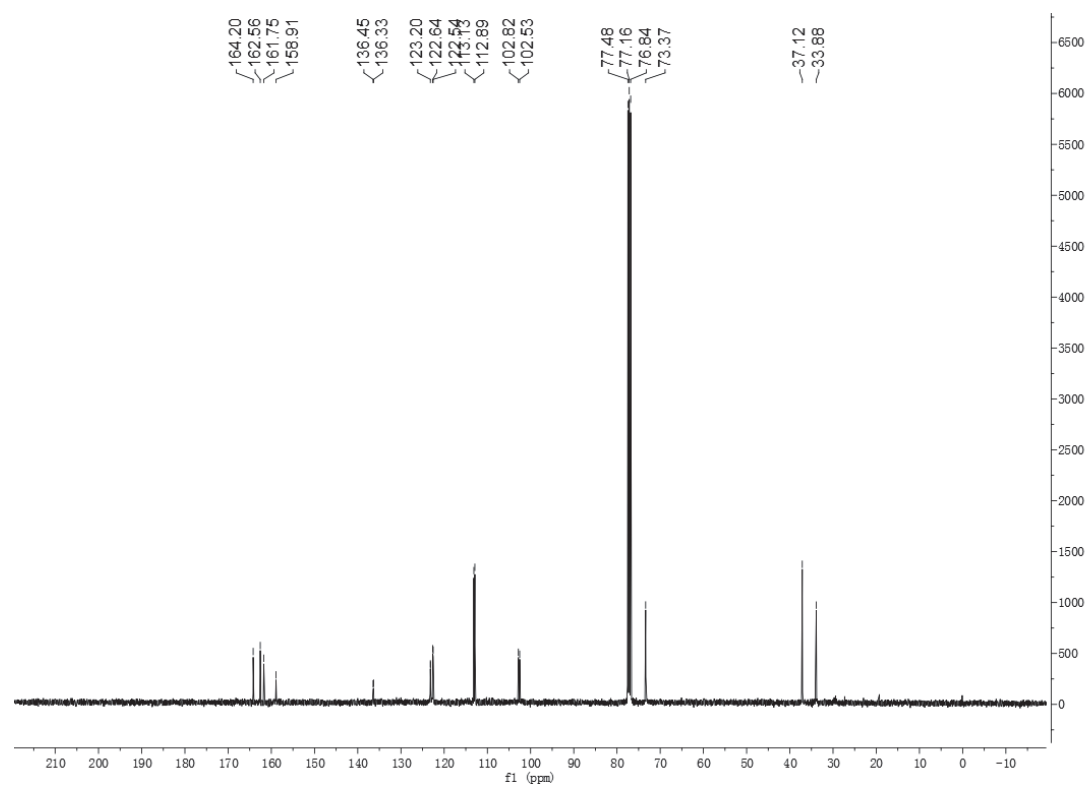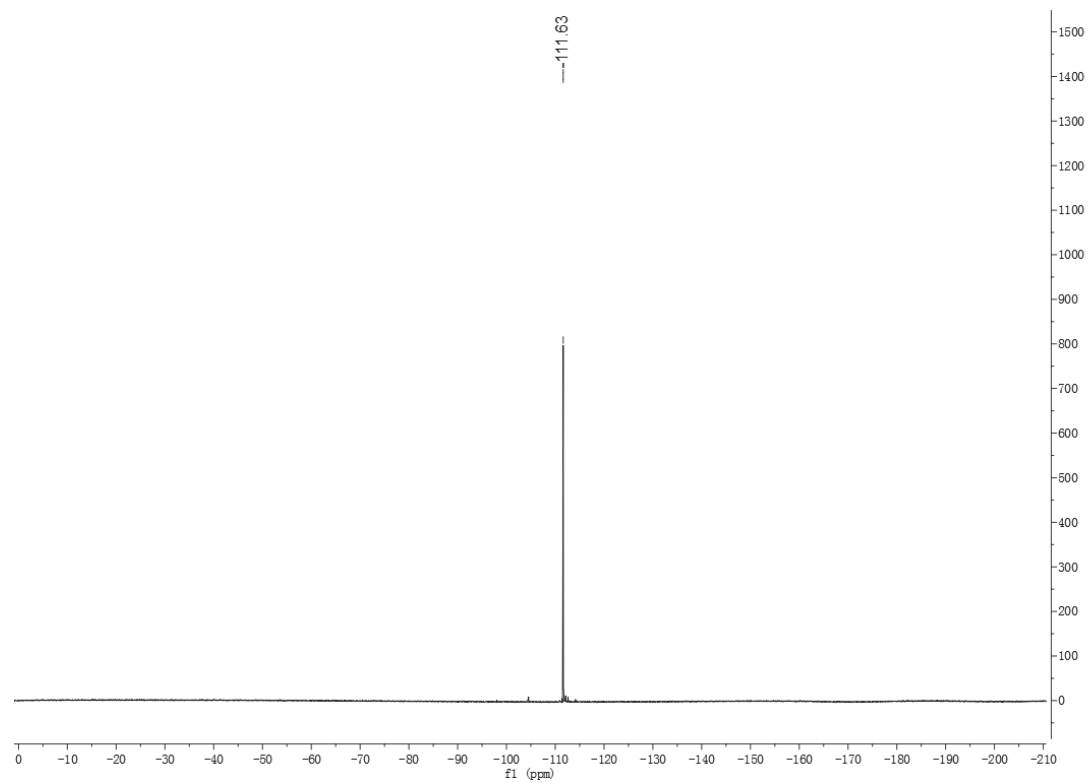

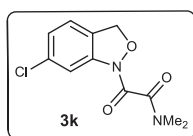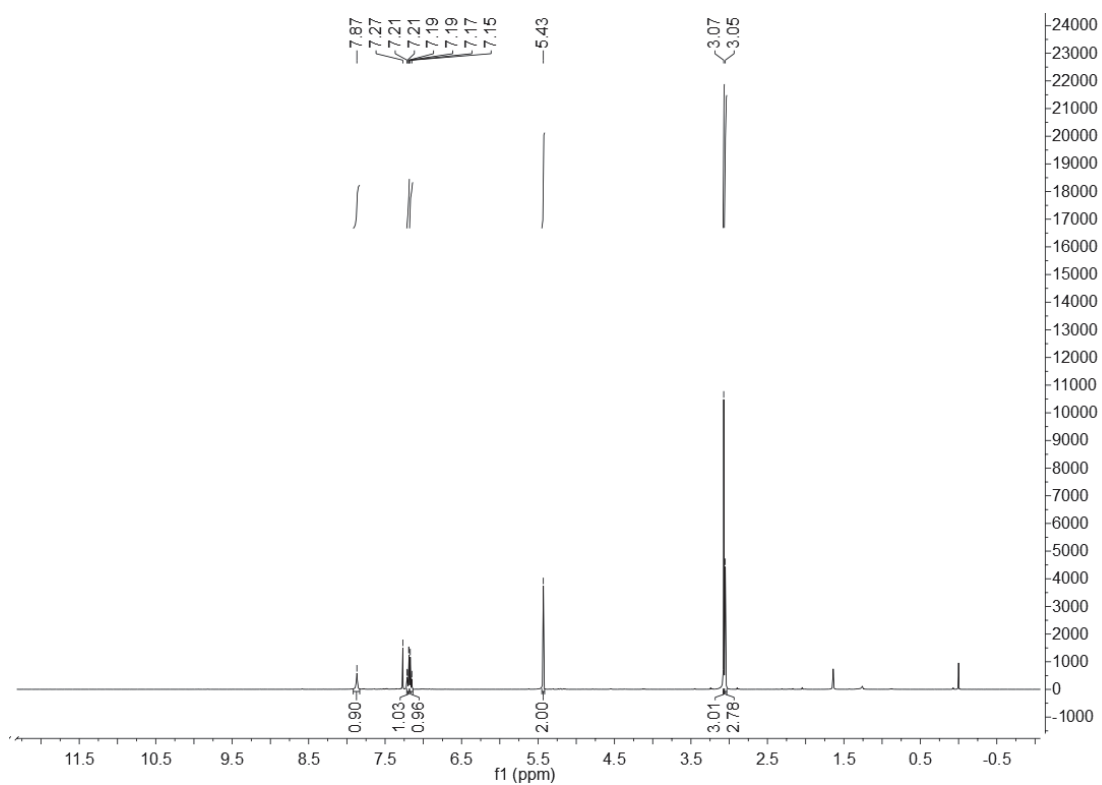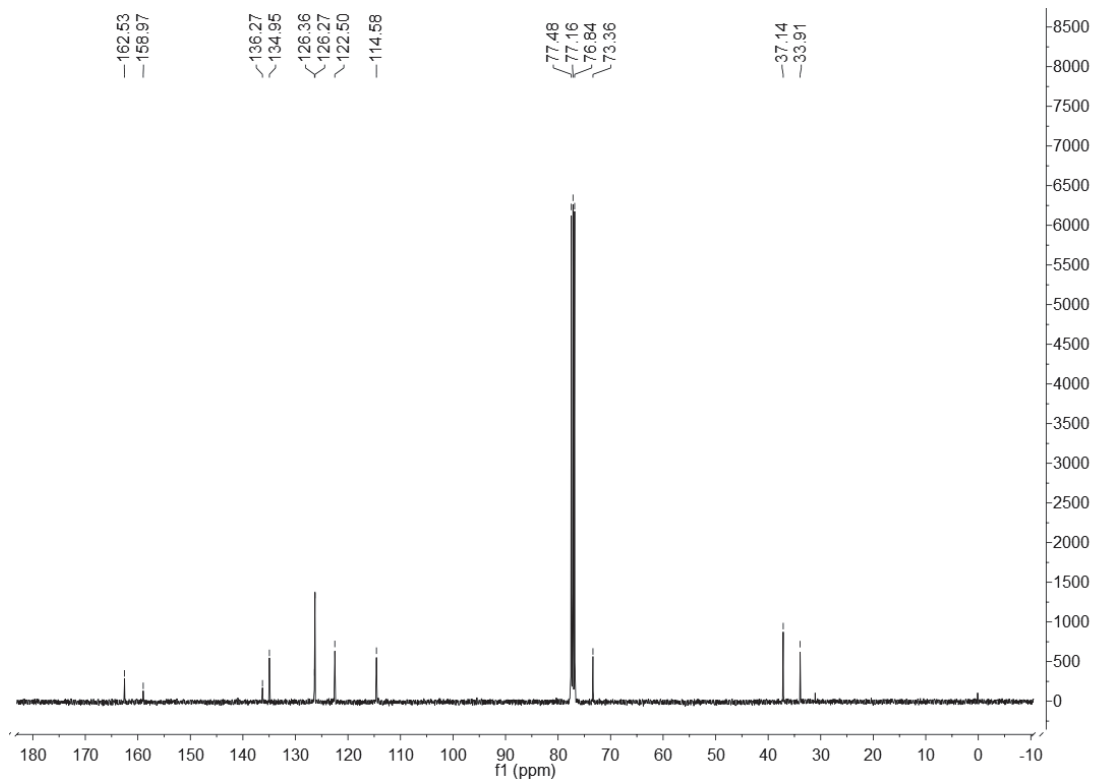

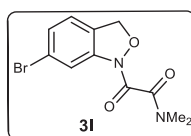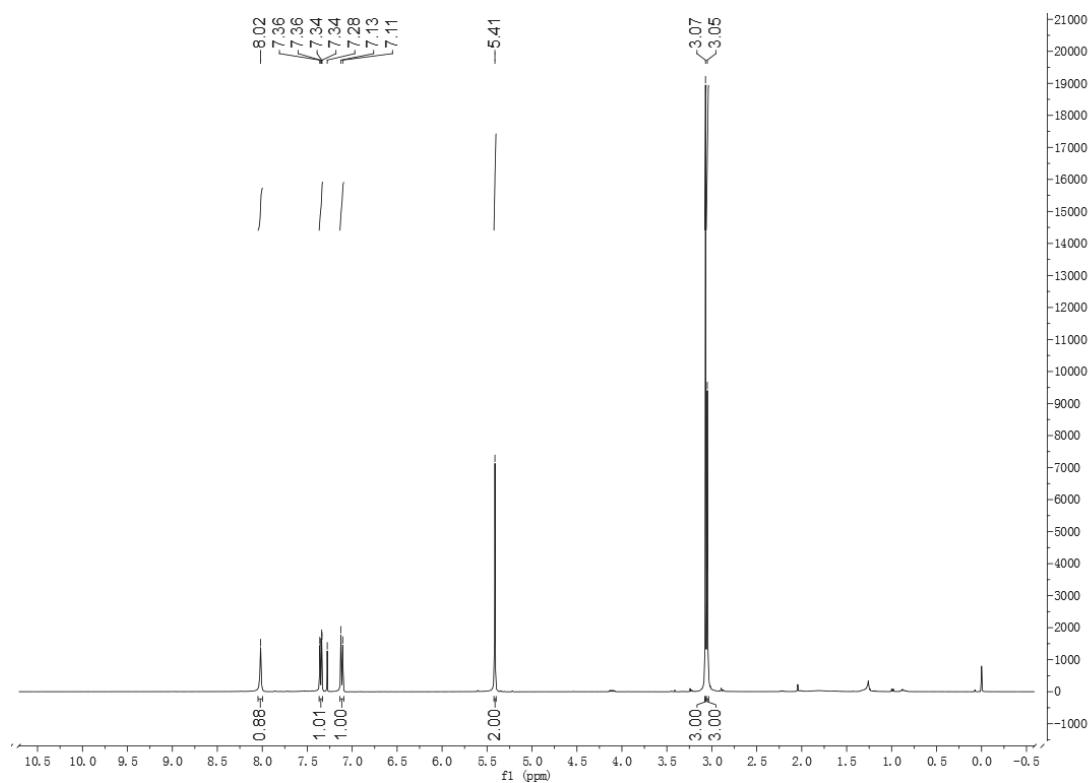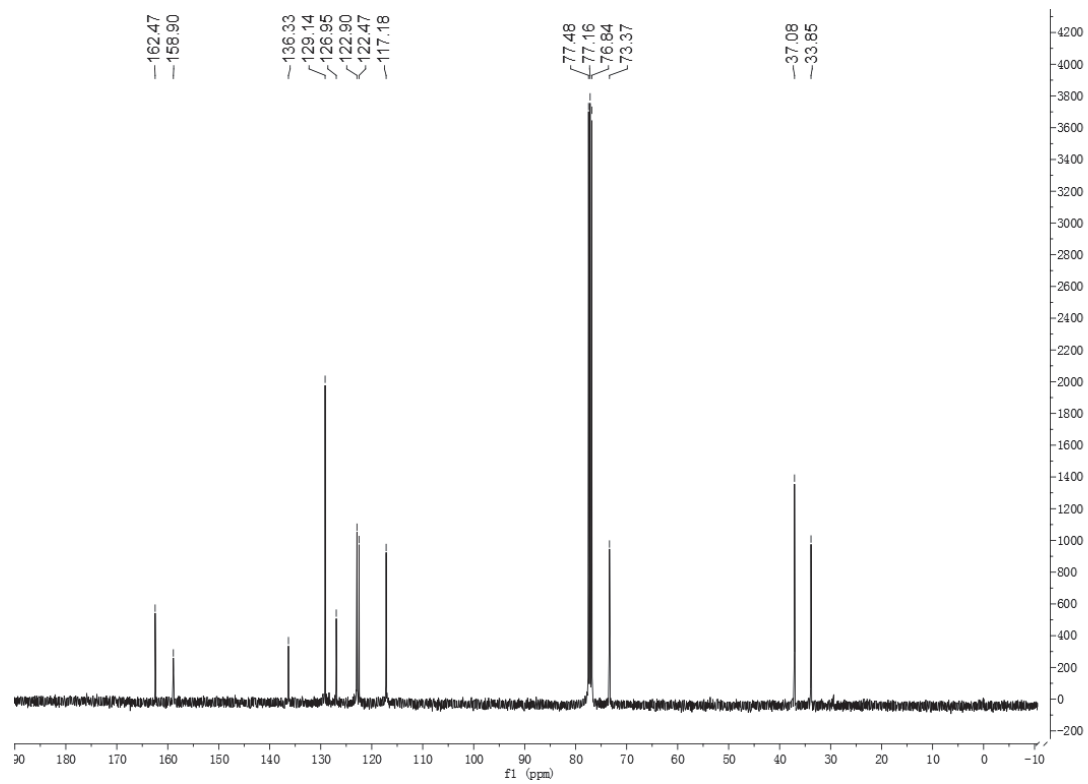

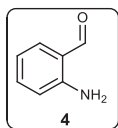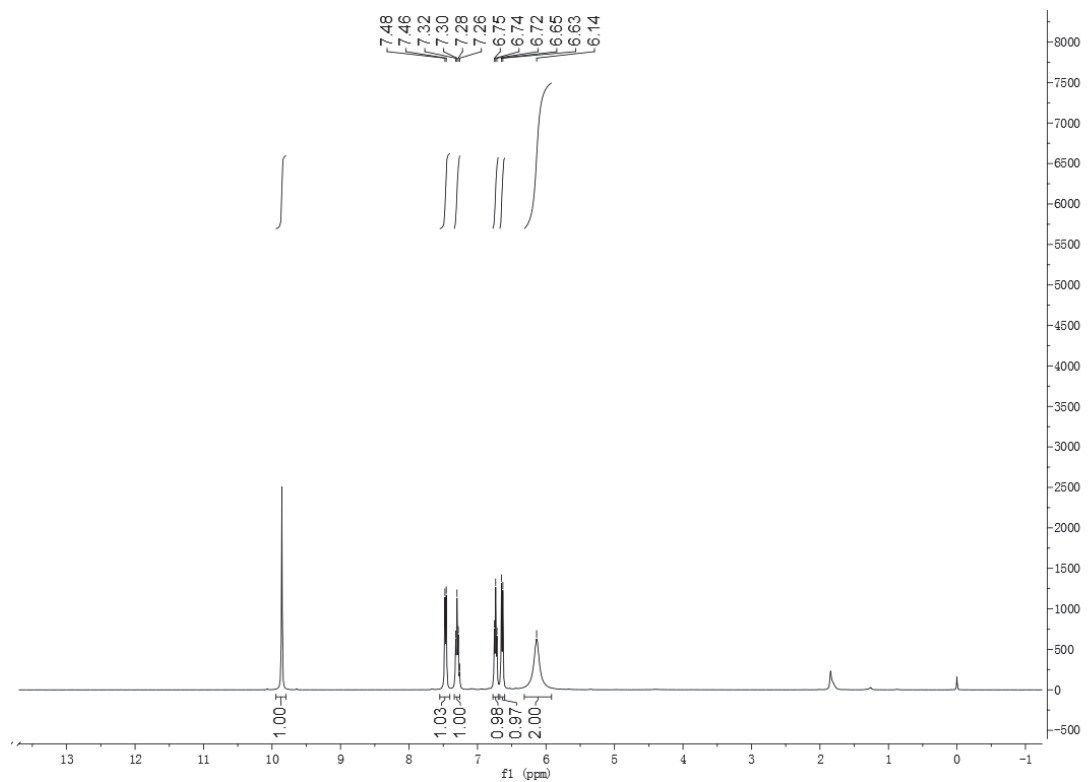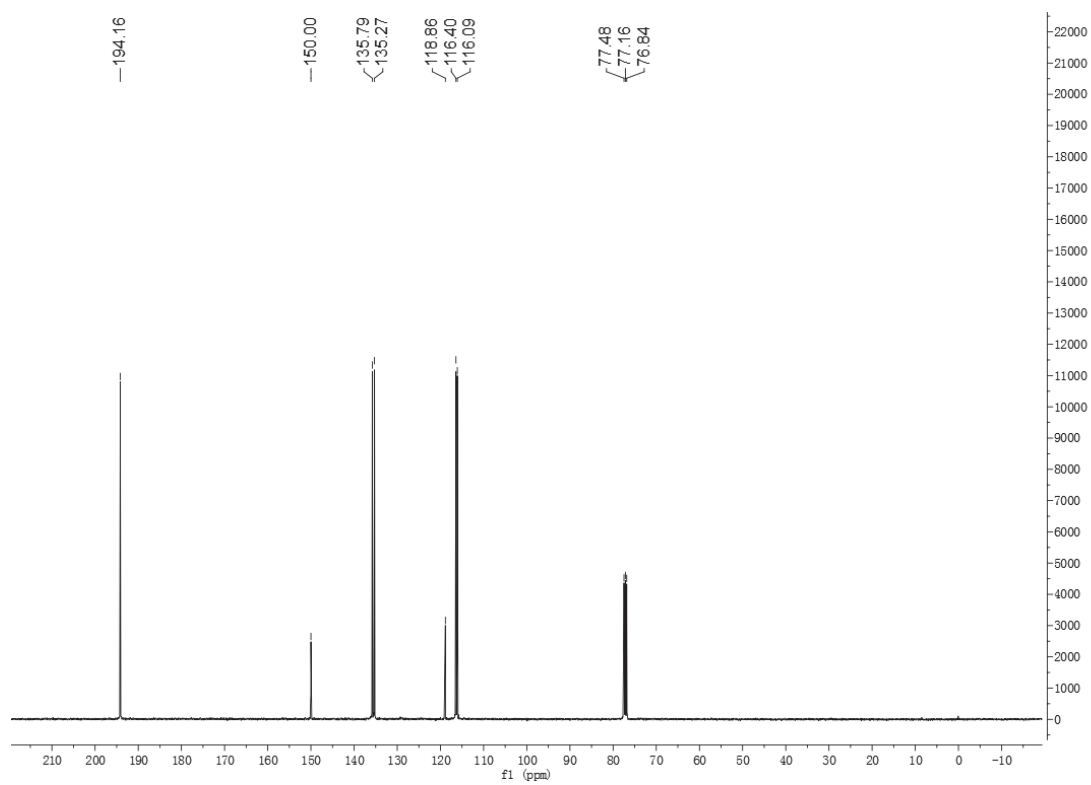

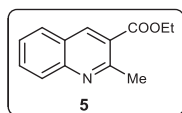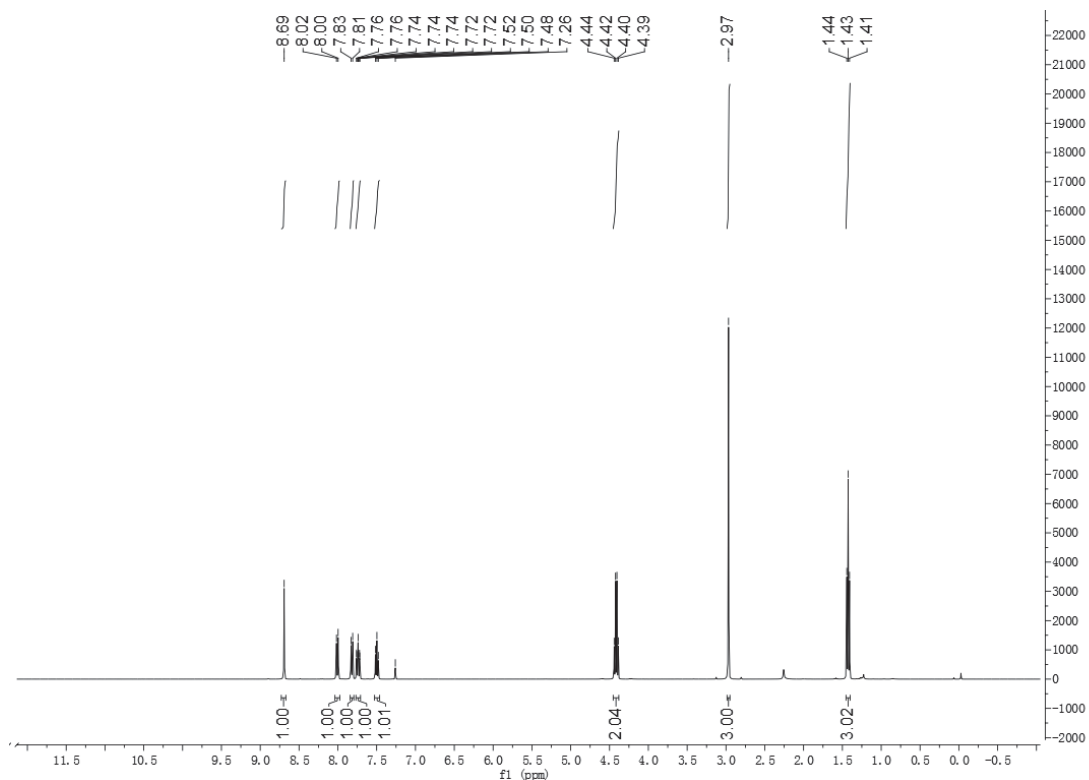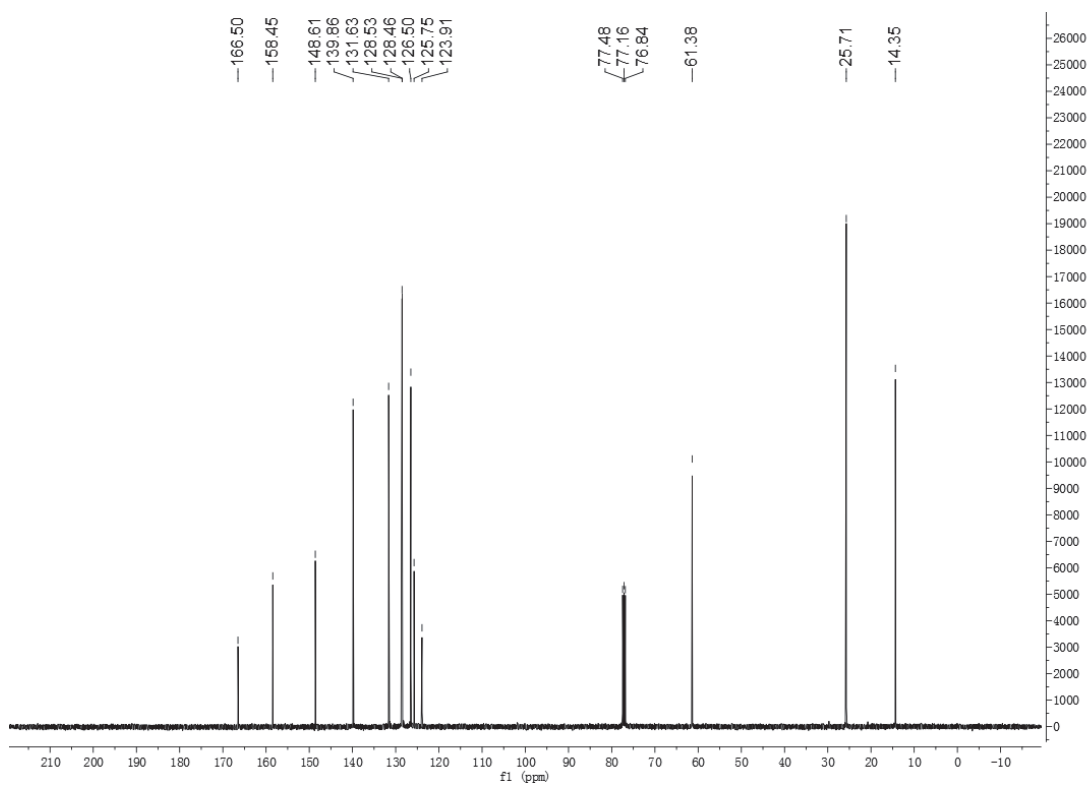

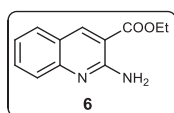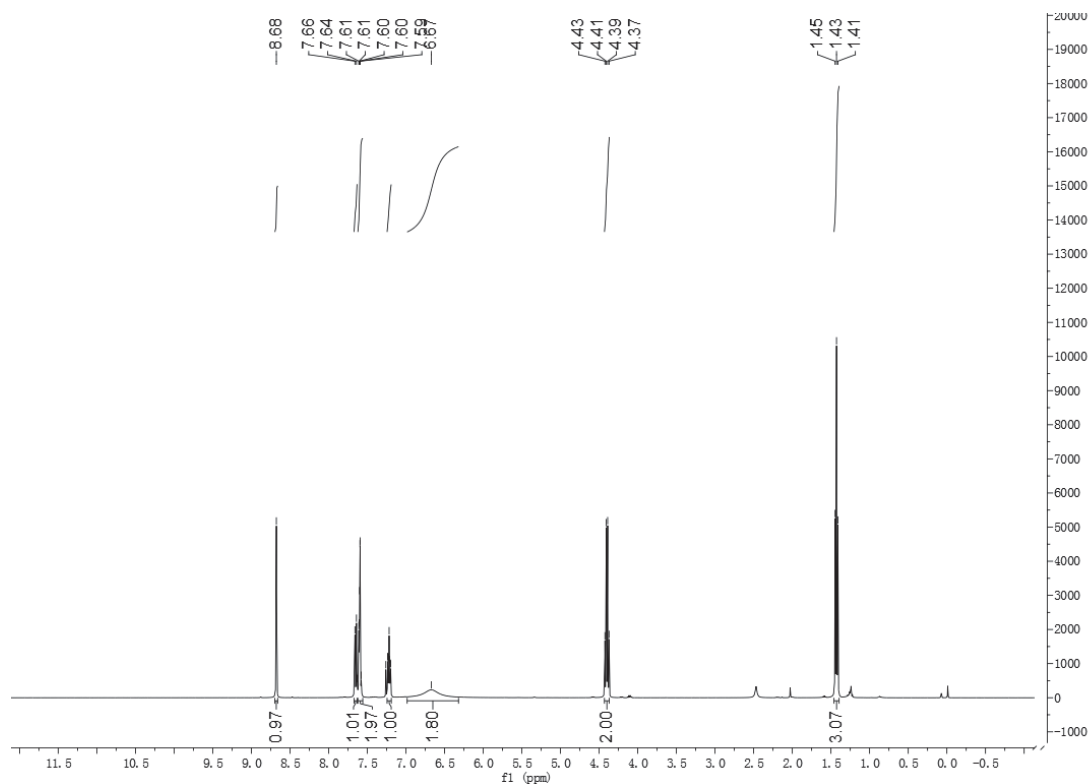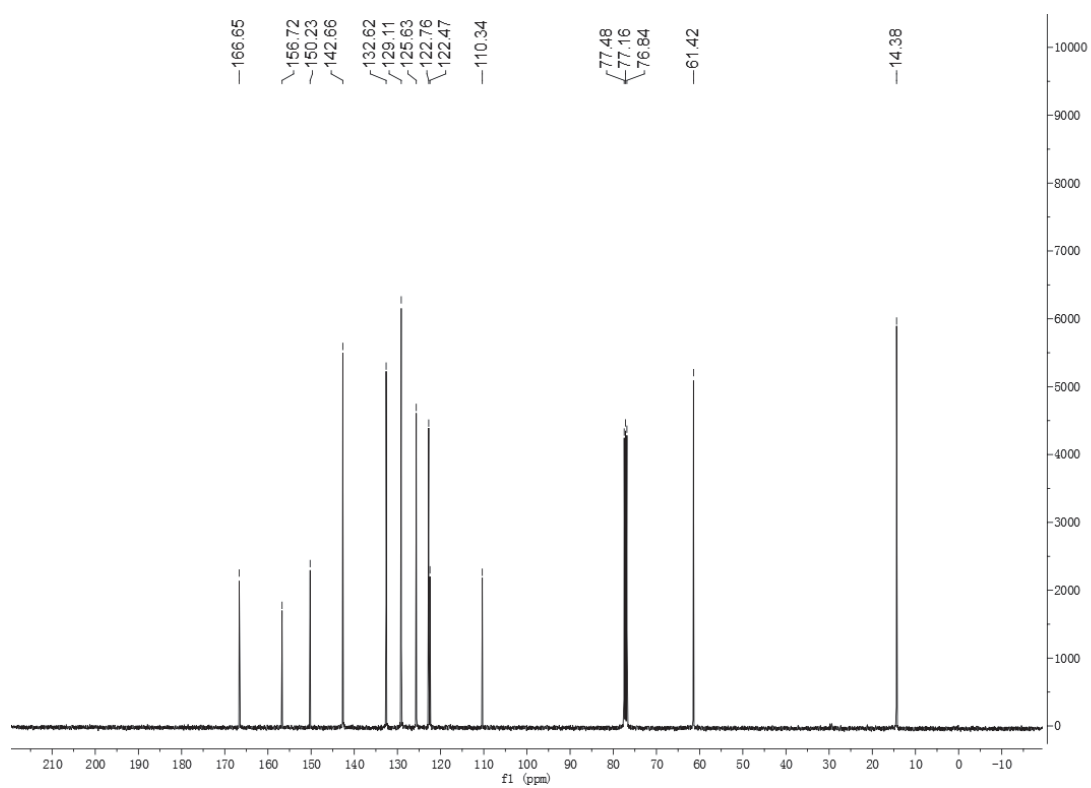



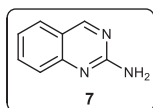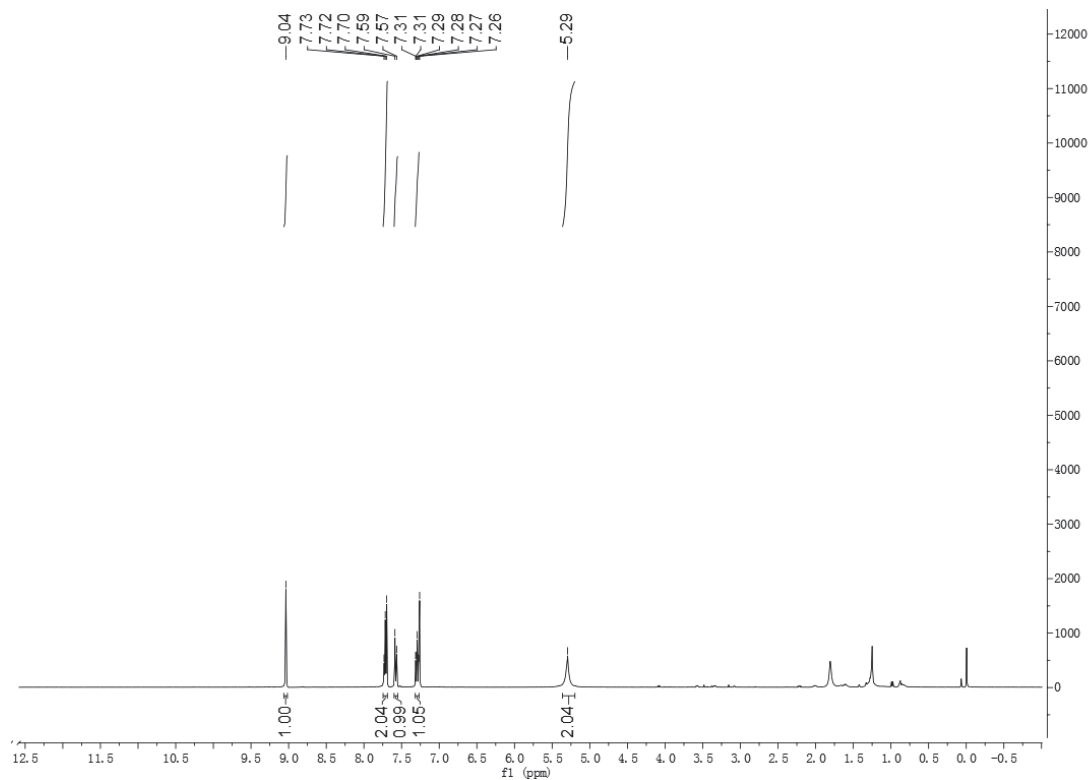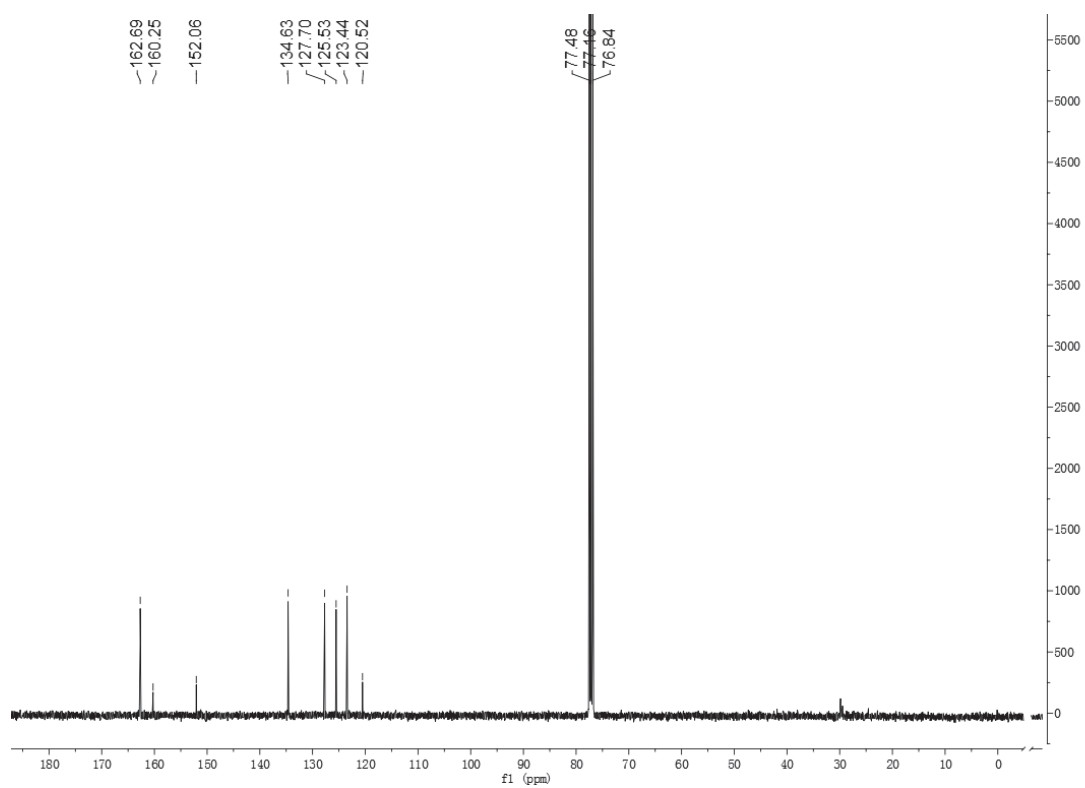

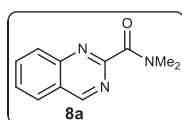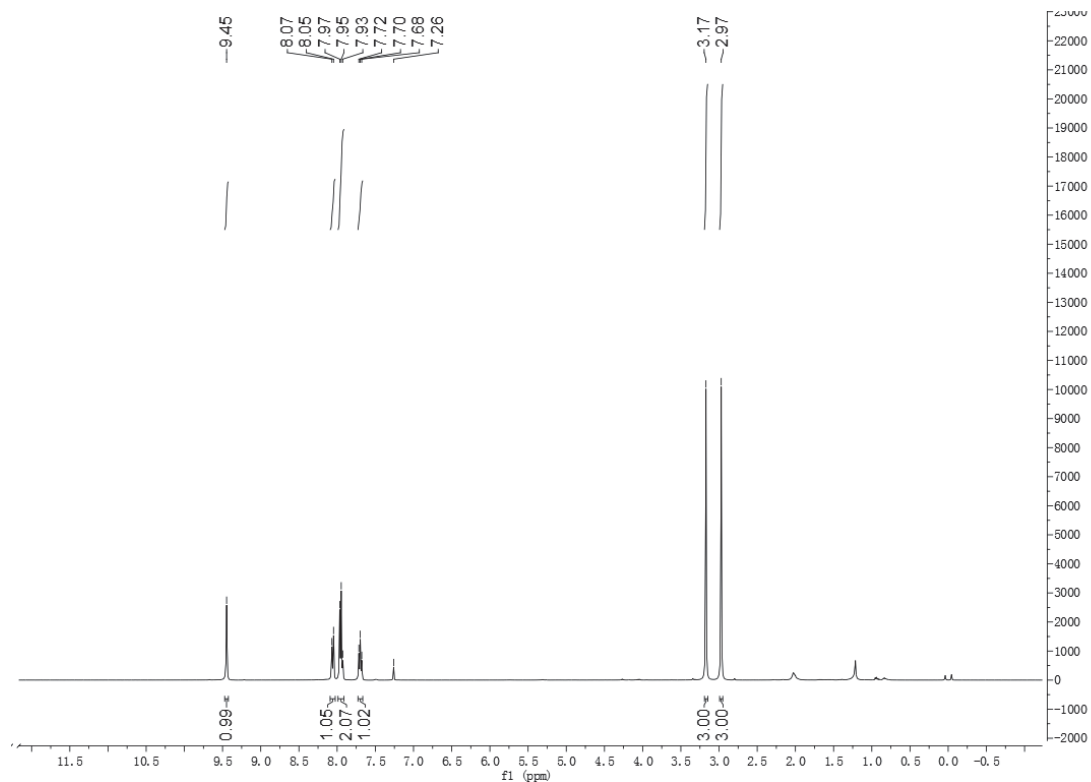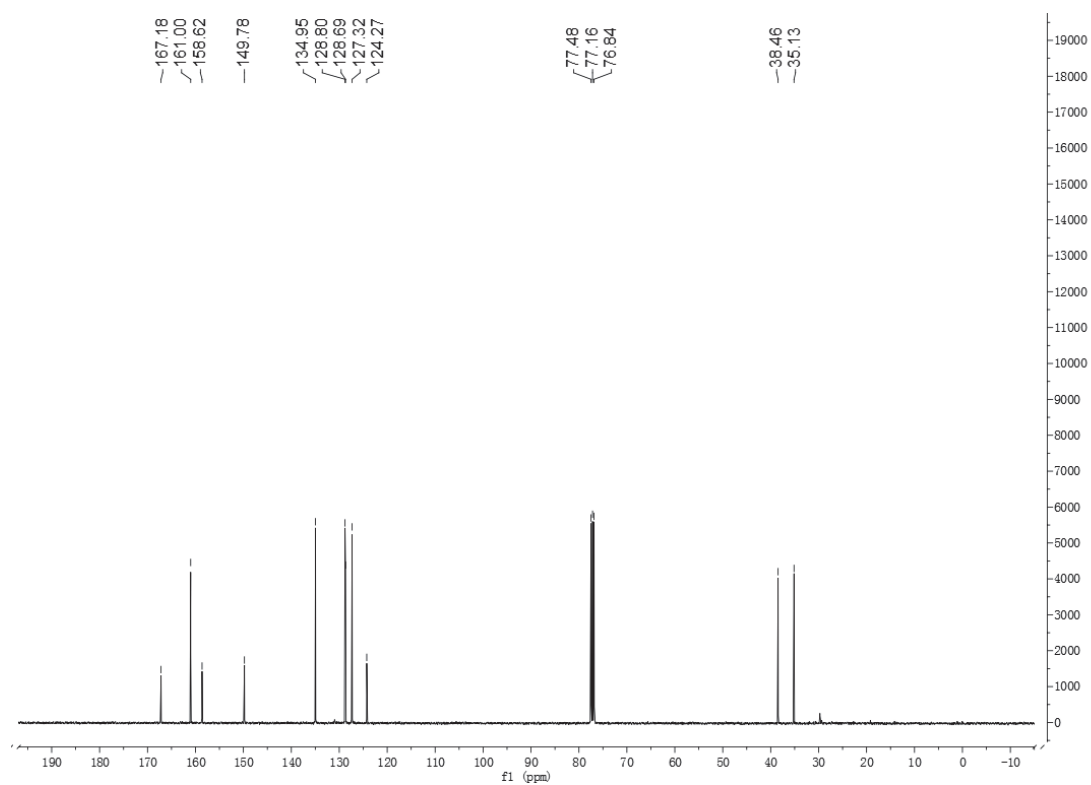

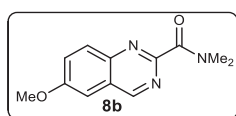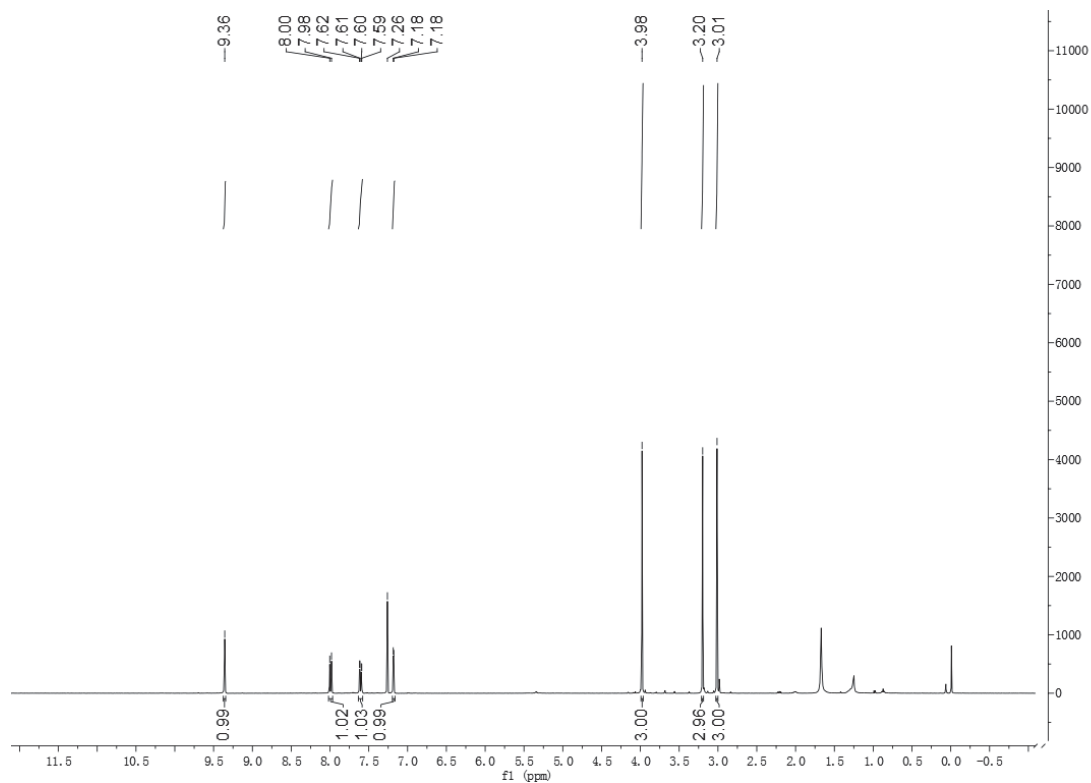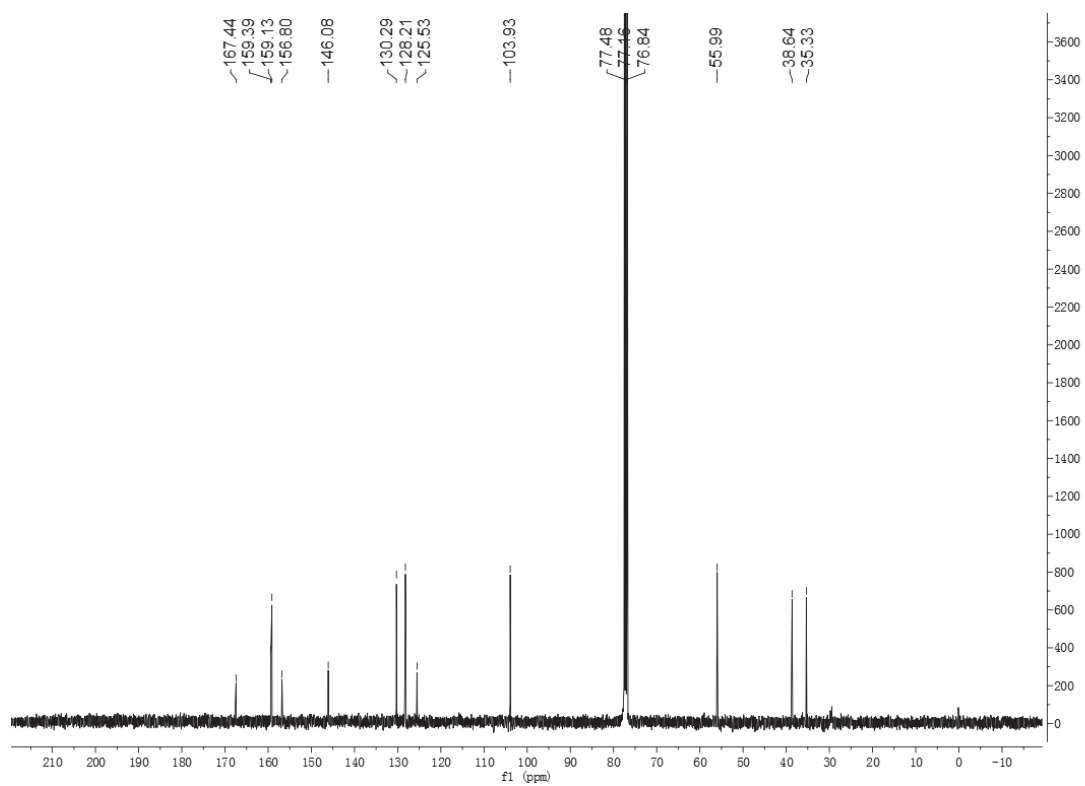

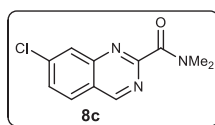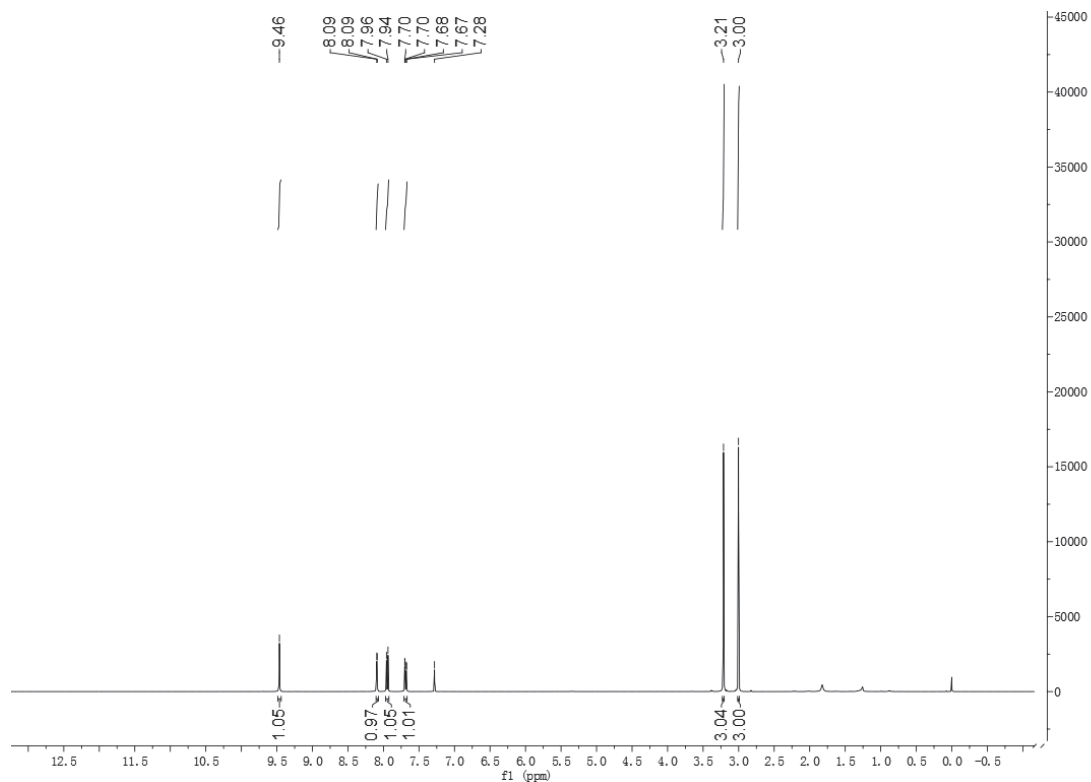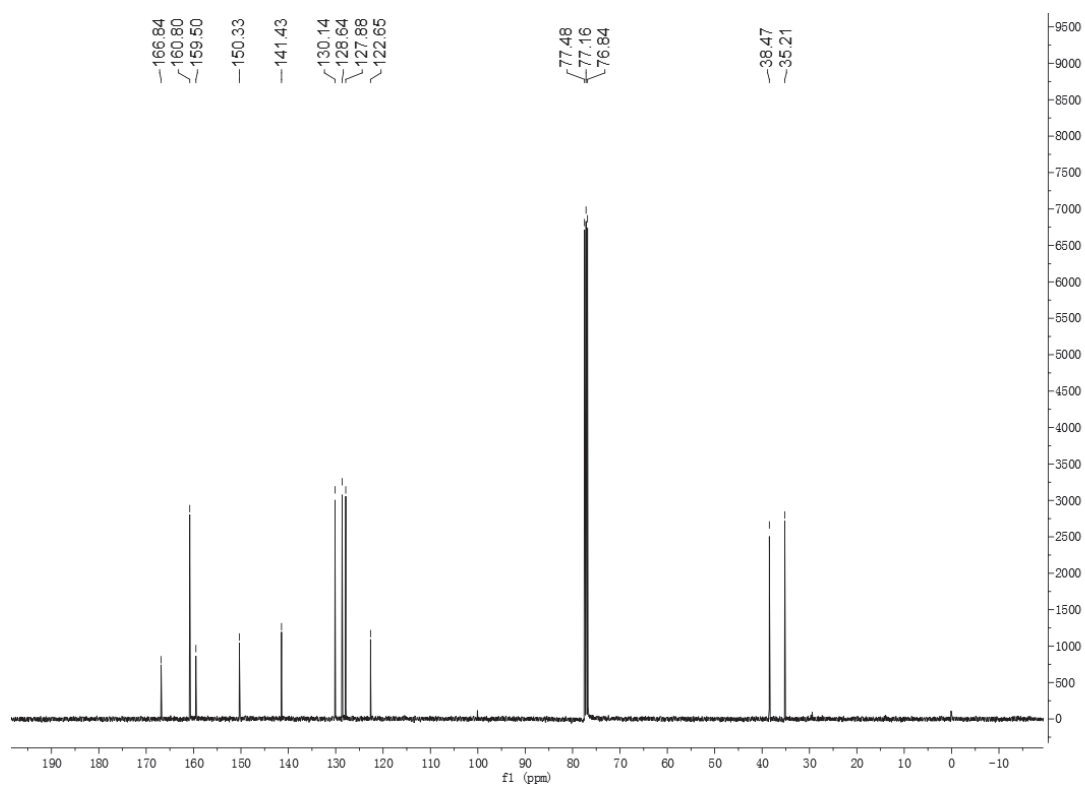

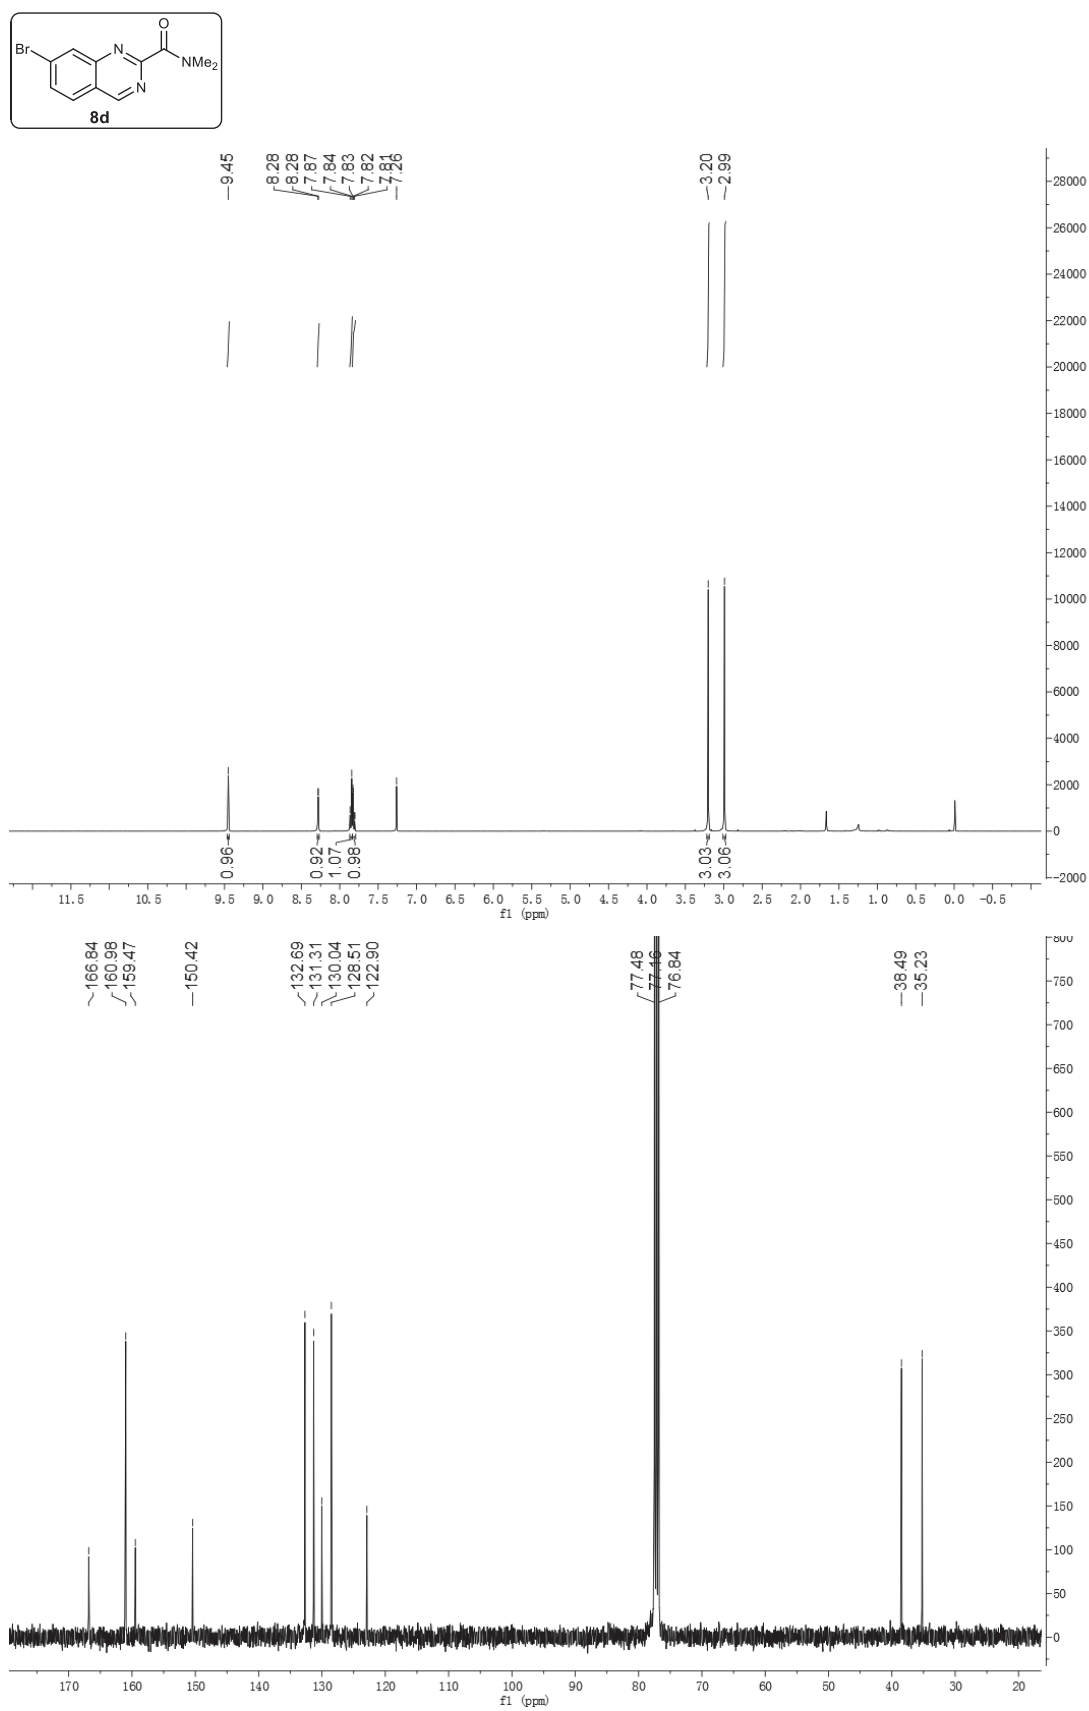

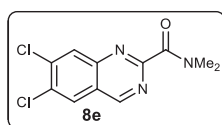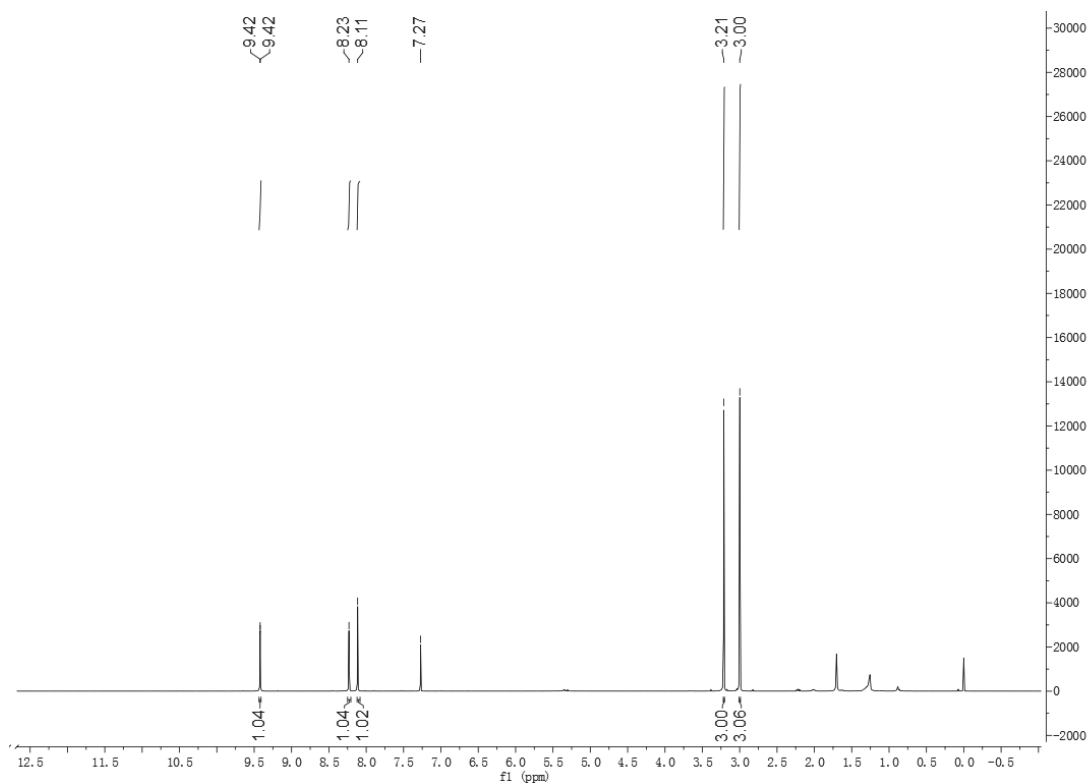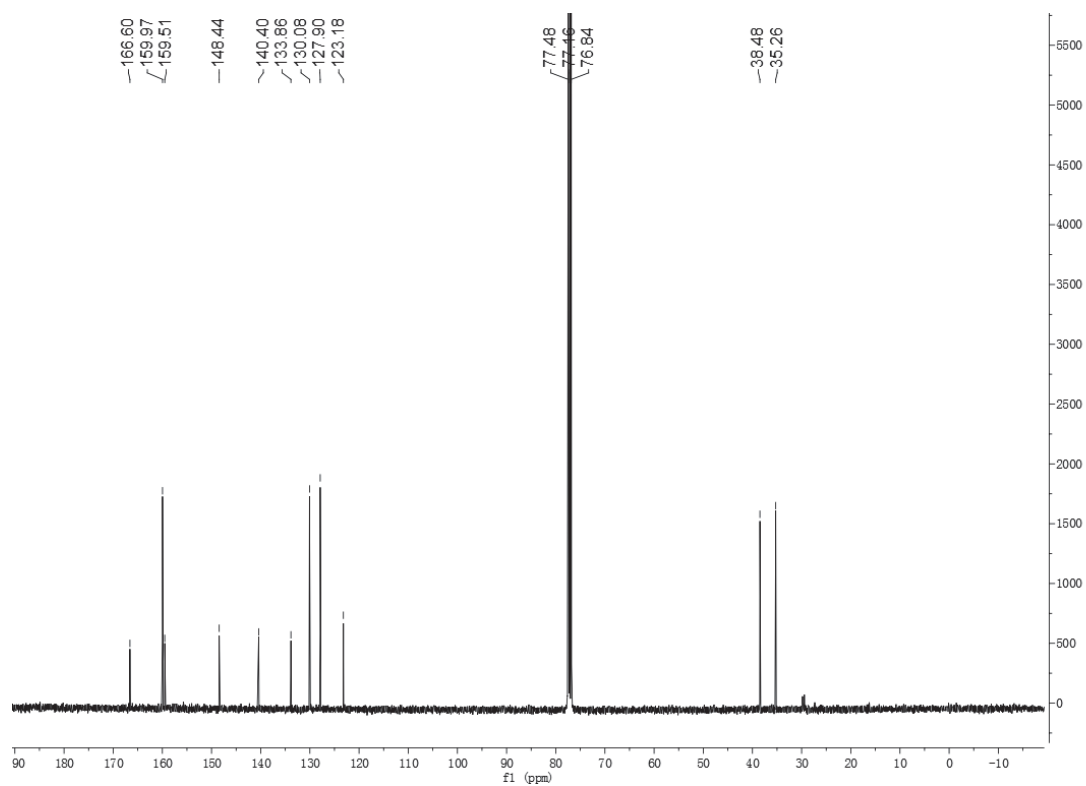

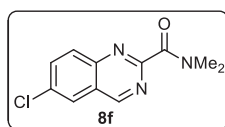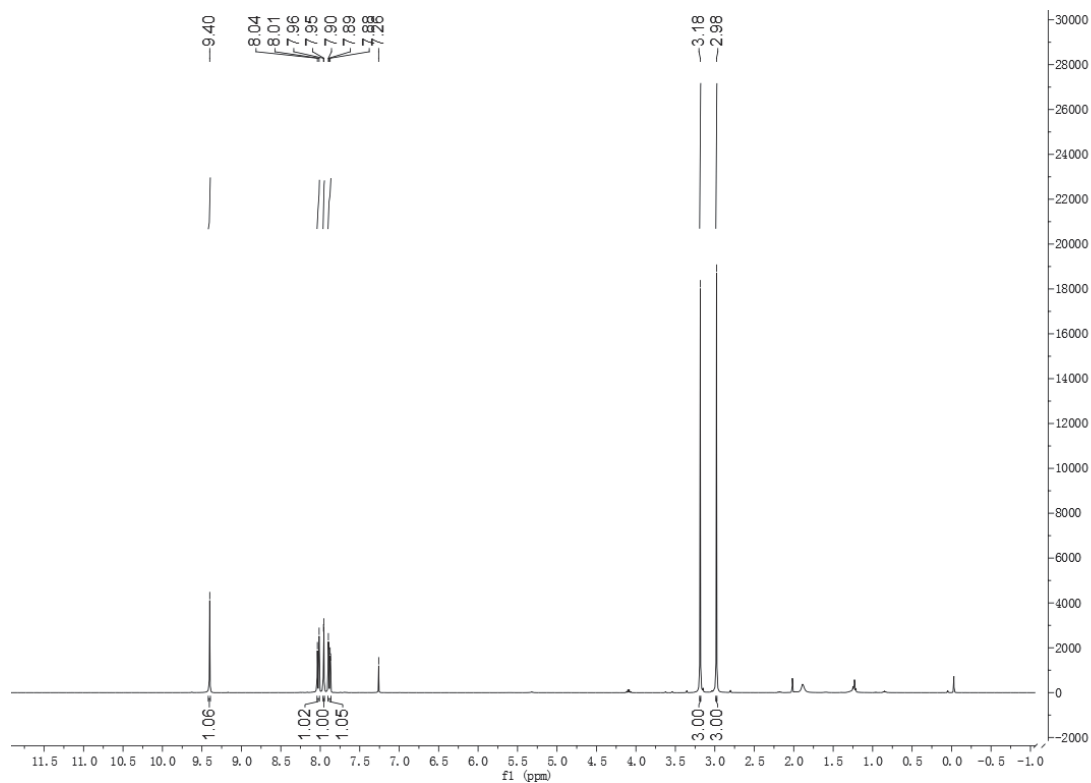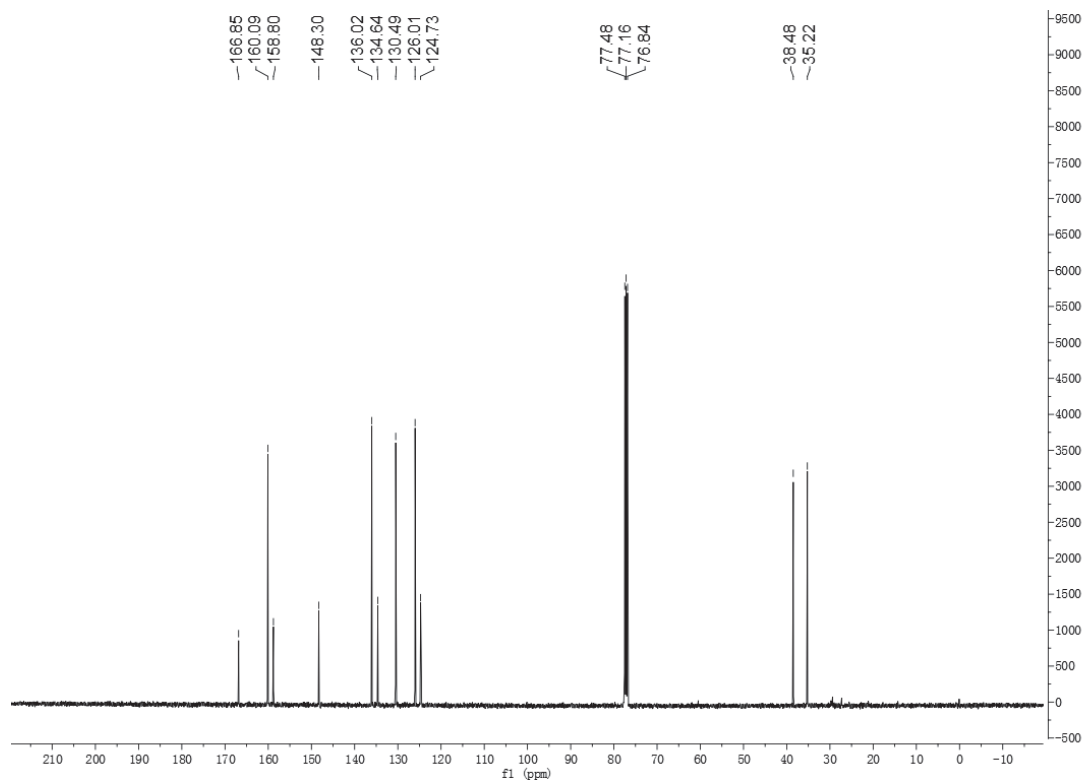

Supplement: c6cc05560e1.pdf [file c6cc05560e1.pdf]
